# Supplementary material for: A Novel Gene Family Controls Species-Specific Morphological Traits in Hydra
Source: PubMed Central journal article supplement (PMC2586386; doi:10.1371/journal.pbio.0060278), 2008-11-18

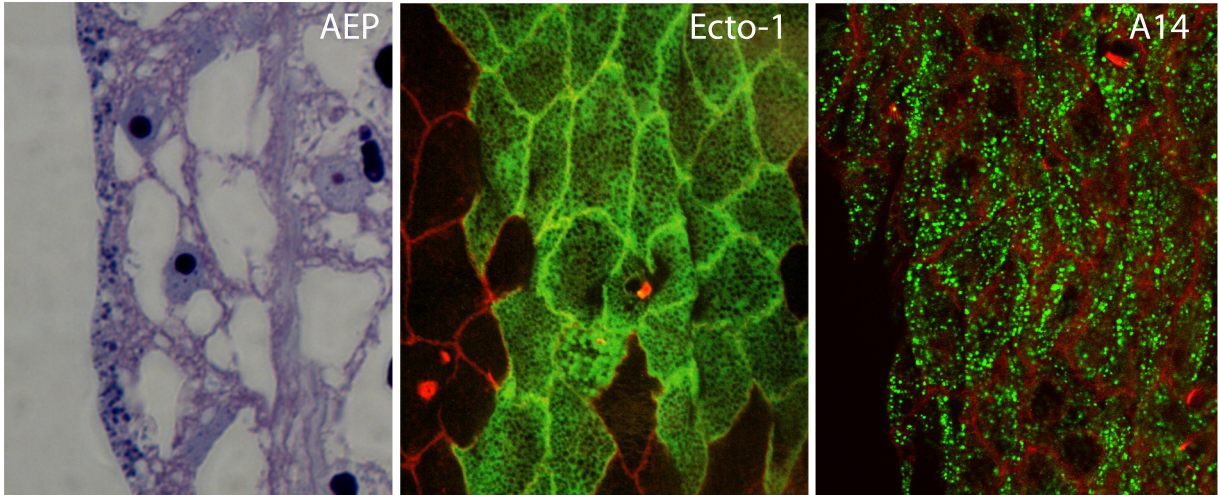

Supplement: pbio.0060278.sg002.pdf [file pbio.0060278.sg002.pdf]
