# Supplementary material for: A Novel Gene Family Controls Species-Specific Morphological Traits in Hydra
Source: PubMed Central journal article supplement (PMC2586386; doi:10.1371/journal.pbio.0060278), 2008-11-18
Supplement: pbio.0060278.st001.pdf [file pbio.0060278.st001.pdf]

**Table S1****KIEL 6 (*Hydra oligactis* specific) SSH library. Results of BLASTX search against non-redundant NCBI database**

General information about clusters and singletons of *H. oligactis*-specific cDNA library (Kiel 6).  
Results of the BLASTX search against non-redundant NCBI database. Sequences with E value  $\geq 1e-5$  were referred to as having no significant homology to the proteins in NCBI database (potential taxon restricted genes, TGRs).  
The clusters were numbered according to the amount of ESTs comprising them, with cluster 01 (CL01CONTIG1) being the largest.  
The consensus cluster sequences and singleton sequences are stored as multi-sequence file (FASTA format) at the COMPAGEN server (<http://compagen.zoologie.uni-kiel.de/retrieve.htm>).

**Pct Idnt**, % identity between *H. oligactis* amino acid sequence and the best BLASTX match from NCBI

**Length (bp)**, length of consensus cluster sequence or singleton in base pares

| N  | Name        | Best blast match (with E-value < 1e-5)                                        | Accession number | Expect   | Pct Idnt | Ratio Idnt |
|----|-------------|-------------------------------------------------------------------------------|------------------|----------|----------|------------|
| 1  | CL1CONTIG1  | GB ABC25029.1  ferritin [ <i>Hydra vulgaris</i> ]                             | ABC25029.1       | 9,00E-84 | 96       | 153/159    |
| 2  | CL2CONTIG1  | no blast match                                                                |                  |          | 0        |            |
| 3  | CL3CONTIG1  | EMB CAM36311.1  hypothetical protein [ <i>Thermobia domestica</i> ]           | CAM36311.1       | 6,00E-09 | 62       | 31/50      |
| 4  | CL3CONTIG2  | EMB CAM36311.1  hypothetical protein [ <i>Thermobia domestica</i> ]           | CAM36311.1       | 9,00E-08 | 60       | 30/50      |
| 5  | CL3CONTIG3  | no blast match                                                                |                  |          | 0        |            |
| 6  | CL4CONTIG1  | no blast match                                                                |                  |          | 0        |            |
| 7  | CL5CONTIG1  | no blast match                                                                |                  |          | 0        |            |
| 8  | CL6CONTIG1  | GB AAX48872.1  L37a [ <i>Suberites domuncula</i> ]                            | AAX48872.1       | 9,00E-38 | 79       | 73/92      |
| 9  | CL7CONTIG1  | DBJ BAB33421.1  putative senescence-associated protein [ <i>Pisum sa...</i> ] | BAB33421.1       | 8,00E-09 | 73       | 30/41      |
| 10 | CL8CONTIG1  | REF XP_001495410.1  PREDICTED: similar to ribosomal protein S5 [...]          | XP_001495410.1   | 4,00E-52 | 86       | 99/115     |
| 11 | CL9CONTIG1  | no blast match                                                                |                  |          | 0        |            |
| 12 | CL10CONTIG1 | GB AAH53776.1  MGC64312 protein [ <i>Xenopus laevis</i> ]                     | AAH53776.1       | 1,00E-19 | 78       | 44/56      |
| 13 | CL11CONTIG1 | GB AAX30301.1  unknown [ <i>Schistosoma japonicum</i> ]                       | AAX30301.1       | 4,00E-22 | 89       | 49/55      |
| 14 | CL12CONTIG1 | GB AAY66953.1  ribosomal protein L36 [ <i>Ixodes scapularis</i> ]             | AAY66953.1       | 5,00E-22 | 66       | 48/72      |
| 15 | CL13CONTIG1 | GB ABD04168.1  activating transcription factor 4-like protein [A...]          | ABD04168.1       | 1,00E-11 | 34       | 40/115     |
| 16 | CL14CONTIG1 | REF NP_001041438.1  hypothetical protein LOC503325 [ <i>Rattus norve...</i> ] | NP_001041438.1   | 6,00E-11 | 58       | 25/43      |
| 17 | CL15CONTIG1 | REF XP_392691.2  PREDICTED: similar to Elongation factor 2 (EF-2...)          | XP_392691.2      | 9,00E-96 | 77       | 161/208    |
| 18 | CL16CONTIG1 | EMB CAJ80765.2  thrombospondin type 1 repeat-containing protein ...           | CAJ80765.2       | 4,00E-18 | 47       | 44/92      |
| 19 | CL17CONTIG1 | REF XP_781777.1  PREDICTED: similar to Ribosomal protein S2 [Str...]          | XP_781777.1      | 4,00E-56 | 83       | 104/125    |
| 20 | CL18CONTIG1 | no blast match                                                                |                  |          | 0        |            |
| 21 | CL18CONTIG2 | no blast match                                                                |                  |          | 0        |            |
| 22 | CL19CONTIG1 | REF NP_001080051.1  glucose regulated protein, 58kDa [ <i>Xenopus la...</i> ] | NP_001080051.1   | 1,00E-12 | 61       | 36/59      |
| 23 | CL20CONTIG1 | no blast match                                                                |                  |          | 0        |            |
| 24 | CL21CONTIG1 | GB AAN05584.1  ribosomal protein L30 [ <i>Argopecten irradians</i> ]          | AAN05584.1       | 3,00E-31 | 82       | 68/82      |
| 25 | CL22CONTIG1 | no blast match                                                                |                  |          | 0        |            |
| 26 | CL23CONTIG1 | no blast match                                                                |                  |          | 0        |            |
| 27 | CL24CONTIG1 | REF XP_780122.1  PREDICTED: hypothetical protein isoform 1 [Stro...]          | XP_780122.1      | 5,00E-28 | 65       | 54/82      |
| 28 | CL25CONTIG1 | REF XP_690132.2  PREDICTED: hypothetical protein LOC325699 [Dani...]          | XP_690132.2      | 1,00E-21 | 42       | 69/163     |
| 29 | CL25CONTIG2 | REF XP_690132.2  PREDICTED: hypothetical protein LOC325699 [Dani...]          | XP_690132.2      | 2,00E-17 | 39       | 54/136     |
| 30 | CL26CONTIG1 | REF NP_001016282.1  heat shock protein 90kDa alpha (cytosolic), ...           | NP_001016282.1   | 4,00E-39 | 70       | 78/111     |
| 31 | CL27CONTIG1 | no blast match                                                                |                  |          | 0        |            |
| 32 | CL28CONTIG1 | GB AAR31143.1  zebra precursor; HyZebra [ <i>Hydra magnipapillata</i> ]       | AAR31143.1       | 2,00E-23 | 44       | 48/109     |
| 33 | CL29CONTIG1 | REF XP_001200730.1  PREDICTED: hypothetical protein [Strongyloce...]          | XP_001200730.1   | 1,00E-13 | 92       | 38/41      |
| 34 | CL30CONTIG1 | no blast match                                                                |                  |          | 0        |            |
| 35 | CL31CONTIG1 | no blast match                                                                |                  |          | 0        |            |
| 36 | CL32CONTIG1 | REF XP_001147795.1  PREDICTED: similar to Ribosomal protein S6 [...]          | XP_001147795.1   | 3,00E-39 | 80       | 76/95      |
| 37 | CL33CONTIG1 | REF XP_971685.1  PREDICTED: similar to CG8983-PA, isoform A [Tri...]          | XP_971685.1      | 3,00E-97 | 50       | 185/368    |
| 38 | CL34CONTIG1 | no blast match                                                                |                  |          | 0        |            |
| 39 | CL35CONTIG1 | GB ABC25034.1  ribosomal protein S3 [ <i>Hydra vulgaris</i> ]                 | ABC25034.1       | 4,00E-23 | 96       | 50/52      |
| 40 | CL36CONTIG1 | GB AAX48848.1  L15 [ <i>Suberites domuncula</i> ]                             | AAX48848.1       | 3,00E-43 | 82       | 83/101     |
| 41 | CL37CONTIG1 | GB AAB01531.1  cyclophilin-A >gij1588025 prfj 2207414A cyclophilin            | AAB01531.1       | 1,00E-42 | 92       | 81/88      |
| 42 | CL38CONTIG1 | PDB 2IY1 B Chain B, Senp1 (Mutant) Full Length Sumo1 >gij1147948...           | 2IY1             | 6,00E-18 | 68       | 44/64      |
| 43 | CL39CONTIG1 | SP P17126 ACT_HYDAT Actin, non-muscle 6.2 >gij159254 gb AAA29205...           | P17126           | 1,00E-80 | 99       | 146/147    |
| 44 | CL40CONTIG1 | DBJ BAA94696.1  calmodulin [ <i>Chara corallina</i> ] >gij7594879 dbj BAA...  | BAA94696.1       | 4,00E-20 | 94       | 48/51      |
| 45 | CL41CONTIG1 | REF NP_001080379.1  cytochrome c-1 [ <i>Xenopus laevis</i> ] >gij28175293...  | NP_001080379.1   | 8,00E-20 | 66       | 44/66      |
| 46 | CL42CONTIG1 | no blast match                                                                |                  |          | 0        |            |
| 47 | CL43CONTIG1 | REF XP_001487046.1  hypothetical protein PGUG_00423 [ <i>Pichia guil...</i> ] | XP_001487046.1   | 2,00E-09 | 41       | 33/80      |
| 48 | CL44CONTIG1 | no blast match                                                                |                  |          | 0        |            |
| 49 | CL45CONTIG1 | DBJ BAF37942.1  Similar to ribosomal protein S23 [ <i>Oncorhynchus m...</i> ] | BAF37942.1       | 1,00E-48 | 93       | 93/99      |
| 50 | CL46CONTIG1 | no blast match                                                                |                  |          | 0        |            |
| 51 | CL47CONTIG1 | no blast match                                                                |                  |          | 0        |            |
| 52 | CL48CONTIG1 | GB EAT45815.1  conserved hypothetical protein [ <i>Aedes aegypti</i> ]        | EAT45815.1       | 7,00E-27 | 56       | 56/99      |
| 53 | CL49CONTIG1 | no blast match                                                                |                  |          | 0        |            |
| 54 | CL50CONTIG1 | REF XP_796390.1  PREDICTED: hypothetical protein [Strongylocentr...]          | XP_796390.1      | 2,00E-10 | 88       | 31/35      |
| 55 | CL51CONTIG1 | no blast match                                                                |                  |          | 0        |            |
| 56 | CL52CONTIG1 | GB AAX11340.1  ribosomal protein L28 [ <i>Halotilus asinina</i> ]             | AAX11340.1       | 6,00E-13 | 56       | 41/73      |
| 57 | CL53CONTIG1 | SP P49395 RS3A_APLCA 40S ribosomal protein S3a (Lysine-rich prot...)          | P49395           | 1,00E-46 | 69       | 90/130     |
| 58 | CL54CONTIG1 | GB ABA42878.1  small heat shock protein [uncultured cnidarian]                | ABA42878.1       | 2,00E-15 | 37       | 52/137     |
| 59 | CL55CONTIG1 | no blast match                                                                |                  |          | 0        |            |
| 60 | CL55CONTIG2 | no blast match                                                                |                  |          | 0        |            |
| 61 | CL56CONTIG1 | REF XP_554103.2  ENSANGP00000025683 [ <i>Anopheles gambiae</i> str. PEST...]  | XP_554103.2      | 3,00E-08 | 50       | 28/55      |
| 62 | CL57CONTIG1 | DBJ BAE71215.1  putative 60S ribosomal protein L1 [ <i>Trifolium pra...</i> ] | BAE71215.1       | 1,00E-46 | 57       | 99/171     |
| 63 | CL58CONTIG1 | no blast match                                                                |                  |          | 0        |            |
| 64 | CL59CONTIG1 | SP P46088 GST_OMMSL Glutathione S-transferase (GST class-sigma) ...           | P46088           | 5,00E-08 | 35       | 39/111     |
| 65 | CL60CONTIG1 | REF XP_967635.1  PREDICTED: similar to CG3395-PA, isoform A isof...           | XP_967635.1      | 8,00E-33 | 85       | 69/81      |
| 66 | CL61CONTIG1 | REF XP_535211.1  PREDICTED: similar to NADH dehydrogenase (ubiqui...)         | XP_535211.1      | 7,00E-19 | 54       | 42/77      |
| 67 | CL62CONTIG1 | EMB CAG06843.1  unnamed protein product [ <i>Tetraodon nigroviridis</i> ]     | CAG06843.1       | 3,00E-10 | 55       | 34/61      |
| 68 | CL63CONTIG1 | REF XP_001500635.1  PREDICTED: similar to KIAA0098 protein [Equu...]          | XP_001500635.1   | 5,00E-08 | 93       | 30/32      |
| 69 | CL64CONTIG1 | EMB CAD91421.1  ribosomal protein L5 [ <i>Crassostrea gigas</i> ]             | CAD91421.1       | 4,00E-25 | 74       | 56/75      |
| 70 | CL65CONTIG1 | no blast match                                                                |                  |          | 0        |            |
| 71 | CL66CONTIG1 | no blast match                                                                |                  |          | 0        |            |
| 72 | CL67CONTIG1 | EMB CAJ33888.1  putative serine protease inhibitor [ <i>Hydra vulgaris</i> ]  | CAJ33888.1       | 1,00E-24 | 84       | 49/58      |
| 73 | CL68CONTIG1 | no blast match                                                                |                  |          | 0        |            |

|     |              |                                                                     |                |          |     |         |
|-----|--------------|---------------------------------------------------------------------|----------------|----------|-----|---------|
| 74  | CL69CONTIG1  | REF XP_001363488.1  PREDICTED: similar to p34-Arc [Monodelphis d... | XP_001363488.1 | 2,00E-54 | 80  | 102/127 |
| 75  | CL70CONTIG1  | REF XP_001521468.1  PREDICTED: hypothetical protein [Ornithorhyn... | XP_001521468.1 | 6,00E-13 | 41  | 28/67   |
| 76  | CL71CONTIG1  | no blast match                                                      |                |          | 0   |         |
| 77  | CL72CONTIG1  | GB ABC25032.1  ribosomal protein L35A [Hydra vulgaris]              | ABC25032.1     | 7,00E-50 | 97  | 97/100  |
| 78  | CL73CONTIG1  | EMB CAI44701.1  selenoprotein M [Suberites domuncula]               | CAI44701.1     | 2,00E-11 | 49  | 34/69   |
| 79  | CL74CONTIG1  | no blast match                                                      |                |          | 0   |         |
| 80  | CL75CONTIG1  | EMB CAG04219.1  unnamed protein product [Tetraodon nigroviridis]    | CAG04219.1     | 7,00E-13 | 65  | 36/55   |
| 81  | CL76CONTIG1  | EMB CAA08791.1  ribosomal protein L18a [Podocoryne carnea]          | CAA08791.1     | 3,00E-30 | 81  | 61/75   |
| 82  | CL77CONTIG1  | REF XP_785610.1  PREDICTED: similar to ribosomal protein S10 iso... | XP_785610.1    | 3,00E-20 | 59  | 47/79   |
| 83  | CL78CONTIG1  | no blast match                                                      |                |          | 0   |         |
| 84  | CL79CONTIG1  | no blast match                                                      |                |          | 0   |         |
| 85  | CL80CONTIG1  | REF XP_001483928.1  60S ribosomal protein L37 [Pichia guilliermo... | XP_001483928.1 | 1,00E-24 | 81  | 49/60   |
| 86  | CL81CONTIG1  | REF YP_502335.1  hypothetical protein Mhun_0865 [Methanospirillu... | YP_502335.1    | 1,00E-08 | 30  | 33/108  |
| 87  | CL82CONTIG1  | GB EAZ41147.1  hypothetical protein OsJ_024630 [Oryza sativa (ja... | EAZ41147.1     | 4,00E-12 | 42  | 36/85   |
| 88  | CL83CONTIG1  | REF XP_684064.1  PREDICTED: hypothetical protein [Danio rerio]      | XP_684064.1    | 5,00E-08 | 49  | 28/57   |
| 89  | CL84CONTIG1  | GB AA09935.1  GTP-binding protein [Aurelia aurita]                  | AA09935.1      | 2,00E-28 | 49  | 69/140  |
| 90  | CL85CONTIG1  | GB AAW25342.1  SJCHGC02792 protein [Schistosoma japonicum]          | AAW25342.1     | 2,00E-20 | 67  | 38/56   |
| 91  | CL86CONTIG1  | no blast match                                                      |                |          | 0   |         |
| 92  | CL87CONTIG1  | GB AAN52389.1  ribosomal protein S17 [Branchiostoma belcheri]       | AAN52389.1     | 3,00E-50 | 81  | 96/118  |
| 93  | CL88CONTIG1  | EMB CAC19490.1  putative ribosomal protein L27 [Stichodactyla he... | CAC19490.1     | 8,00E-44 | 73  | 85/116  |
| 94  | CL89CONTIG1  | EMB CAG12069.1  unnamed protein product [Tetraodon nigroviridis]    | CAG12069.1     | 4,00E-33 | 87  | 68/78   |
| 95  | CL90CONTIG1  | no blast match                                                      |                |          | 0   |         |
| 96  | CL91CONTIG1  | REF NP_001037135.1  ribosomal protein L7 [Bombyx mori] >gj 54609... | NP_001037135.1 | 1,00E-31 | 76  | 66/86   |
| 97  | CL92CONTIG1  | GB AAN77896.1  ribosomal protein S7 [Petromyzon marinus]            | AAN77896.1     | 4,00E-38 | 70  | 80/113  |
| 98  | CL93CONTIG1  | REF XP_418537.1  PREDICTED: similar to xylokainase homolog [Gal...  | XP_418537.1    | 1,00E-32 | 45  | 78/172  |
| 99  | CL94CONTIG1  | no blast match                                                      |                |          | 0   |         |
| 100 | CL95CONTIG1  | no blast match                                                      |                |          | 0   |         |
| 101 | CL96CONTIG1  | no blast match                                                      |                |          | 0   |         |
| 102 | CL97CONTIG1  | EMB CAF98037.1  unnamed protein product [Tetraodon nigroviridis]    | CAF98037.1     | 6,00E-22 | 44  | 54/121  |
| 103 | CL98CONTIG1  | no blast match                                                      |                |          | 0   |         |
| 104 | CL99CONTIG1  | REF XP_001518180.1  PREDICTED: similar to alpha NAC/1.9.2. prote... | XP_001518180.1 | 1,00E-35 | 68  | 80/116  |
| 105 | CL100CONTIG1 | EMB CAN70636.1  hypothetical protein [Vitis vinifera]               | CAN70636.1     | 1,00E-37 | 67  | 78/115  |
| 106 | CL101CONTIG1 | SP Q27052 FCA1_TRYRA Flagellar calcium-binding protein >gj 11776... | Q27052         | 2,00E-07 | 38  | 27/70   |
| 107 | CL102CONTIG1 | no blast match                                                      |                |          | 0   |         |
| 108 | CL103CONTIG1 | REF NP_001006472.1  CD151 antigen [Gallus gallus] >gj 53135766[e... | NP_001006472.1 | 9,00E-09 | 32  | 30/91   |
| 109 | CL104CONTIG1 | REF XP_785807.2  PREDICTED: similar to apical endosomal glycopro... | XP_785807.2    | 6,00E-07 | 39  | 32/81   |
| 110 | CL105CONTIG1 | GB AAR31143.1  zebra precursor, HyZebra [Hydra magnipapillata]      | AAR31143.1     | 6,00E-25 | 46  | 53/114  |
| 111 | CL106CONTIG1 | REF XP_001201373.1  PREDICTED: hypothetical protein [Strongyloce... | XP_001201373.1 | 8,00E-13 | 27  | 57/205  |
| 112 | CL107CONTIG1 | REF XP_001196080.1  PREDICTED: similar to vesicle-associated pro... | XP_001196080.1 | 3,00E-07 | 36  | 38/104  |
| 113 | CL108CONTIG1 | REF XP_780386.2  PREDICTED: hypothetical protein [Strongylocentr... | XP_780386.2    | 3,00E-09 | 35  | 42/118  |
| 114 | CL109CONTIG1 | no blast match                                                      |                |          | 0   |         |
| 115 | CL110CONTIG1 | REF NP_001086867.1  MGC83668 protein [Xenopus laevis] >gj 504155... | NP_001086867.1 | 4,00E-24 | 40  | 57/141  |
| 116 | CL111CONTIG1 | SP Q08699 RS14_PODCA 40S ribosomal protein S14 >gj 396252 emb CA... | Q08699         | 1,00E-68 | 93  | 131/140 |
| 117 | CL112CONTIG1 | no blast match                                                      |                |          | 0   |         |
| 118 | CL113CONTIG1 | no blast match                                                      |                |          | 0   |         |
| 119 | CL114CONTIG1 | REF NP_001026019.1  integrin beta 4 binding protein [Gallus gall... | NP_001026019.1 | 3,00E-71 | 84  | 129/152 |
| 120 | CL115CONTIG1 | GB AAQ13347.1 U60651_1 ribosomal protein L10 [Hydra vulgaris]       | AAQ13347.1     | 1,00E-37 | 98  | 73/74   |
| 121 | CL116CONTIG1 | GB AAO86696.1  selenoprotein W1 [Danio rerio]                       | AAO86696.1     | 5,00E-19 | 54  | 46/84   |
| 122 | CL117CONTIG1 | no blast match                                                      |                |          | 0   |         |
| 123 | CL118CONTIG1 | no blast match                                                      |                |          | 0   |         |
| 124 | CL119CONTIG1 | no blast match                                                      |                |          | 0   |         |
| 125 | CL120CONTIG1 | no blast match                                                      |                |          | 0   |         |
| 126 | CL121CONTIG1 | GB EAT45962.1  coupling factor, putative [Aedes aegypti]            | EAT45962.1     | 5,00E-08 | 41  | 35/84   |
| 127 | CL122CONTIG1 | EMB CAL36995.1  chitinase 2 [Hydractinia echinata]                  | CAL36995.1     | 2,00E-14 | 56  | 32/57   |
| 128 | CL123CONTIG1 | GB AAX48842.1  L10a [Suberites domuncula]                           | AAX48842.1     | 2,00E-78 | 76  | 143/188 |
| 129 | CL124CONTIG1 | no blast match                                                      |                |          | 0   |         |
| 130 | CL125CONTIG1 | GB ABC25025.1  extracellular copper/zinc superoxide dismutase [H... | ABC25025.1     | 9,00E-16 | 90  | 39/43   |
| 131 | CL126CONTIG1 | no blast match                                                      |                |          | 0   |         |
| 132 | CL127CONTIG1 | GB AAA92361.2  metalloproteinase 1 [Hydra vulgaris]                 | AAA92361.2     | 1,00E-42 | 86  | 80/92   |
| 133 | CL128CONTIG1 | SP P17126 ACT_HYDAT Actin, non-muscle 6.2 >gj 159254 gb AAA29205... | P17126         | 1,00E-42 | 95  | 85/89   |
| 134 | CL129CONTIG1 | no blast match                                                      |                |          | 0   |         |
| 135 | CL130CONTIG1 | no blast match                                                      |                |          | 0   |         |
| 136 | CL131CONTIG1 | SP Q7TNV0 DEK_MOUSE Protein DEK >gj 33416321 gb AAH55451.1  DEK ... | Q7TNV0         | 4,00E-27 | 42  | 59/140  |
| 137 | CL132CONTIG1 | no blast match                                                      |                |          | 0   |         |
| 138 | CL133CONTIG1 | no blast match                                                      |                |          | 0   |         |
| 139 | CL134CONTIG1 | GB ABM55524.1  vacuolar ATPase G subunit-like protein [Maconelli... | ABM55524.1     | 8,00E-14 | 48  | 40/83   |
| 140 | CL135CONTIG1 | no blast match                                                      |                |          | 0   |         |
| 141 | CL137CONTIG1 | no blast match                                                      |                |          | 0   |         |
| 142 | CL138CONTIG1 | REF XP_788351.2  PREDICTED: similar to myb binding protein (P160... | XP_788351.2    | 4,00E-20 | 27  | 66/240  |
| 143 | CL139CONTIG1 | REF XP_716284.1  putative ADP-ribosylation factor [Candida albic... | XP_716284.1    | 3,00E-46 | 52  | 60/114  |
| 144 | CL140CONTIG1 | GB ABR19841.1  minicollagen-15 [Hydra vulgaris]                     | ABR19841.1     | 8,00E-41 | 83  | 72/86   |
| 145 | CL141CONTIG1 | REF XP_001120773.1  PREDICTED: similar to CG17266-PA [Apis melli... | XP_001120773.1 | 4,00E-40 | 80  | 76/95   |
| 146 | CL142CONTIG1 | REF XP_001191061.1  PREDICTED: hypothetical protein, partial [St... | XP_001191061.1 | 1,00E-06 | 31  | 26/82   |
| 147 | CL144CONTIG1 | GB AAN52376.1  ribosomal protein L23a [Branchiostoma belcheri]      | AAN52376.1     | 8,00E-46 | 74  | 92/123  |
| 148 | CL145CONTIG1 | no blast match                                                      |                |          | 0   |         |
| 149 | CL146CONTIG1 | no blast match                                                      |                |          | 0   |         |
| 150 | CL147CONTIG1 | DBJ BAE31061.1  unnamed protein product [Mus musculus]              | BAE31061.1     | 4,00E-14 | 35  | 39/111  |
| 151 | CL148CONTIG1 | no blast match                                                      |                |          | 0   |         |
| 152 | CL149CONTIG1 | no blast match                                                      |                |          | 0   |         |
| 153 | CL150CONTIG1 | no blast match                                                      |                |          | 0   |         |
| 154 | CL151CONTIG1 | REF XP_001474742.1  PREDICTED: hypothetical protein [Mus musculu... | XP_001474742.1 | 1,00E-15 | 75  | 43/57   |
| 155 | CL152CONTIG1 | REF NP_001091148.1  hypothetical protein LOC100036901 [Xenopus l... | NP_001091148.1 | 1,00E-11 | 32  | 45/139  |
| 156 | CL153CONTIG1 | GB AAH45916.1  Zgc:77734 [Danio rerio]                              | AAH45916.1     | 2,00E-23 | 67  | 53/79   |
| 157 | CL154CONTIG1 | EMB CAG01631.1  unnamed protein product [Tetraodon nigroviridis]    | CAG01631.1     | 4,00E-27 | 75  | 65/86   |
| 158 | CL155CONTIG1 | no blast match                                                      |                |          | 0   |         |
| 159 | CL156CONTIG1 | REF XP_623766.2  PREDICTED: similar to Hsp70/Hsp90 organizing pr... | XP_623766.2    | 5,00E-66 | 55  | 128/230 |
| 160 | CL157CONTIG1 | EMB CAB88388.1  L12 ribosomal protein [Hydra vulgaris]              | CAB88388.1     | 1,00E-56 | 97  | 72/74   |
| 161 | CL158CONTIG1 | GB EDL81715.1  rCG20808, isoform CRA_b [Rattus norvegicus]          | EDL81715.1     | 1,00E-25 | 100 | 59/59   |
| 162 | CL159CONTIG1 | no blast match                                                      |                |          | 0   |         |
| 163 | CL160CONTIG1 | REF XP_001494750.1  PREDICTED: similar to translocation protein ... | XP_001494750.1 | 1,00E-29 | 45  | 72/160  |

|     |              |                                                                     |                |          |    |         |
|-----|--------------|---------------------------------------------------------------------|----------------|----------|----|---------|
| 164 | CL161CONTIG1 | GB AAX08983.1  peptidylprolyl isomerase B precursor [Bos taurus]... | AAX08983.1     | 3,00E-63 | 64 | 123/192 |
| 165 | CL162CONTIG1 | no blast match                                                      |                |          | 0  |         |
| 166 | CL163CONTIG1 | GB AAO43049.1  40S ribosomal protein [Perinereis aiuhitensis]       | AAO43049.1     | 3,00E-48 | 81 | 91/112  |
| 167 | CL164CONTIG1 | no blast match                                                      |                |          | 0  |         |
| 168 | CL165CONTIG1 | REF NP_001040289.1  prohibitin protein WPH [Bombyx mori] >gij872... | NP_001040289.1 | 7,00E-45 | 70 | 91/129  |
| 169 | CL166CONTIG1 | no blast match                                                      |                |          | 0  |         |
| 170 | CL167CONTIG1 | REF NP_001079738.1  hypothetical protein LOC379427 [Xenopus laev... | NP_001079738.1 | 2,00E-07 | 51 | 28/54   |
| 171 | CL168CONTIG1 | no blast match                                                      |                |          | 0  |         |
| 172 | CL169CONTIG1 | no blast match                                                      |                |          | 0  |         |
| 173 | CL170CONTIG1 | no blast match                                                      |                |          | 0  |         |
| 174 | CL171CONTIG1 | no blast match                                                      |                |          | 0  |         |
| 175 | CL172CONTIG1 | no blast match                                                      |                |          | 0  |         |
| 176 | CL173CONTIG1 | no blast match                                                      |                |          | 0  |         |
| 177 | CL174CONTIG1 | no blast match                                                      |                |          | 0  |         |
| 178 | CL175CONTIG1 | GB AAO11519.1  ribosomal protein S19 [Chlamys farreri]              | AAO11519.1     | 1,00E-27 | 70 | 56/79   |
| 179 | CL176CONTIG1 | GB AAR19205.1  type II transmembrane C-type lectin [Hydra magnip... | AAR19205.1     | 2,00E-41 | 92 | 75/81   |
| 180 | CL177CONTIG1 | REF XP_780458.1  PREDICTED: similar to Polymerase (RNA) II (DNA ... | XP_780458.1    | 2,00E-47 | 88 | 83/94   |
| 181 | CL178CONTIG1 | no blast match                                                      |                |          | 0  |         |
| 182 | CL179CONTIG1 | no blast match                                                      |                |          | 0  |         |
| 183 | CL180CONTIG1 | REF XP_001377662.1  PREDICTED: hypothetical protein [Monodelphis... | XP_001377662.1 | 5,00E-08 | 34 | 33/95   |
| 184 | CL182CONTIG1 | no blast match                                                      |                |          | 0  |         |
| 185 | CL183CONTIG1 | no blast match                                                      |                |          | 0  |         |
| 186 | CL184CONTIG1 | no blast match                                                      |                |          | 0  |         |
| 187 | CL185CONTIG1 | GB ABN11959.1  putative chaperonin subunit 6a zeta [Maconellicoc... | ABN11959.1     | 1,00E-14 | 75 | 37/49   |
| 188 | CL187CONTIG1 | no blast match                                                      |                |          | 0  |         |
| 189 | CL188CONTIG1 | GB AAX09924.1  DnaJ-like protein [Aurelia aurita]                   | AAX09924.1     | 1,00E-22 | 72 | 50/69   |
| 190 | CL189CONTIG1 | no blast match                                                      |                |          | 0  |         |
| 191 | CL190CONTIG1 | no blast match                                                      |                |          | 0  |         |
| 192 | CL191CONTIG1 | no blast match                                                      |                |          | 0  |         |
| 193 | CL192CONTIG1 | REF XP_312008.3  ENSANGP00000018753 [Anopheles gambiae str. PEST... | XP_312008.3    | 7,00E-26 | 61 | 62/101  |
| 194 | CL193CONTIG1 | no blast match                                                      |                |          | 0  |         |
| 195 | CL194CONTIG1 | SP Q94587 TCTP_HYDAT Translationally-controlled tumor protein ho... | Q94587         | 1,00E-48 | 93 | 91/97   |
| 196 | CL196CONTIG1 | no blast match                                                      |                |          | 0  |         |
| 197 | CL197CONTIG1 | no blast match                                                      |                |          | 0  |         |
| 198 | CL198CONTIG1 | REF XP_453843.1  unnamed protein product [Kluyveromyces lactis] ... | XP_453843.1    | 1,00E-11 | 55 | 37/67   |
| 199 | CL199CONTIG1 | REF XP_001493068.1  PREDICTED: similar to elongation factor SIII... | XP_001493068.1 | 1,00E-16 | 78 | 41/52   |
| 200 | CL200CONTIG1 | REF NP_001017583.1  hypothetical protein LOC550245 [Danio rerio]... | NP_001017583.1 | 4,00E-28 | 54 | 59/109  |
| 201 | CL201CONTIG1 | no blast match                                                      |                |          | 0  |         |
| 202 | CL202CONTIG1 | no blast match                                                      |                |          | 0  |         |
| 203 | CL203CONTIG1 | no blast match                                                      |                |          | 0  |         |
| 204 | CL204CONTIG1 | REF NP_001080153.1  actin related protein 2/3 complex, subunit 1... | NP_001080153.1 | 3,00E-28 | 61 | 50/81   |
| 205 | CL206CONTIG1 | no blast match                                                      |                |          | 0  |         |
| 206 | CL207CONTIG1 | no blast match                                                      |                |          | 0  |         |
| 207 | CL208CONTIG1 | REF XP_792994.1  PREDICTED: similar to muscle protein 20-like pr... | XP_792994.1    | 2,00E-18 | 83 | 44/53   |
| 208 | CL209CONTIG1 | SP P38984 RSSA_CHLVR 40S ribosomal protein SA (p40) (33 kDa lami... | P38984         | 8,00E-52 | 81 | 94/115  |
| 209 | CL210CONTIG1 | no blast match                                                      |                |          | 0  |         |
| 210 | CL211CONTIG1 | REF YP_563466.1  hypothetical protein Sden_2463 [Shewanella deni... | YP_563466.1    | 4,00E-10 | 43 | 43/98   |
| 211 | CL212CONTIG1 | GB AAT97079.1  translocon associated protein gamma subunit-like ... | AAT97079.1     | 1,00E-14 | 59 | 35/59   |
| 212 | CL213CONTIG1 | no blast match                                                      |                |          | 0  |         |
| 213 | CL214CONTIG1 | no blast match                                                      |                |          | 0  |         |
| 214 | CL215CONTIG1 | REF XP_697767.2  PREDICTED: similar to procathepsin B [Danio rerio] | XP_697767.2    | 9,00E-17 | 81 | 30/37   |
| 215 | CL216CONTIG1 | REF NP_001006703.1  four and a half LIM domains 1 [Xenopus tropl... | NP_001006703.1 | 2,00E-11 | 43 | 30/69   |
| 216 | CL217CONTIG1 | no blast match                                                      |                |          | 0  |         |
| 217 | CL218CONTIG1 | REF NP_001039500.1  hypothetical protein LOC509522 [Bos taurus] ... | NP_001039500.1 | 4,00E-12 | 41 | 33/80   |
| 218 | CL219CONTIG1 | EMB CAJ33888.1  putative serine protease inhibitor [Hydra vulgaris] | CAJ33888.1     | 2,00E-40 | 92 | 75/81   |
| 219 | CL220CONTIG1 | DBJ BAB22235.1  unnamed protein product [Mus musculus]              | BAB22235.1     | 4,00E-21 | 61 | 49/80   |
| 220 | CL221CONTIG1 | REF XP_318019.3  ENSANGP00000010754 [Anopheles gambiae str. PEST... | XP_318019.3    | 7,00E-54 | 71 | 95/133  |
| 221 | CL222CONTIG1 | no blast match                                                      |                |          | 0  |         |
| 222 | CL223CONTIG1 | DBJ BAC92690.1  epitheliopptide HYM-301 [Hydra magnipapillata]      | BAC92690.1     | 3,00E-13 | 54 | 43/79   |
| 223 | CL224CONTIG1 | REF XP_783992.2  PREDICTED: similar to sorcin [Strongylocentrotu... | XP_783992.2    | 6,00E-42 | 71 | 87/122  |
| 224 | CL225CONTIG1 | GB AAA29218.2  tyrosine kinase receptor [Hydra vulgaris]            | AAA29218.2     | 3,00E-07 | 32 | 34/105  |
| 225 | CL226CONTIG1 | EMB CAJ65510.3  HyTSR1 protein [Hydra vulgaris]                     | CAJ65510.3     | 2,00E-06 | 34 | 33/95   |
| 226 | CL227CONTIG1 | GB AAX09926.1  putative tyrosine-rich heat shock protein [Aureli... | AAX09926.1     | 3,00E-17 | 70 | 41/58   |
| 227 | CL228CONTIG1 | GB AAX48841.1  L10e/P0 [Suberites domuncula]                        | AAX48841.1     | 4,00E-22 | 69 | 50/72   |
| 228 | CL229CONTIG1 | no blast match                                                      |                |          | 0  |         |
| 229 | CL230CONTIG1 | no blast match                                                      |                |          | 0  |         |
| 230 | CL231CONTIG1 | no blast match                                                      |                |          | 0  |         |
| 231 | CL232CONTIG1 | EMB CAA15924.1  SPAC3G9.15c [Schizosaccharomyces pombe]             | CAA15924.1     | 4,00E-08 | 52 | 29/55   |
| 232 | CL233CONTIG1 | GB ABF18043.1  60S ribosomal protein L38 [Aedes aegypti] >gij108... | ABF18043.1     | 2,00E-17 | 74 | 44/59   |
| 233 | CL234CONTIG1 | REF XP_001338556.1  PREDICTED: hypothetical protein [Danio rerio]   | XP_001338556.1 | 1,00E-13 | 40 | 46/115  |
| 234 | CL235CONTIG1 | REF XP_310323.4  ENSANGP00000015846 [Anopheles gambiae str. PEST... | XP_310323.4    | 1,00E-49 | 97 | 92/94   |
| 235 | CL236CONTIG1 | EMB CAM25755.1  ribosomal protein L11 [Mus musculus]                | CAM25755.1     | 5,00E-38 | 81 | 76/93   |
| 236 | CL237CONTIG1 | no blast match                                                      |                |          | 0  |         |
| 237 | CL238CONTIG1 | GB AAM18885.1 AF391293_2 unknown [Branchiostoma floridae]           | AAM18885.1     | 3,00E-10 | 80 | 29/36   |
| 238 | CL239CONTIG1 | GB AAT00507.1  Kazal-like serine protease inhibitor EPI8 [Phytop... | AAT00507.1     | 2,00E-08 | 39 | 27/68   |
| 239 | CL240CONTIG1 | no blast match                                                      |                |          | 0  |         |
| 240 | CL241CONTIG1 | no blast match                                                      |                |          | 0  |         |
| 241 | CV284315.1   | REF NP_001089378.1  hypothetical protein LOC734428 [Xenopus laev... | NP_001089378.1 | 7,00E-32 | 60 | 38/63   |
| 242 | CV284316.1   | REF NP_001006694.1  malate dehydrogenase 1, NAD (soluble) [Xenop... | NP_001006694.1 | 2,00E-33 | 62 | 72/115  |
| 243 | CV284320.1   | REF NP_610932.1  Transport and Golgi organization 7 CG8309-PA [D... | NP_610932.1    | 2,00E-11 | 38 | 32/83   |
| 244 | CV284323.1   | REF XP_001380175.1  PREDICTED: similar to KIAA1611 protein [Mono... | XP_001380175.1 | 2,00E-25 | 41 | 56/135  |
| 245 | CV284324.1   | REF XP_001366707.1  PREDICTED: hypothetical protein [Monodelphis... | XP_001366707.1 | 7,00E-24 | 85 | 55/64   |
| 246 | CV284326.1   | REF NP_508154.2  Nematode AStacin protease family member (nas-15... | NP_508154.2    | 5,00E-06 | 41 | 31/75   |
| 247 | CV284328.1   | no blast match                                                      |                |          | 0  |         |
| 248 | CV284329.1   | REF XP_975859.1  PREDICTED: similar to 60S acidic ribosomal prot... | XP_975859.1    | 6,00E-12 | 75 | 40/53   |
| 249 | CV284335.1   | no blast match                                                      |                |          | 0  |         |
| 250 | CV284337.1   | DBJ BAA74509.1  actin-binding protein ABP-280 [Hydra magnipapill... | BAA74509.1     | 1,00E-11 | 39 | 35/88   |
| 251 | CV284342.1   | no blast match                                                      |                |          | 0  |         |
| 252 | CV284344.1   | no blast match                                                      |                |          | 0  |         |
| 253 | CV284347.1   | REF NP_001080221.1  coatomer protein complex, subunit beta 2 (be... | NP_001080221.1 | 4,00E-13 | 41 | 44/107  |

|     |            |                                                                      |                |          |    |         |
|-----|------------|----------------------------------------------------------------------|----------------|----------|----|---------|
| 254 | CV284349.1 | REF XP_971367.1  PREDICTED: similar to CG15786-PA [Tribolium cas...  | XP_971367.1    | 3,00E-31 | 45 | 72/159  |
| 255 | CV284352.1 | no blast match                                                       |                |          | 0  |         |
| 256 | CV284353.1 | REF XP_001331697.1  PREDICTED: hypothetical protein [Danio rerio]    | XP_001331697.1 | 2,00E-10 | 76 | 29/38   |
| 257 | CV284356.1 | SP P37380 RL17_PODCA 60S ribosomal protein L17 (L23) >gij312500 ...  | P37380         | 3,00E-48 | 84 | 95/112  |
| 258 | CV284358.1 | GB AA62427.1  ribosomal protein L8 [Lysiphlebus testaceipes]         | AA62427.1      | 1,00E-28 | 76 | 62/81   |
| 259 | CV284359.1 | no blast match                                                       |                |          | 0  |         |
| 260 | CV284360.1 | REF XP_970528.1  PREDICTED: similar to CG14210-PA [Tribolium cas...  | XP_970528.1    | 1,00E-09 | 48 | 36/74   |
| 261 | CV284362.1 | REF XP_797203.2  PREDICTED: similar to rhamnose-binding lectin (...) | XP_797203.2    | 2,00E-24 | 45 | 60/132  |
| 262 | CV284370.1 | no blast match                                                       |                |          | 0  |         |
| 263 | CV284381.1 | REF XP_001375174.1  PREDICTED: similar to THUMP domain containin...  | XP_001375174.1 | 9,00E-45 | 45 | 89/194  |
| 264 | CV284385.1 | no blast match                                                       |                |          | 0  |         |
| 265 | CV284393.1 | REF XP_001507485.1  PREDICTED: similar to mitochondrial complex ...  | XP_001507485.1 | 9,00E-19 | 81 | 45/55   |
| 266 | CV284394.1 | REF XP_536910.2  PREDICTED: similar to major vault protein [Canis... | XP_536910.2    | 3,00E-23 | 63 | 56/88   |
| 267 | CV284396.1 | REF XP_001265199.1  60S ribosomal protein L15 [Neosartorya fisch...  | XP_001265199.1 | 8,00E-12 | 81 | 31/38   |
| 268 | CV284397.1 | no blast match                                                       |                |          | 0  |         |
| 269 | CV284404.1 | SP Q4PM47 RS29_IXOSC 40S ribosomal protein S29 >gij67083965 gb A...  | Q4PM47         | 2,00E-20 | 75 | 41/54   |
| 270 | CV284408.1 | GB EAT45815.1  conserved hypothetical protein [Aedes aegypti]        | EAT45815.1     | 4,00E-13 | 57 | 35/61   |
| 271 | CV284409.1 | REF XP_781777.1  PREDICTED: similar to Ribosomal protein S2 [Str...  | XP_781777.1    | 6,00E-08 | 49 | 38/77   |
| 272 | CV284413.1 | no blast match                                                       |                |          | 0  |         |
| 273 | CV284414.1 | REF NP_001026431.1  uridine monophosphate synthase [Gallus gallu...  | NP_001026431.1 | 1,00E-27 | 50 | 59/116  |
| 274 | CV284417.1 | GB AAW27025.1  SJCHGC02793 protein [Schistosoma japonicum]           | AAW27025.1     | 3,00E-18 | 78 | 44/56   |
| 275 | CV284419.1 | no blast match                                                       |                |          | 0  |         |
| 276 | CV284425.1 | no blast match                                                       |                |          | 0  |         |
| 277 | CV284427.1 | REF NP_001080733.1  nuclear RNA helicase [Xenopus laevis] >gij28...  | NP_001080733.1 | 1,00E-13 | 82 | 38/46   |
| 278 | CV284430.1 | no blast match                                                       |                |          | 0  |         |
| 279 | CV284438.1 | EMBL CAJ33888.1  putative serine protease inhibitor [Hydra vulgaris] | CAJ33888.1     | 2,00E-46 | 91 | 82/90   |
| 280 | CV284439.1 | no blast match                                                       |                |          | 0  |         |
| 281 | CV284453.1 | GB AA48879.1  S3a [Suberites domuncula]                              | AA48879.1      | 2,00E-65 | 70 | 119/168 |
| 282 | CV284455.1 | GB EAU84863.1  hypothetical protein CC1G_00382 [Coprinopsis cine...  | EAU84863.1     | 4,00E-25 | 67 | 59/87   |
| 283 | CV284458.1 | SP Q33845 COX3_ARTSA Cytochrome c oxidase subunit 3 (Cytochrome ...  | Q33845         | 3,00E-12 | 89 | 34/38   |
| 284 | CV284464.1 | GB AAP88387.1  actin [Chlamydia farreri]                             | AAP88387.1     | 4,00E-72 | 98 | 136/138 |
| 285 | CV284470.1 | GB ABD04179.1  60S ribosomal protein L26-like protein [Anthopleu...  | ABD04179.1     | 2,00E-23 | 74 | 52/70   |
| 286 | CV284474.1 | GB AAA29918.1  alpha tubulin >gij56758676 gb AAW27478.1  SJCHGC0...  | AAA29918.1     | 1,00E-20 | 92 | 48/52   |
| 287 | CV284480.1 | SP Q4VUZ1 RHCG_ONCMY Ammonium transporter Rh type C (Rh family t...  | Q4VUZ1         | 7,00E-11 | 41 | 41/100  |
| 288 | CV284487.1 | GB EAT40263.1  SEC63 protein, putative [Aedes aegypti]               | EAT40263.1     | 7,00E-37 | 64 | 76/118  |
| 289 | CV284488.1 | GB AAW26562.1  SJCHGC09076 protein [Schistosoma japonicum]           | AAW26562.1     | 3,00E-12 | 58 | 39/67   |
| 290 | CV284495.1 | REF NP_511178.1  enoyl Coenzyme A hydratase, short chain, 1, mit...  | NP_511178.1    | 3,00E-19 | 52 | 49/94   |
| 291 | CV284496.1 | GB EAX07023.1  ribosomal protein S8, isoform CRA_a [Homo sapiens]    | EAX07023.1     | 4,00E-33 | 73 | 65/89   |
| 292 | CV284502.1 | no blast match                                                       |                |          | 0  |         |
| 293 | CV284508.1 | REF XP_001508639.1  PREDICTED: hypothetical protein [Ornithorhyn...  | XP_001508639.1 | 5,00E-24 | 50 | 57/113  |
| 294 | CV284512.1 | no blast match                                                       |                |          | 0  |         |
| 295 | CV284521.1 | REF XP_001199603.1  PREDICTED: similar to Expressed sequence AI4...  | XP_001199603.1 | 2,00E-13 | 60 | 33/55   |
| 296 | CV284523.1 | no blast match                                                       |                |          | 0  |         |
| 297 | CV284532.1 | GB EAT36156.1  glutathione s-transferase [Aedes aegypti]             | EAT36156.1     | 1,00E-07 | 46 | 30/65   |
| 298 | CV284537.1 | GB EAY87310.1  hypothetical protein Osl_008543 [Oryza sativa (in...  | EAY87310.1     | 1,00E-08 | 63 | 30/47   |
| 299 | CV284539.1 | no blast match                                                       |                |          | 0  |         |
| 300 | CV284543.1 | REF XP_001012860.1  hypothetical protein THERM_00094060 [Tetra...    | XP_001012860.1 | 2,00E-27 | 57 | 52/90   |
| 301 | CV284548.1 | EMBL CAE67096.1  Hypothetical protein CBG12507 [Caenorhabditis br... | CAE67096.1     | 6,00E-17 | 40 | 52/128  |
| 302 | CV284552.1 | EMBL CAG04119.1  unnamed protein product [Tetraodon nigroviridis]    | CAG04119.1     | 2,00E-22 | 51 | 54/105  |
| 303 | CV284553.1 | GB EAT39816.1  glutathione peroxidase [Aedes aegypti] >gij108875...  | EAT39816.1     | 1,00E-09 | 44 | 30/67   |
| 304 | CV284555.1 | GB AAY19458.1  secreted protein [Ciona intestinalis]                 | AAY19458.1     | 6,00E-06 | 28 | 33/117  |
| 305 | CV284566.1 | no blast match                                                       |                |          | 0  |         |
| 306 | CV284569.1 | no blast match                                                       |                |          | 0  |         |
| 307 | CV284585.1 | SP P38984 RSSA_CHLVR 40S ribosomal protein SA (p40) (33 kDa lami...  | P38984         | 2,00E-70 | 86 | 116/134 |
| 308 | CV284597.1 | GB AAW26562.1  SJCHGC09076 protein [Schistosoma japonicum]           | AAW26562.1     | 2,00E-12 | 59 | 38/64   |
| 309 | CV284599.1 | REF NP_198938.1  ATGSTT3 (Arabidopsis thaliana Glutathione S-tra...  | NP_198938.1    | 7,00E-06 | 34 | 32/92   |
| 310 | CV284600.1 | no blast match                                                       |                |          | 0  |         |
| 311 | CV284607.1 | GB AAO65603.1  cathepsin L precursor [Hydra vulgaris]                | AAO65603.1     | 2,00E-28 | 77 | 57/74   |
| 312 | CV284633.1 | no blast match                                                       |                |          | 0  |         |
| 313 | CV284636.1 | no blast match                                                       |                |          | 0  |         |
| 314 | CV284638.1 | EMBL CAJ65510.3  HyTSR1 protein [Hydra vulgaris]                     | CAJ65510.3     | 3,00E-17 | 37 | 49/132  |
| 315 | CV284639.1 | no blast match                                                       |                |          | 0  |         |
| 316 | CV285050.1 | EMBL CAA08792.1  ribosomal protein L9 [Podocoryne carnea]            | CAA08792.1     | 1,00E-42 | 78 | 84/107  |
| 317 | CV285054.1 | REF XP_001176123.1  PREDICTED: similar to gelsolin [Strongylocen...  | XP_001176123.1 | 7,00E-37 | 74 | 77/103  |
| 318 | CV285057.1 | no blast match                                                       |                |          | 0  |         |
| 319 | CV285062.1 | no blast match                                                       |                |          | 0  |         |
| 320 | CV285064.1 | REF NP_001037524.1  ribosomal protein S10 [Bombyx mori] >gij5460...  | NP_001037524.1 | 2,00E-14 | 73 | 39/53   |
| 321 | CV285066.1 | REF NP_001080713.1  chaperonin containing TCP1, subunit 8 (theta...  | NP_001080713.1 | 6,00E-57 | 70 | 104/147 |
| 322 | CV285067.1 | no blast match                                                       |                |          | 0  |         |
| 323 | CV285070.1 | no blast match                                                       |                |          | 0  |         |
| 324 | CV285078.1 | GB AAX09934.1  ganglioside M2 activator-like protein [Aurelia au...  | AAX09934.1     | 3,00E-14 | 37 | 49/130  |
| 325 | CV285082.1 | REF XP_788935.2  PREDICTED: similar to Ribosomal protein L14, pa...  | XP_788935.2    | 3,00E-14 | 50 | 37/73   |
| 326 | CV285084.1 | GB AAL55470.1  ubiquitin/ribosomal protein S27a fusion protein [...] | AAL55470.1     | 6,00E-25 | 77 | 51/66   |
| 327 | CV285087.1 | no blast match                                                       |                |          | 0  |         |
| 328 | CV285089.1 | GB AAW27674.1  SJCHGC04249 protein [Schistosoma japonicum]           | AAW27674.1     | 2,00E-28 | 79 | 57/72   |
| 329 | CV285092.1 | no blast match                                                       |                |          | 0  |         |
| 330 | CV285094.1 | no blast match                                                       |                |          | 0  |         |
| 331 | CV285099.1 | no blast match                                                       |                |          | 0  |         |
| 332 | CV285106.1 | no blast match                                                       |                |          | 0  |         |
| 333 | CV285108.1 | EMBL CAN76945.1  hypothetical protein [Vitis vinifera]               | CAN76945.1     | 5,00E-21 | 34 | 46/134  |
| 334 | CV285111.1 | REF XP_001502076.1  PREDICTED: similar to SWI/SNF-related matrix...  | XP_001502076.1 | 5,00E-20 | 68 | 50/73   |
| 335 | CV285117.1 | GB ABF18291.1  multifunctional 14-3-3 family chaperone [Aedes ae...  | ABF18291.1     | 5,00E-17 | 70 | 44/62   |
| 336 | CV285119.1 | GB AAX48887.1  S11 [Suberites domuncula]                             | AAX48887.1     | 9,00E-21 | 90 | 48/53   |
| 337 | CV285126.1 | REF XP_001311347.1  hypothetical protein TVAG_264660 [Trichomona...  | XP_001311347.1 | 3,00E-09 | 33 | 40/118  |
| 338 | CV285128.1 | no blast match                                                       |                |          | 0  |         |
| 339 | CV285129.1 | no blast match                                                       |                |          | 0  |         |
| 340 | CV285131.1 | GB EAW70379.1  NADH dehydrogenase (ubiquinone) Fe-S protein 1, 7...  | EAW70379.1     | 7,00E-37 | 68 | 75/109  |
| 341 | CV285137.1 | GB EAU85127.1  hypothetical protein CC1G_08100 [Coprinopsis cine...  | EAU85127.1     | 3,00E-32 | 52 | 71/136  |
| 342 | CV285138.1 | REF XP_786540.2  PREDICTED: similar to astacin-like protein [Str...  | XP_786540.2    | 3,00E-07 | 31 | 35/110  |
| 343 | CV285146.1 | REF XP_001504089.1  PREDICTED: hypothetical protein [Equus caball... | XP_001504089.1 | 3,00E-06 | 65 | 19/29   |

|     |            |                                                                     |                |          |    |         |  |
|-----|------------|---------------------------------------------------------------------|----------------|----------|----|---------|--|
| 344 | CV285147.1 | no blast match                                                      |                |          |    | 0       |  |
| 345 | CV285148.1 | no blast match                                                      |                |          |    | 0       |  |
| 346 | CV285152.1 | REF NP_001077233.1  hypothetical protein LOC614055 [Bos taurus] ... | NP_001077233.1 | 1,00E-20 | 78 | 50/64   |  |
| 347 | CV285157.1 | GB EAU84784.1  hypothetical protein CC1G_00303 [Coprinopsis cine... | EAU84784.1     | 3,00E-11 | 54 | 32/59   |  |
| 348 | CV285163.1 | no blast match                                                      |                |          | 0  |         |  |
| 349 | CV285165.1 | no blast match                                                      |                |          | 0  |         |  |
| 350 | CV285173.1 | GB AAO65603.1  cathepsin L precursor [Hydra vulgaris]               | AAO65603.1     | 7,00E-19 | 85 | 46/54   |  |
| 351 | CV285177.1 | REF XP_001135046.1  PREDICTED: similar to RNA binding protein El... | XP_001135046.1 | 5,00E-22 | 41 | 68/162  |  |
| 352 | CV285179.1 | REF XP_417405.2  PREDICTED: similar to Rps21-prov protein [Gallu... | XP_417405.2    | 4,00E-19 | 54 | 45/83   |  |
| 353 | CV285182.1 | no blast match                                                      |                |          | 0  |         |  |
| 354 | CV285186.1 | no blast match                                                      |                |          | 0  |         |  |
| 355 | CV285187.1 | no blast match                                                      |                |          | 0  |         |  |
| 356 | CV285193.1 | no blast match                                                      |                |          | 0  |         |  |
| 357 | CV285197.1 | REF XP_001370789.1  PREDICTED: similar to KIAA0947 protein [Mono... | XP_001370789.1 | 3,00E-06 | 26 | 33/126  |  |
| 358 | CV285198.1 | no blast match                                                      |                |          | 0  |         |  |
| 359 | CV285199.1 | no blast match                                                      |                |          | 0  |         |  |
| 360 | CV285200.1 | no blast match                                                      |                |          | 0  |         |  |
| 361 | CV285202.1 | REF NP_868383.1  hypothetical protein-signal peptide and transme... | NP_868383.1    | 5,00E-15 | 48 | 38/79   |  |
| 362 | CV285213.1 | no blast match                                                      |                |          | 0  |         |  |
| 363 | CV285216.1 | no blast match                                                      |                |          | 0  |         |  |
| 364 | CV285222.1 | GB AAO15464.1 AF441167_1 60S ribosomal protein L15 [Spodoptera f... | AAO15464.1     | 1,00E-31 | 68 | 64/94   |  |
| 365 | CV285225.1 | GB ABG74924.1  calmodulin [Aegiceras corniculatum]                  | ABG74924.1     | 3,00E-29 | 42 | 60/142  |  |
| 366 | CV285229.1 | no blast match                                                      |                |          | 0  |         |  |
| 367 | CV285237.1 | no blast match                                                      |                |          | 0  |         |  |
| 368 | CV285239.1 | REF XP_001234246.1  PREDICTED: similar to GekBS036P [Gallus gallus] | XP_001234246.1 | 1,00E-15 | 53 | 41/76   |  |
| 369 | CV285240.1 | GB XP_001342200.1  PREDICTED: hypothetical protein [Danio rerio]    | XP_001342200.1 | 7,00E-06 | 32 | 29/88   |  |
| 370 | CV285242.1 | no blast match                                                      |                |          | 0  |         |  |
| 371 | CV285244.1 | GB ABK32077.1  ribosomal protein S21 [Branchiostoma belcheri]       | ABK32077.1     | 7,00E-14 | 71 | 38/53   |  |
| 372 | CV285249.1 | no blast match                                                      |                |          | 0  |         |  |
| 373 | CV285251.1 | no blast match                                                      |                |          | 0  |         |  |
| 374 | CV285253.1 | no blast match                                                      |                |          | 0  |         |  |
| 375 | CV285254.1 | EMB CAD27733.1  S6 ribosomal protein [Paracentrotus lividus]        | CAD27733.1     | 9,00E-11 | 62 | 34/54   |  |
| 376 | CV285255.1 | no blast match                                                      |                |          | 0  |         |  |
| 377 | CV285256.1 | REF NP_032329.1  heat shock protein 1 (chaperonin 10) [Mus muscu... | NP_032329.1    | 4,00E-20 | 67 | 52/77   |  |
| 378 | CV285257.1 | GB EDL19006.1  actin related protein 2/3 complex, subunit 1A, is... | EDL19006.1     | 9,00E-32 | 59 | 62/104  |  |
| 379 | CV285264.1 | no blast match                                                      |                |          | 0  |         |  |
| 380 | CV285266.1 | REF NP_001087319.1  MGC85413 protein [Xenopus laevis] >gij515931... | NP_001087319.1 | 1,00E-17 | 69 | 39/56   |  |
| 381 | CV285268.1 | REF NP_001034418.1  peroxiredoxin 6 [Gallus gallus] >gij82233783... | NP_001034418.1 | 3,00E-35 | 75 | 57/76   |  |
| 382 | CV285270.1 | EMB CAK04297.1  novel protein similar to mouse and human exosome... | CAK04297.1     | 1,00E-11 | 34 | 31/91   |  |
| 383 | CV285309.1 | GB AAO09929.1  glutathione peroxidase [Aurelia aurita]              | AAO09929.1     | 6,00E-31 | 70 | 58/82   |  |
| 384 | CV285313.1 | DBJ BAA85005.1  Hym-355 preprohormone [Hydra magnipapillata]        | BAA85005.1     | 1,00E-39 | 89 | 81/91   |  |
| 385 | CV285344.1 | REF XP_001340803.1  PREDICTED: similar to 19.9kD myosin light ch... | XP_001340803.1 | 7,00E-18 | 52 | 48/92   |  |
| 386 | CV285348.1 | no blast match                                                      |                |          | 0  |         |  |
| 387 | CV285354.1 | no blast match                                                      |                |          | 0  |         |  |
| 388 | CV285358.1 | no blast match                                                      |                |          | 0  |         |  |
| 389 | CV285370.1 | REF XP_001496243.1  PREDICTED: similar to lacrimal androgen-bind... | XP_001496243.1 | 3,00E-16 | 64 | 38/59   |  |
| 390 | CV285371.1 | PIR A53221 acidic ribosomal protein P1 - hydromedusa (Polyorchi...  |                | 3,00E-10 | 74 | 29/39   |  |
| 391 | CV285375.1 | no blast match                                                      |                |          | 0  |         |  |
| 392 | CV285378.1 | GB AAN73353.1  ribosomal protein L19 [Petromyzon marinus]           | AAN73353.1     | 6,00E-20 | 72 | 42/58   |  |
| 393 | CV285385.1 | no blast match                                                      |                |          | 0  |         |  |
| 394 | CV285401.1 | REF XP_970535.1  PREDICTED: similar to CG17636-PA.3 [Tribolium c... | XP_970535.1    | 1,00E-06 | 36 | 35/96   |  |
| 395 | CV285404.1 | no blast match                                                      |                |          | 0  |         |  |
| 396 | CV285411.1 | no blast match                                                      |                |          | 0  |         |  |
| 397 | CV285416.1 | REF XP_749492.1  40S ribosomal protein S21 [Aspergillus fumigatu... | XP_749492.1    | 3,00E-20 | 60 | 44/73   |  |
| 398 | CV285419.1 | GB ABG81375.1  actin [Metopus es]                                   | ABG81375.1     | 6,00E-28 | 86 | 64/74   |  |
| 399 | CV285420.1 | REF XP_422279.1  PREDICTED: hypothetical protein [Gallus gallus]    | XP_422279.1    | 4,00E-11 | 50 | 33/66   |  |
| 400 | CV285426.1 | no blast match                                                      |                |          | 0  |         |  |
| 401 | CV285435.1 | REF XP_308336.3  ENSANGP00000010951 [Anopheles gambiae str. PEST... | XP_308336.3    | 1,00E-36 | 83 | 71/85   |  |
| 402 | CV285442.1 | no blast match                                                      |                |          | 0  |         |  |
| 403 | CV285448.1 | no blast match                                                      |                |          | 0  |         |  |
| 404 | CV285449.1 | no blast match                                                      |                |          | 0  |         |  |
| 405 | CV285451.1 | no blast match                                                      |                |          | 0  |         |  |
| 406 | CV285458.1 | no blast match                                                      |                |          | 0  |         |  |
| 407 | CV285462.1 | GB ABI52727.1  Adp ribosylation factor 79F [Argas monolakensis]     | ABI52727.1     | 1,00E-27 | 87 | 56/64   |  |
| 408 | CV285463.1 | no blast match                                                      |                |          | 0  |         |  |
| 409 | CV285464.1 | no blast match                                                      |                |          | 0  |         |  |
| 410 | CV285466.1 | EMB CAE70384.1  Hypothetical protein CBG16945 [Caenorhabditis br... | CAE70384.1     | 2,00E-79 | 76 | 138/180 |  |
| 411 | CV285468.1 | REF XP_362626.2  predicted protein [Magnaporthe grisea 70-15] >g... | XP_362626.2    | 2,00E-09 | 36 | 47/128  |  |
| 412 | CV285472.1 | GB AAZ99726.1  dickkopf-like protein Dlp-2 precursor [Hydra magn... | AAZ99726.1     | 5,00E-27 | 75 | 53/70   |  |
| 413 | CV285485.1 | REF XP_001362150.1  PREDICTED: similar to HECT, UBA and WWE doma... | XP_001362150.1 | 6,00E-26 | 62 | 59/94   |  |
| 414 | CV285486.1 | GB ABC25033.1  ribosomal protein L35 [Hydra vulgaris]               | ABC25033.1     | 1,00E-48 | 96 | 99/103  |  |
| 415 | CV285492.1 | no blast match                                                      |                |          | 0  |         |  |
| 416 | CV285502.1 | no blast match                                                      |                |          | 0  |         |  |
| 417 | CV285507.1 | EMB CAF99476.1  unnamed protein product [Tetraodon nigroviridis]    | CAF99476.1     | 3,00E-15 | 42 | 43/101  |  |
| 418 | CV285521.1 | no blast match                                                      |                |          | 0  |         |  |
| 419 | CV285522.1 | DBJ BAB47390.1  mitochondrial ATP synthase gamma-subunit [Cyprin... | BAB47390.1     | 1,00E-13 | 58 | 36/62   |  |
| 420 | CV285523.1 | GB AAR39410.1  beta tubulin [Chlamys farreri]                       | AAR39410.1     | 3,00E-34 | 92 | 70/76   |  |
| 421 | CV285525.1 | GB ABM55583.1  putative 60S ribosomal protein L23 [Maconellicocc... | ABM55583.1     | 3,00E-19 | 95 | 45/47   |  |
| 422 | CV285528.1 | no blast match                                                      |                |          | 0  |         |  |
| 423 | CV285529.1 | no blast match                                                      |                |          | 0  |         |  |
| 424 | CV285537.1 | no blast match                                                      |                |          | 0  |         |  |
| 425 | CV285546.1 | GB AAX48838.1  L7a [Suberites domuncula]                            | AAX48838.1     | 2,00E-20 | 70 | 50/71   |  |
| 426 | CV285551.1 | no blast match                                                      |                |          | 0  |         |  |
| 427 | CV285581.1 | no blast match                                                      |                |          | 0  |         |  |
| 428 | CV285594.1 | REF XP_782614.2  PREDICTED: similar to Ribophorin I [Strongyloce... | XP_782614.2    | 4,00E-41 | 46 | 85/182  |  |
| 429 | CV285597.1 | GB AAQ96733.1  bzip transcription factor C/EBP [Podocoryne carnea]  | AAQ96733.1     | 3,00E-35 | 63 | 77/122  |  |
| 430 | CV285601.1 | no blast match                                                      |                |          | 0  |         |  |
| 431 | CV285621.1 | EMB CAN88468.1  novel protein similar to vertebrate eukaryotic t... | CAN88468.1     | 6,00E-44 | 71 | 93/130  |  |
| 432 | CV285628.1 | REF XP_001334181.1  PREDICTED: hypothetical protein [Danio rerio]   | XP_001334181.1 | 6,00E-36 | 43 | 77/176  |  |
| 433 | CV285629.1 | EMB CAG04053.1  unnamed protein product [Tetraodon nigroviridis]    | CAG04053.1     | 2,00E-17 | 28 | 63/221  |  |

Table S1  
KIEL 6 library

|     |            |                                                                     |                |          |    |        |  |
|-----|------------|---------------------------------------------------------------------|----------------|----------|----|--------|--|
| 434 | CV285632.1 | no blast match                                                      |                |          |    | 0      |  |
| 435 | CV285636.1 | no blast match                                                      |                |          |    | 0      |  |
| 436 | CV285637.1 | no blast match                                                      |                |          |    | 0      |  |
| 437 | CV285642.1 | REF XP_515260.2  PREDICTED: similar to peroxisomal integral memb... | XP_515260.2    | 8,00E-39 | 46 | 89/190 |  |
| 438 | CV285644.1 | REF XP_977138.2  hypothetical protein TTHERM_00037370 [Tetrahyme... | XP_977138.2    | 2,00E-09 | 46 | 28/60  |  |
| 439 | CV285653.1 | REF XP_791613.2  PREDICTED: similar to PH-4 protein, partial [St... | XP_791613.2    | 2,00E-31 | 46 | 65/140 |  |
| 440 | CV285654.1 | no blast match                                                      |                |          |    | 0      |  |
| 441 | CV285673.1 | no blast match                                                      |                |          |    | 0      |  |
| 442 | CV285684.1 | SP P41114 TPM1_PODCA Tropomyosin-1 >gil397472 emb CAA50550.1  Tr... | P41114         | 3,00E-28 | 53 | 73/136 |  |
| 443 | CV285701.1 | GB ABF21076.1  theromacin [Aplysia californica]                     | ABF21076.1     | 6,00E-12 | 50 | 29/57  |  |
| 444 | CV285707.1 | DBJ BAF63639.1  calreticulin [Crassostrea gigas]                    | BAF63639.1     | 2,00E-54 | 68 | 94/137 |  |
| 445 | CV285713.1 | REF XP_001120827.1  PREDICTED: similar to Karyopherin 3 CG1059-...  | XP_001120827.1 | 4,00E-28 | 55 | 54/97  |  |
| 446 | CV285714.1 | no blast match                                                      |                |          |    | 0      |  |
| 447 | CV285722.1 | REF XP_001177508.1  PREDICTED: similar to conserved hypothetical... | XP_001177508.1 | 5,00E-20 | 59 | 47/79  |  |
