# Supplementary material for: A Novel Gene Family Controls Species-Specific Morphological Traits in Hydra
Source: PubMed Central journal article supplement (PMC2586386; doi:10.1371/journal.pbio.0060278), 2008-11-18
Supplement: pbio.0060278.st004.pdf [file pbio.0060278.st004.pdf]

**Table S4:**

Tentacle regeneration experiments. Mean number of tentacles per polyp at 42, 66 and 130 hours after decapitation (mean±s.d.) in independent experiments (I, II, III, ...).

(1) Tentacle regeneration in transgenic *Hydra vulgaris* AEP A14 vs. *Hydra vulgaris* AEP wild-type (Fig. 5 c). Total number of animals: AEP<sup>A14</sup>, n=156; AEP<sup>WT</sup>, n=124.

|           | 42 hours           |                   | 66 hours           |                   | 130 hours          |                   |
|-----------|--------------------|-------------------|--------------------|-------------------|--------------------|-------------------|
|           | AEP <sup>A14</sup> | AEP <sup>WT</sup> | AEP <sup>A14</sup> | AEP <sup>WT</sup> | AEP <sup>A14</sup> | AEP <sup>WT</sup> |
| I)        | 2,36±1,67          | 1±1,25            | 3,64±1,69          | 2,46±1,2          | 6,08±1,47          | 5,81±0,94         |
| II)       | 5,44±1,58          | 2,23±1,6          | 7,39±1,55          | 4,82±1,71         | 8,61±1,39          | 6,38±1,07         |
| III)      | 4,8±1,27           | 1,9±0,86          | 5,77±1,33          | 3,77±1,63         | 6,78±1,05          | 5,97±1,12         |
| mean±s.d. | 4,20±1,5           | 1,71±1,24         | 5,60±1,52          | 3,68±1,51         | 7,16±1,3           | 6,05±1,04         |

(2) Tentacle regeneration in transgenic *Hydra vulgaris* AEP A14 vs. *Hydra vulgaris* AEP Ecto-1 transgenic line (Fig. 5 c). Total number of animals: AEP<sup>A14</sup>, n=106; Ecto-1, n=102

|           | 42 hours           |          | 66 hours           |          | 130 hours          |          |
|-----------|--------------------|----------|--------------------|----------|--------------------|----------|
|           | AEP <sup>A14</sup> | Ecto-1   | AEP <sup>A14</sup> | Ecto-1   | AEP <sup>A14</sup> | Ecto-1   |
| I)        | 3,8±1,0            | 1,2±1,17 | 5,9±0,85           | 2,3±1,65 | 6,9±0,93           | 5,7±0,95 |
| II)       | 3,0±0,95           | 1,5±1,68 | 5,5±1,06           | 2,9±1,73 | 7,9±1,55           | 5,0±0,49 |
| III)      | 3,4±1,86           | 1,4±1,58 | 5,5±1,48           | 3,1±1,68 | 7,1±1,66           | 5,9±1,42 |
| IV)       | 4,2±1,77           | 2,2±1,79 | 6,1±1,78           | 3,4±1,43 | 7,1±2,03           | 5,9±1,62 |
| mean±s.d. | 3,6±1,61           | 1,6±1,64 | 5,8±1,44           | 3,0±1,64 | 7,2±1,70           | 5,7±1,31 |

(3) Tentacle regeneration in *H. oligactis* polyps electroporated with *oHYM301A* dsRNA vs. polyps electroporated with *GFP* dsRNA (Fig. 7 e). Total number of animals: *oHYM301A* dsRNA, n=49; *GFP* dsRNA, n=55.

|           | 42 hours        |            | 66 hours        |            | 130 hours       |            |
|-----------|-----------------|------------|-----------------|------------|-----------------|------------|
|           | <i>oHYM301A</i> | <i>GFP</i> | <i>oHYM301A</i> | <i>GFP</i> | <i>oHYM301A</i> | <i>GFP</i> |
| I)        | 2,5±1,51        | 3,9±1,06   | 3,0±1,58        | 4,3±1,0    | 3,2±1,57        | 4,3±1,0    |
| II)       | 2,4±1,85        | 4,0±1,3    | 3,1±1,92        | 4,3±1,03   | 4,0±1,37        | 4,5±1,23   |
| III)      | 2,7±1,91        | 3,8±1,21   | 3,6±1,79        | 5,1±1,22   | 4,2±1,52        | 5,2±1,21   |
| mean±s.d. | 2,6±1,76        | 3,9±1,18   | 3,2±1,77        | 4,5±1,14   | 3,9±1,51        | 4,6±1,21   |
