# Supplementary material for: A Novel Gene Family Controls Species-Specific Morphological Traits in Hydra
Source: PubMed Central journal article supplement (PMC2586386; doi:10.1371/journal.pbio.0060278), 2008-11-18
Supplement: pbio.0060278.st005.pdf [file pbio.0060278.st005.pdf]

**Table S5: Primers used in this study**

| <b>Primer name</b> | <b>Sequence (5' to 3')</b>                                        |
|--------------------|-------------------------------------------------------------------|
| GAPDH_F            | GCC TTA TGA CAA CCA TTC AT                                        |
| GAPDH_R            | TCA ACA ACA GAA ACA TCT GC                                        |
| ACTIN35            | CCA AAA TAG ATC CTC CGA TCC                                       |
| ACTIN34            | AAG CTC TTC CCT CGA GAA ATC                                       |
| Hym301_F(2)Pst     | GTC ACT GCA GCC CCT AAA ATG ACA CGT GTT TGC G                     |
| Hym301_R(295)Pst   | GGG GCTGCA GCA TTT TTT TGC GTA ATT TCT TTT TTA CC                 |
| oHYM301A_F(40)     | GAA TTT GTA TAT TAT TAC TTT GTG TAG                               |
| oHYM301A_R(144)    | CAC TTT GAA CGA ATG AAG GGT C                                     |
| AEP301A_F          | GAC TGC TCT ATC GAG AGA TTC                                       |
| AEP301A_R          | TAG ATG GAG GAA TTT CAA GAG AG                                    |
| gmHYMA_E1F         | CAC ATA CCC TAA AAT GAC ACG TG                                    |
| gmHYMA_E3R         | CCA TTT TTT AAA CTA TTG ATC ACA TGT TC                            |
| Alx_F(422)         | CCC CTA GTA ACT CAA TAT GTA G                                     |
| Alx_R(631)         | GTA CAA GCA AGA TCT TGC AGT G                                     |
| oHYM301_F(32)      | CTT TGC ATT GAT TGA TGC GCA ACC                                   |
| o301Ai_T7_F        | CAT TAA TAC GAC TCA CTA TAG GGG ATC GTA AAA CAA TAT<br>TTA CTT C  |
| o301Ai_T7_R        | TAC TAA TAC GAC TCA CTA TAG GGA CAT TGT TTA AAC ATA<br>TTA TCA TC |
| T7_GFP_F           | TAA TAC GAC TCA CTA TAG GGA CAG TGG AGA GGG TGA AGG<br>TGA TGC    |
| T7_GFP_R           | TAA TAC GAC TCA CTA TAG GGA GGC AGA TTG TGT GGA CAG<br>GTA ATG G  |
