# Supplementary material for: A Novel Gene Family Controls Species-Specific Morphological Traits in Hydra
Source: PLoS Biol. 2008 Nov 18;6(11):e278. doi: 10.1371/journal.pbio.0060278 (PMC2586386; doi:10.1371/journal.pbio.0060278)
Supplement: Table S2 — General information about clusters and singletons of H. magnipapillata-specific cDNA library (Kiel 7). Results of the BLASTX search against the nonredundant NCBI database. Sequences with E value ≥ 1e–5 were referred to as having no significant similarity to the proteins in NCBI database (potential TRGs). The clusters were numbered according to the amount of ESTs comprising them, with cluster 01 (CL01CONTIG1) being the largest. The consensus cluster sequences and singleton sequences are stored as a multi-sequence file (FASTA format) at the COMPAGEN server (http://compagen.zoologie.uni-kiel.de/retrieve.htm). (80 KB PDF) [file pbio.0060278.st002.pdf]

**Table S2****KIEL 7 (*Hydra magnipapillata* specific) SSH library. Results of BLASTX search against non-redundant NCBI database**General information about clusters and singletons of *H. magnipapillata*-specific cDNA library (Kiel 7).Results of the BLASTX search against non-redundant NCBI database. Sequences with E value  $\geq 1e-5$  were referred to as having no significant homology to the proteins in NCBI database (potential taxon restricted genes, TGRs).

The clusters were numbered according to the amount of ESTs comprising them, with cluster 01 (CL01CONTIG1) being the largest.

The consensus cluster sequences and singleton sequences are stored as multi-sequence file (FASTA format) at the COMPAGEN server (<http://compagen.zoologie.uni-kiel.de/retrieve.htm>).**Pct Idnt**, % identity between *H. magnipapillata* amino acid sequence and the best BLASTX match from NCBI**Length (bp)**, length of consensus cluster sequence or singleton in base pares

| N  | Name        | Best blast match (with E-value < 1e-5)                              | Accession number | Expect   | Pct Idnt | Ratio Idnt | Length (bp) |
|----|-------------|---------------------------------------------------------------------|------------------|----------|----------|------------|-------------|
| 1  | CL1CONTIG1  | DBJ BAB33421.1  putative senescence-associated protein [Pisum sa... | BAB33421.1       | 2,00E-09 | 75       | 31/41      | 299         |
| 2  | CL2CONTIG1  | GB ABC25029.1  ferritin [Hydra vulgaris]                            | ABC25029.1       | 3,00E-45 | 96       | 87/90      | 347         |
| 3  | CL2CONTIG2  | GB ABC25029.1  ferritin [Hydra vulgaris]                            | ABC25029.1       | 8,00E-25 | 91       | 53/58      | 233         |
| 4  | CL3CONTIG1  | no blast match                                                      |                  |          | 0        |            | 581         |
| 5  | CL3CONTIG2  | no blast match                                                      |                  |          | 0        |            | 397         |
| 6  | CL4CONTIG1  | GB ABC25029.1  ferritin [Hydra vulgaris]                            | ABC25029.1       | 4,00E-38 | 100      | 80/80      | 348         |
| 7  | CL5CONTIG1  | REF XP_001120521.1  PREDICTED: similar to Ribosomal protein L40 ... | XP_001120521.1   | 3,00E-65 | 95       | 122/128    | 628         |
| 8  | CL6CONTIG1  | EMB CAA08792.1  ribosomal protein L9 [Podocoryne carnea]            | CAA08792.1       | 9,00E-30 | 79       | 62/78      | 240         |
| 9  | CL7CONTIG1  | no blast match                                                      |                  |          | 0        |            | 278         |
| 10 | CL8CONTIG1  | GB ABC25036.1  ribosomal protein S9 [Hydra vulgaris]                | ABC25036.1       | 5,00E-33 | 98       | 72/73      | 222         |
| 11 | CL9CONTIG1  | GB ABR27976.1  ribosomal protein L11 [Tritoma infestans]            | ABR27976.1       | 3,00E-79 | 79       | 140/176    | 575         |
| 12 | CL10CONTIG1 | EMB CAD91420.1  ribosomal protein S3a [Crassostrea gigas]           | CAD91420.1       | 1,00E-77 | 69       | 139/199    | 627         |
| 13 | CL11CONTIG1 | GB AAN05584.1  ribosomal protein L30 [Argopecten irradians]         | AAN05584.1       | 1,00E-30 | 81       | 67/82      | 279         |
| 14 | CL12CONTIG1 | no blast match                                                      |                  |          | 0        |            | 139         |
| 15 | CL13CONTIG1 | GB EAT34547.1  60S ribosomal protein L10a [Aedes aegypti] >gil10... | EAT34547.1       | 2,00E-48 | 78       | 94/119     | 357         |
| 16 | CL14CONTIG1 | REF XP_788935.2  PREDICTED: similar to Ribosomal protein L14, pa... | XP_788935.2      | 7,00E-13 | 49       | 35/71      | 283         |
| 17 | CL15CONTIG1 | GB AAN52376.1  ribosomal protein L23a [Branchiostoma belcheri]      | AAN52376.1       | 1,00E-37 | 83       | 77/92      | 280         |
| 18 | CL16CONTIG1 | EMB CAN70636.1  hypothetical protein [Vitis vinifera]               | CAN70636.1       | 3,00E-33 | 67       | 69/102     | 432         |
| 19 | CL17CONTIG1 | no blast match                                                      |                  |          | 0        |            | 466         |
| 20 | CL18CONTIG1 | no blast match                                                      |                  |          | 0        |            | 315         |
| 21 | CL19CONTIG1 | EMB CAJ57448.1  astacin 2 [Hydractinia echinata]                    | CAJ57448.1       | 1,00E-07 | 46       | 29/63      | 203         |
| 22 | CL20CONTIG1 | no blast match                                                      |                  |          | 0        |            | 406         |
| 23 | CL21CONTIG1 | GB ABC25033.1  ribosomal protein L35 [Hydra vulgaris]               | ABC25033.1       | 3,00E-26 | 98       | 63/64      | 279         |
| 24 | CL22CONTIG1 | GB AAZ99726.1  dickkopf-like protein Dlp-2 precursor [Hydra magn... | AAZ99726.1       | 3,00E-36 | 100      | 71/71      | 215         |
| 25 | CL23CONTIG1 | SP P38984 RSSA_CHLVR 40S ribosomal protein SA (p40) (33 kDa lami... | P38984           | 2,00E-41 | 85       | 76/89      | 268         |
| 26 | CL24CONTIG1 | EMB CAH92706.1  hypothetical protein [Pongo pygmaeus]               | CAH92706.1       | 8,00E-07 | 44       | 29/65      | 327         |
| 27 | CL25CONTIG1 | GB ABC25029.1  ferritin [Hydra vulgaris]                            | ABC25029.1       | 8,00E-17 | 86       | 40/46      | 337         |
| 28 | CL26CONTIG1 | GB ABC25036.1  ribosomal protein S9 [Hydra vulgaris]                | ABC25036.1       | 1,00E-11 | 100      | 32/32      | 178         |
| 29 | CL27CONTIG1 | no blast match                                                      |                  |          | 0        |            | 343         |
| 30 | CL28CONTIG1 | SP P40122 CAP_CHLVR Adenyl cyclase-associated protein (CAP) >g...   | P40122           | 1,00E-15 | 79       | 46/58      | 214         |
| 31 | CL29CONTIG1 | no blast match                                                      |                  |          | 0        |            | 149         |
| 32 | CL30CONTIG1 | REF XP_570211.1  WD-repeat protein [Cryptococcus neoformans var.... | XP_570211.1      | 3,00E-10 | 44       | 30/68      | 413         |
| 33 | CL31CONTIG1 | no blast match                                                      |                  |          | 0        |            | 262         |
| 34 | CL32CONTIG1 | SP Q94587 TCTP_HYDAT Translationally-controlled tumor protein ho... | Q94587           | 3,00E-27 | 98       | 59/60      | 314         |
| 35 | CL32CONTIG2 | SP Q94587 TCTP_HYDAT Translationally-controlled tumor protein ho... | Q94587           | 5,00E-10 | 93       | 28/30      | 125         |
| 36 | CL33CONTIG1 | DBJ BAA82365.1  chymotrypsinogen 1 [Paralichthys olivaceus]         | BAA82365.1       | 5,00E-12 | 50       | 35/70      | 433         |
| 37 | CL34CONTIG1 | no blast match                                                      |                  |          | 0        |            | 140         |
| 38 | CL35CONTIG1 | GB AAI22477.1  LOC734151 protein [Xenopus laevis]                   | AAI22477.1       | 1,00E-13 | 37       | 45/119     | 453         |
| 39 | CL36CONTIG1 | REF ZP_01774245.1  conserved hypothetical protein [Geobacter bem... | ZP_01774245.1    | 1,00E-12 | 33       | 76/228     | 1098        |
| 40 | CL37CONTIG1 | no blast match                                                      |                  |          | 0        |            | 110         |
| 41 | CL37CONTIG2 | no blast match                                                      |                  |          | 0        |            | 203         |
| 42 | CL38CONTIG1 | no blast match                                                      |                  |          | 0        |            | 812         |
| 43 | CL39CONTIG1 | REF XP_687566.1  PREDICTED: similar to LOC494737 protein [Danio ... | XP_687566.1      | 5,00E-30 | 43       | 67/153     | 538         |
| 44 | CL40CONTIG1 | no blast match                                                      |                  |          | 0        |            | 208         |
| 45 | CL41CONTIG1 | REF NP_001085512.1  MGC80283 protein [Xenopus laevis] >gil821845... | NP_001085512.1   | 3,00E-22 | 40       | 50/124     | 371         |
| 46 | CL42CONTIG1 | EMB CAJ33888.1  putative serine protease inhibitor [Hydra vulgaris] | CAJ33888.1       | 4,00E-28 | 93       | 58/62      | 209         |
| 47 | CL43CONTIG1 | EMB CAA33804.1  unnamed protein product [Drosophila melanogaster]   | CAA33804.1       | 6,00E-28 | 76       | 60/78      | 237         |
| 48 | CL44CONTIG1 | no blast match                                                      |                  |          | 0        |            | 500         |
| 49 | CL45CONTIG1 | REF NP_001082099.1  beta-amyloid precursor protein A [Xenopus la... | NP_001082099.1   | 7,00E-06 | 43       | 22/51      | 403         |
| 50 | CL46CONTIG1 | GB AAL62469.1  ribosomal protein L7 [Spodoptera frugiperda]         | AAL62469.1       | 2,00E-36 | 77       | 49/63      | 337         |
| 51 | CL47CONTIG1 | GB AAI18129.1  MGC127900 protein [Bos taurus]                       | AAI18129.1       | 2,00E-15 | 62       | 42/67      | 207         |
| 52 | CL48CONTIG1 | SP P51554 EF1A_HYDAT Elongation factor 1-alpha (EF-1-alpha) >gil... | P51554           | 6,00E-23 | 100      | 51/51      | 157         |
| 53 | CL49CONTIG1 | REF NP_001078074.1  ATPDIL2-1/MEE30/UNE5 (PDI-LIKE 2-1, maternal... | NP_001078074.1   | 6,00E-29 | 64       | 57/88      | 362         |
| 54 | CL50CONTIG1 | REF NP_001073505.1  hypothetical protein LOC568021 [Danio rerio]... | NP_001073505.1   | 6,00E-09 | 33       | 44/130     | 369         |
| 55 | CL51CONTIG1 | GB AAK68766.1  glycine-rich RNA binding protein [Arabidopsis tha... | AAK68766.1       | 1,00E-08 | 65       | 32/49      | 252         |
| 56 | CL52CONTIG1 | REF XP_001176123.1  PREDICTED: similar to gelsolin [Strongylocen... | XP_001176123.1   | 3,00E-40 | 83       | 78/93      | 299         |
| 57 | CL53CONTIG1 | REF NP_001087877.1  MGC82038 protein [Xenopus laevis] >gil519500... | NP_001087877.1   | 3,00E-22 | 37       | 49/132     | 417         |
| 58 | CL54CONTIG1 | no blast match                                                      |                  |          | 0        |            | 384         |
| 59 | CL55CONTIG1 | no blast match                                                      |                  |          | 0        |            | 179         |
| 60 | CL56CONTIG1 | no blast match                                                      |                  |          | 0        |            | 308         |
| 61 | CL57CONTIG1 | GB AAF24991.1  astacin family metalloendopeptidase FARM-1 [Hydra... | AAF24991.1       | 8,00E-54 | 68       | 102/149    | 443         |
| 62 | CL58CONTIG1 | REF NP_001016537.1  aldehyde dehydrogenase 3 family, member A2 [... | NP_001016537.1   | 2,00E-26 | 58       | 54/92      | 277         |
| 63 | CL59CONTIG1 | no blast match                                                      |                  |          | 0        |            | 283         |
| 64 | CL60CONTIG1 | REF XP_694322.2  PREDICTED: similar to Znf622 protein [Danio rerio] | XP_694322.2      | 4,00E-30 | 46       | 69/148     | 447         |
| 65 | CL61CONTIG1 | REF XP_001518513.1  PREDICTED: similar to LRRG00134, partial [Or... | XP_001518513.1   | 4,00E-10 | 38       | 32/84      | 387         |
| 66 | CL62CONTIG1 | GB ABC25040.1  probable RNA-dependent helicase p72 [Hydra vulgaris] | ABC25040.1       | 1,00E-53 | 77       | 104/135    | 442         |
| 67 | CL63CONTIG1 | EMB CAI11750.1  novel protein (zgc:64104) [Danio rerio] >gil5620... | CAI11750.1       | 1,00E-15 | 36       | 57/157     | 430         |
| 68 | CL64CONTIG1 | GB AAW25262.1  unknown [Schistosoma japonicum]                      | AAW25262.1       | 1,00E-15 | 33       | 41/124     | 713         |
| 69 | CL65CONTIG1 | REF XP_316305.3  ENSANGP00000005976 [Anopheles gambiae str. PEST... | XP_316305.3      | 1,00E-07 | 29       | 49/167     | 428         |
| 70 | CL66CONTIG1 | REF XP_967635.1  PREDICTED: similar to CG3395-PA, isoform A isof... | XP_967635.1      | 8,00E-33 | 85       | 69/81      | 259         |
| 71 | CL67CONTIG1 | REF ZP_01774245.1  conserved hypothetical protein [Geobacter bem... | ZP_01774245.1    | 3,00E-07 | 54       | 27/50      | 214         |
| 72 | CL68CONTIG1 | no blast match                                                      |                  |          | 0        |            | 109         |

|     |              |                                                                     |                |          |     |         |     |
|-----|--------------|---------------------------------------------------------------------|----------------|----------|-----|---------|-----|
| 73  | CL69CONTIG1  | REF XP_973667.1  PREDICTED: similar to CG1507-PA, isoform A [Tri... | XP_973667.1    | 7,00E-48 | 46  | 97/210  | 707 |
| 74  | CL70CONTIG1  | no blast match                                                      |                |          | 0   |         | 115 |
| 75  | CL71CONTIG1  | REF NP_956951.1  thymocyte nuclear protein 1 [Danio rerio] >gi 8... | NP_956951.1    | 8,00E-20 | 56  | 49/86   | 294 |
| 76  | CL72CONTIG1  | GB AAN87350.1  14-3-3 protein B [Hydra vulgaris]                    | AAN87350.1     | 2,00E-61 | 100 | 121/121 | 375 |
| 77  | CL73CONTIG1  | REF XP_001369327.1  PREDICTED: similar to polyA binding protein ... | XP_001369327.1 | 8,00E-34 | 75  | 67/89   | 294 |
| 78  | CL74CONTIG1  | GB AAQ96733.1  bzip transcription factor C/EBP [Podocoryne carnea]  | AAQ96733.1     | 2,00E-36 | 66  | 86/129  | 361 |
| 79  | CL75CONTIG1  | GB AAX48887.1  S11 [Suberites domuncula]                            | AAX48887.1     | 4,00E-22 | 79  | 53/67   | 202 |
| 80  | CL76CONTIG1  | GB AAR31143.1  zebra precursor; HyZebra [Hydra magnipapillata]      | AAR31143.1     | 9,00E-19 | 45  | 44/97   | 305 |
| 81  | CL77CONTIG1  | no blast match                                                      |                |          | 0   |         | 356 |
| 82  | CL78CONTIG1  | GB AAQ96653.1  glutamate-cysteine ligase modifier subunit [Branc... | AAQ96653.1     | 2,00E-16 | 47  | 42/88   | 325 |
| 83  | CL79CONTIG1  | SP Q9BMX5 RS6_APLCA 40S ribosomal protein S6 >gi 12620237 gb AAG... | Q9BMX5         | 1,00E-15 | 71  | 38/53   | 206 |
| 84  | CL80CONTIG1  | no blast match                                                      |                |          | 0   |         | 416 |
| 85  | CL81CONTIG1  | EMB CAG08835.1  unnamed protein product [Tetraodon nigroviridis]    | CAG08835.1     | 2,00E-13 | 67  | 31/46   | 210 |
| 86  | CL82CONTIG1  | GB AAH53776.1  MGC64312 protein [Xenopus laevis]                    | AAH53776.1     | 1,00E-19 | 78  | 44/56   | 236 |
| 87  | CL83CONTIG1  | REF XP_781288.1  PREDICTED: similar to ATPase, H+ transporting, ... | XP_781288.1    | 6,00E-36 | 72  | 73/101  | 356 |
| 88  | CL84CONTIG1  | REF NP_001080153.1  actin related protein 2/3 complex, subunit 1... | NP_001080153.1 | 8,00E-70 | 64  | 127/198 | 636 |
| 89  | CL85CONTIG1  | REF XP_783224.1  PREDICTED: similar to NADH dehydrogenase (ubiqu... | XP_783224.1    | 2,00E-39 | 66  | 75/113  | 368 |
| 90  | CL86CONTIG1  | DBJ BAF45464.1  ribosomal protein S2 [Solea senegalensis] >gi 12... | BAF45464.1     | 5,00E-22 | 80  | 58/72   | 241 |
| 91  | CL87CONTIG1  | DBJ BAC92690.1  epitheliopptide HYM-301 [Hydra magnipapillata]      | BAC92690.1     | 1,00E-10 | 46  | 41/88   | 440 |
| 92  | CL88CONTIG1  | REF NP_573139.1  CG9742-PA [Drosophila melanogaster] >gi 2942806... | NP_573139.1    | 2,00E-14 | 78  | 37/47   | 206 |
| 93  | CL89CONTIG1  | REF XP_414685.1  PREDICTED: similar to betaine homocysteine meth... | XP_414685.1    | 9,00E-19 | 68  | 41/60   | 184 |
| 94  | CL90CONTIG1  | REF XP_001509678.1  PREDICTED: similar to SWI/SNF related, matri... | XP_001509678.1 | 5,00E-49 | 80  | 89/111  | 337 |
| 95  | CL91CONTIG1  | REF XP_966334.1  PREDICTED: similar to CG3612-PA isoform 1 [Trib... | XP_966334.1    | 8,00E-75 | 97  | 138/141 | 486 |
| 96  | CL92CONTIG1  | DBJ BAA34704.1  cathepsin L-like tick cysteine proteinase B [Hae... | BAA34704.1     | 1,00E-15 | 83  | 36/43   | 456 |
| 97  | CL93CONTIG1  | GB EDL46410.1  hypothetical protein, conserved [Plasmodium vivax]   | EDL46410.1     | 8,00E-09 | 37  | 44/117  | 365 |
| 98  | CL94CONTIG1  | GB AAX48841.1  L10e/P0 [Suberites domuncula]                        | AAX48841.1     | 7,00E-40 | 72  | 82/113  | 340 |
| 99  | CL95CONTIG1  | GB AAW26530.1  SJCHGC02843 protein [Schistosoma japonicum]          | AAW26530.1     | 1,00E-14 | 45  | 45/98   | 416 |
| 100 | CL96CONTIG1  | no blast match                                                      |                |          | 0   |         | 521 |
| 101 | CL97CONTIG1  | SP Q4PM47 RS29_IXOSC 40S ribosomal protein S29 >gi 67083965 gb A... | Q4PM47         | 2,00E-20 | 75  | 41/54   | 321 |
| 102 | CL98CONTIG1  | GB ABR23475.1  60s ribosomal protein L34 [Ornithodoros parkeri]     | ABR23475.1     | 2,00E-37 | 72  | 73/101  | 330 |
| 103 | CL99CONTIG1  | DBJ BAB16293.1  glyceraldehyde-3-phosphate dehydrogenase [Anguil... | BAB16293.1     | 2,00E-65 | 82  | 122/148 | 448 |
| 104 | CL100CONTIG1 | REF XP_866081.1  PREDICTED: similar to Ornithine aminotransferas... | XP_866081.1    | 9,00E-14 | 65  | 36/55   | 315 |
| 105 | CL101CONTIG1 | no blast match                                                      |                |          | 0   |         | 487 |
| 106 | CL102CONTIG1 | REF XP_001204254.1  PREDICTED: similar to nuclear matrix protein... | XP_001204254.1 | 3,00E-53 | 70  | 96/136  | 431 |
| 107 | CL103CONTIG1 | no blast match                                                      |                |          | 0   |         | 457 |
| 108 | CL104CONTIG1 | no blast match                                                      |                |          | 0   |         | 289 |
| 109 | CL105CONTIG1 | REF NP_001080633.1  lysyl-tRNA synthetase [Xenopus laevis] >gi 2... | NP_001080633.1 | 1,00E-26 | 74  | 46/62   | 237 |
| 110 | CL106CONTIG1 | no blast match                                                      |                |          | 0   |         | 298 |
| 111 | CL107CONTIG1 | EMB CAJ01880.1  ubiquitin/ribosomal protein S27Ae fusion protein... | CAJ01880.1     | 6,00E-41 | 96  | 84/87   | 300 |
| 112 | CL108CONTIG1 | no blast match                                                      |                |          | 0   |         | 156 |
| 113 | CL109CONTIG1 | no blast match                                                      |                |          | 0   |         | 296 |
| 114 | CL110CONTIG1 | no blast match                                                      |                |          | 0   |         | 140 |
| 115 | CL111CONTIG1 | no blast match                                                      |                |          | 0   |         | 144 |
| 116 | CL112CONTIG1 | REF NP_001005020.1  MGC79754 protein [Xenopus tropicalis] >gi 49... | NP_001005020.1 | 3,00E-31 | 73  | 61/83   | 274 |
| 117 | CL113CONTIG1 | no blast match                                                      |                |          | 0   |         | 260 |
| 118 | CL114CONTIG1 | no blast match                                                      |                |          | 0   |         | 297 |
| 119 | CL115CONTIG1 | REF NP_001085559.1  MGC80429 protein [Xenopus laevis] >gi 491191... | NP_001085559.1 | 3,00E-13 | 41  | 40/96   | 300 |
| 120 | CL116CONTIG1 | no blast match                                                      |                |          | 0   |         | 279 |
| 121 | CL117CONTIG1 | DBJ BAB13535.1  hym-323 [Hydra magnipapillata]                      | BAB13535.1     | 2,00E-27 | 93  | 58/62   | 297 |
| 122 | CL118CONTIG1 | no blast match                                                      |                |          | 0   |         | 283 |
| 123 | CL119CONTIG1 | DBJ BAF37942.1  Similar to ribosomal protein S23 [Oncorhynchus m... | BAF37942.1     | 7,00E-19 | 86  | 43/50   | 179 |
| 124 | CL120CONTIG1 | GB ABN09816.1  Glycoside hydrolase, family 17; X8 [Medicago trun... | ABN09816.1     | 2,00E-12 | 38  | 37/97   | 282 |
| 125 | CL121CONTIG1 | no blast match                                                      |                |          | 0   |         | 135 |
| 126 | CL122CONTIG1 | REF XP_624951.2  PREDICTED: similar to eIF-5A CG3186-PA, isoform... | XP_624951.2    | 2,00E-39 | 78  | 75/95   | 289 |
| 127 | CL123CONTIG1 | GB ABC25042.1  chitinase [Hydra vulgaris]                           | ABC25042.1     | 1,00E-11 | 100 | 28/28   | 110 |
| 128 | CL124CONTIG1 | no blast match                                                      |                |          | 0   |         | 399 |
| 129 | CL125CONTIG1 | SP Q25189 GBLP_HYDAT Guanine nucleotide-binding protein subunit ... | Q25189         | 2,00E-14 | 100 | 38/38   | 149 |
| 130 | CL127CONTIG1 | no blast match                                                      |                |          | 0   |         | 107 |
| 131 | CL128CONTIG1 | no blast match                                                      |                |          | 0   |         | 294 |
| 132 | CL129CONTIG1 | EMB CAA08792.1  ribosomal protein L9 [Podocoryne carnea]            | CAA08792.1     | 5,00E-16 | 81  | 39/48   | 147 |
| 133 | CL130CONTIG1 | no blast match                                                      |                |          | 0   |         | 313 |
| 134 | CL131CONTIG1 | no blast match                                                      |                |          | 0   |         | 297 |
| 135 | CL132CONTIG1 | no blast match                                                      |                |          | 0   |         | 296 |
| 136 | CL133CONTIG1 | REF XP_001177412.1  PREDICTED: similar to interferon, gamma-indu... | XP_001177412.1 | 3,00E-20 | 48  | 46/94   | 289 |
| 137 | CL134CONTIG1 | no blast match                                                      |                |          | 0   |         | 123 |
| 138 | CL135CONTIG1 | no blast match                                                      |                |          | 0   |         | 236 |
| 139 | CL136CONTIG1 | no blast match                                                      |                |          | 0   |         | 124 |
| 140 | CL137CONTIG1 | EMB CAA04046.1  actin [Helobdella triserialis]                      | CAA04046.1     | 8,00E-28 | 96  | 61/63   | 192 |
| 141 | CL138CONTIG1 | PDB 1SP7 A Chain A, Structure Of The Cys-Rich C-Terminal Domain ... | 1SP7           | 1,00E-06 | 78  | 18/23   | 193 |
| 142 | CL139CONTIG1 | no blast match                                                      |                |          | 0   |         | 165 |
| 143 | CL140CONTIG1 | no blast match                                                      |                |          | 0   |         | 191 |
| 144 | CL141CONTIG1 | no blast match                                                      |                |          | 0   |         | 183 |
| 145 | CL142CONTIG1 | GB ABM55461.1  ribosomal protein L19 [Xenopsylla cheopis]           | ABM55461.1     | 6,00E-22 | 72  | 47/65   | 442 |
| 146 | CL143CONTIG1 | no blast match                                                      |                |          | 0   |         | 428 |
| 147 | CL144CONTIG1 | REF XP_001022964.1  TPR Domain containing protein [Tetrahymena t... | XP_001022964.1 | 6,00E-23 | 28  | 60/213  | 756 |
| 148 | CL145CONTIG1 | SP P17126 ACT_HYDAT Actin, non-muscle 6.2 >gi 159254 gb AAA29205... | P17126         | 1,00E-35 | 100 | 75/75   | 228 |
| 149 | CL146CONTIG1 | no blast match                                                      |                |          | 0   |         | 195 |
| 150 | CL147CONTIG1 | GB AAO60428.1  chordin-like protein [Hydra magnipapillata]          | AAO60428.1     | 7,00E-37 | 100 | 69/69   | 211 |
| 151 | CL148CONTIG1 | REF XP_761629.1  hypothetical protein UM05482.1 [Ustilago maydis... | XP_761629.1    | 3,00E-20 | 70  | 50/71   | 214 |
| 152 | CL149CONTIG1 | no blast match                                                      |                |          | 0   |         | 215 |
| 153 | CL150CONTIG1 | GB AAG30574.1 AF312857_1 latrophilin-related protein [Hydra vulg... | AAG30574.1     | 4,00E-06 | 59  | 22/37   | 188 |
| 154 | CL151CONTIG1 | REF XP_001342834.1  PREDICTED: similar to 60S ribosomal protein ... | XP_001342834.1 | 3,00E-11 | 79  | 35/44   | 147 |
| 155 | CL152CONTIG1 | REF NP_001011190.1  hypothetical protein LOC496612 [Xenopus trop... | NP_001011190.1 | 1,00E-10 | 45  | 37/82   | 207 |
| 156 | CL153CONTIG1 | REF XP_001497791.1  PREDICTED: similar to ubiquitin conjugating ... | XP_001497791.1 | 2,00E-38 | 79  | 71/89   | 339 |
| 157 | CL154CONTIG1 | no blast match                                                      |                |          | 0   |         | 265 |
| 158 | CL155CONTIG1 | no blast match                                                      |                |          | 0   |         | 271 |
| 159 | CL156CONTIG1 | REF NP_001088541.1  hypothetical protein LOC495415 [Xenopus laev... | NP_001088541.1 | 4,00E-15 | 61  | 41/67   | 319 |
| 160 | CL157CONTIG1 | no blast match                                                      |                |          | 0   |         | 109 |
| 161 | CL158CONTIG1 | no blast match                                                      |                |          | 0   |         | 146 |
| 162 | CL159CONTIG1 | GB AAY66836.1  ribosomal protein L37A [Ixodes scapularis]           | AAY66836.1     | 1,00E-14 | 79  | 35/44   | 169 |

|     |              |                                                                      |                |           |     |         |     |
|-----|--------------|----------------------------------------------------------------------|----------------|-----------|-----|---------|-----|
| 163 | CL160CONTIG1 | GB AAR85887.1  non-muscle actin [Hydra viridis]                      | AAR85887.1     | 4,00E-24  | 98  | 53/54   | 162 |
| 164 | CL161CONTIG1 | no blast match                                                       |                |           | 0   |         | 138 |
| 165 | CL162CONTIG1 | no blast match                                                       |                |           | 0   |         | 218 |
| 166 | CL163CONTIG1 | no blast match                                                       |                |           | 0   |         | 304 |
| 167 | CL164CONTIG1 | GB AAN05585.1  ribosomal protein L22 [Argopecten irradians]          | AAN05585.1     | 3,00E-16  | 80  | 38/47   | 155 |
| 168 | CL165CONTIG1 | no blast match                                                       |                |           | 0   |         | 210 |
| 169 | CL166CONTIG1 | no blast match                                                       |                |           | 0   |         | 138 |
| 170 | CL167CONTIG1 | no blast match                                                       |                |           | 0   |         | 218 |
| 171 | CL168CONTIG1 | no blast match                                                       |                |           | 0   |         | 147 |
| 172 | CL169CONTIG1 | REF XP_001363619.1  PREDICTED: similar to eukaryotic translation...  | XP_001363619.1 | 5,00E-35  | 72  | 70/97   | 339 |
| 173 | CL170CONTIG1 | no blast match                                                       |                |           | 0   |         | 391 |
| 174 | CL171CONTIG1 | REF XP_001175487.1  PREDICTED: similar to peptidylprolyl isomera...  | XP_001175487.1 | 4,00E-41  | 74  | 82/110  | 430 |
| 175 | CL172CONTIG1 | REF XP_780685.2  PREDICTED: similar to cysteine-rich repeat-cont...  | XP_780685.2    | 9,00E-13  | 39  | 34/86   | 338 |
| 176 | CL173CONTIG1 | GB ABR19841.1  minicollagen-15 [Hydra vulgaris]                      | ABR19841.1     | 5,00E-76  | 99  | 126/127 | 382 |
| 177 | CL174CONTIG1 | no blast match                                                       |                |           | 0   |         | 428 |
| 178 | CL175CONTIG1 | no blast match                                                       |                |           | 0   |         | 425 |
| 179 | CL176CONTIG1 | no blast match                                                       |                |           | 0   |         | 414 |
| 180 | CL177CONTIG1 | GB EAT43097.1  mitochondrial processing peptidase beta subunit [...] | EAT43097.1     | 9,00E-43  | 56  | 81/143  | 430 |
| 181 | CL178CONTIG1 | no blast match                                                       |                |           | 0   |         | 475 |
| 182 | CL179CONTIG1 | DBJ BAB13308.1  vasa-related protein CnVAS2 [Hydra magnipapillata]   | BAB13308.1     | 2,00E-30  | 100 | 61/61   | 425 |
| 183 | CL180CONTIG1 | GB AAH24126.1  Dmgdh protein [Mus musculus]                          | AAH24126.1     | 3,00E-20  | 53  | 43/81   | 452 |
| 184 | CL181CONTIG1 | GB ABD15177.1  innexin 1 [Hydra vulgaris]                            | ABD15177.1     | 2,00E-27  | 45  | 63/137  | 419 |
| 185 | CL182CONTIG1 | GB EAT44074.1  preprotein translocase secy subunit (sec61) [Aede...  | EAT44074.1     | 1,00E-51  | 77  | 101/131 | 391 |
| 186 | CL183CONTIG1 | REF XP_001490432.1  PREDICTED: similar to DnaJ protein [Equus ca...  | XP_001490432.1 | 1,00E-43  | 59  | 83/140  | 418 |
| 187 | CL184CONTIG1 | no blast match                                                       |                |           | 0   |         | 371 |
| 188 | CL185CONTIG1 | EMB CAN67061.1  hypothetical protein [Vitis vinifera]                | CAN67061.1     | 7,00E-06  | 44  | 27/61   | 314 |
| 189 | CL186CONTIG1 | GB AAS01181.1  Cniwi [Podocoryne carnea]                             | AAS01181.1     | 4,00E-39  | 73  | 76/104  | 314 |
| 190 | CL187CONTIG1 | REF NP_001080575.1  interleukin enhancer binding factor 2, 45kDa...  | NP_001080575.1 | 1,00E-39  | 62  | 77/123  | 369 |
| 191 | CL188CONTIG1 | EMB CAM37732.1  flagellar calcium-binding protein, putative [Lei...  | CAM37732.1     | 8,00E-07  | 34  | 35/102  | 321 |
| 192 | CL189CONTIG1 | REF ZP_01303848.1  glycine cleavage system protein H [Sphingomon...  | ZP_01303848.1  | 2,00E-19  | 63  | 43/68   | 320 |
| 193 | CL190CONTIG1 | SP P38976 RAS2_HYDMA Ras-like protein RAS2 precursor >gil1140 e...   | P38976         | 1,00E-19  | 100 | 50/50   | 335 |
| 194 | CL191CONTIG1 | REF XP_001519193.1  PREDICTED: similar to dynein, light chain, L...  | XP_001519193.1 | 2,00E-08  | 96  | 27/28   | 299 |
| 195 | CL192CONTIG1 | no blast match                                                       |                |           | 0   |         | 337 |
| 196 | CL193CONTIG1 | no blast match                                                       |                |           | 0   |         | 326 |
| 197 | CL194CONTIG1 | no blast match                                                       |                |           | 0   |         | 382 |
| 198 | CL195CONTIG1 | EMB CAG03540.1  unnamed protein product [Tetraodon nigroviridis]     | CAG03540.1     | 1,00E-47  | 87  | 94/108  | 326 |
| 199 | CL196CONTIG1 | no blast match                                                       |                |           | 0   |         | 425 |
| 200 | CL197CONTIG1 | REF NP_001005390.1  calpain, small subunit 1 [Danio rerio] >gil4...  | NP_001005390.1 | 2,00E-34  | 39  | 79/201  | 578 |
| 201 | CL198CONTIG1 | no blast match                                                       |                |           | 0   |         | 494 |
| 202 | CL199CONTIG1 | no blast match                                                       |                |           | 0   |         | 577 |
| 203 | CL200CONTIG1 | REF XP_001373181.1  PREDICTED: hypothetical protein [Monodelphis...  | XP_001373181.1 | 8,00E-28  | 46  | 63/135  | 453 |
| 204 | CL201CONTIG1 | no blast match                                                       |                |           | 0   |         | 480 |
| 205 | CL202CONTIG1 | DBJ BAE60632.1  unnamed protein product [Aspergillus oryzae]         | BAE60632.1     | 5,00E-09  | 28  | 35/123  | 519 |
| 206 | CL203CONTIG1 | REF XP_001376908.1  PREDICTED: hypothetical protein [Monodelphis...  | XP_001376908.1 | 3,00E-10  | 30  | 52/168  | 568 |
| 207 | CL204CONTIG1 | GB AAN71256.1  LD34409p [Drosophila melanogaster]                    | AAN71256.1     | 4,00E-66  | 73  | 129/175 | 923 |
| 208 | CL205CONTIG1 | no blast match                                                       |                |           | 0   |         | 568 |
| 209 | CL206CONTIG1 | REF XP_797203.2  PREDICTED: similar to rhamnose-binding lectin (...) | XP_797203.2    | 2,00E-33  | 42  | 77/183  | 603 |
| 210 | CL207CONTIG1 | DBJ BAA88337.1  ORF2 [Platymys spixii]                               | BAA88337.1     | 7,00E-09  | 34  | 37/107  | 614 |
| 211 | CL208CONTIG1 | EMB CAF90372.1  unnamed protein product [Tetraodon nigroviridis]     | CAF90372.1     | 5,00E-50  | 60  | 92/151  | 531 |
| 212 | CL209CONTIG1 | GB AAC31964.1  plasminogen-related serine protease [Hydra vulgaris]  | AAC31964.1     | 8,00E-26  | 86  | 51/59   | 356 |
| 213 | CL210CONTIG1 | no blast match                                                       |                |           | 0   |         | 458 |
| 214 | CL211CONTIG1 | REF XP_001234035.1  PREDICTED: similar to Alport syndrome, menta...  | XP_001234035.1 | 2,00E-10  | 75  | 24/32   | 434 |
| 215 | CL212CONTIG1 | no blast match                                                       |                |           | 0   |         | 410 |
| 216 | CL213CONTIG1 | REF XP_606010.3  PREDICTED: hypothetical protein [Bos taurus]        | XP_606010.3    | 1,00E-42  | 59  | 82/137  | 414 |
| 217 | CL214CONTIG1 | REF YP_503988.1  hypothetical protein Mhun_2572 [Methanospirillum... | YP_503988.1    | 9,00E-08  | 38  | 22/57   | 480 |
| 218 | CL215CONTIG1 | REF XP_872039.1  PREDICTED: similar to histidase [Bos taurus]        | XP_872039.1    | 1,00E-100 | 77  | 178/231 | 695 |
| 219 | CL216CONTIG1 | REF XP_797462.2  PREDICTED: similar to beta1-syntrophin [Strongy...  | XP_797462.2    | 4,00E-42  | 54  | 77/141  | 402 |
| 220 | CL217CONTIG1 | REF NP_997684.1  translocase of outer mitochondrial membrane 70 ...  | NP_997684.1    | 7,00E-32  | 54  | 66/121  | 401 |
| 221 | CL218CONTIG1 | REF XP_795871.1  PREDICTED: similar to De-etiolated homolog 1 (A...  | XP_795871.1    | 8,00E-47  | 57  | 89/156  | 476 |
| 222 | CL219CONTIG1 | GB EDN28930.1  predicted protein [Botryotinia fuckeliana B05.10]     | EDN28930.1     | 4,00E-11  | 37  | 45/119  | 474 |
| 223 | CL220CONTIG1 | GB AAA29218.2  tyrosine kinase receptor [Hydra vulgaris]             | AAA29218.2     | 3,00E-16  | 32  | 50/155  | 524 |
| 224 | CL221CONTIG1 | REF XP_786637.1  PREDICTED: hypothetical protein [Strongylocentr...  | XP_786637.1    | 9,00E-20  | 67  | 40/59   | 507 |
| 225 | CL222CONTIG1 | no blast match                                                       |                |           | 0   |         | 464 |
| 226 | CL223CONTIG1 | no blast match                                                       |                |           | 0   |         | 460 |
| 227 | CL224CONTIG1 | no blast match                                                       |                |           | 0   |         | 231 |
| 228 | CL225CONTIG1 | GB AAP92326.1  IAP-associated factor Vif1 [Branchiostoma belche...   | AAP92326.1     | 3,00E-59  | 61  | 110/178 | 543 |
| 229 | CL226CONTIG1 | EMB CAD91421.1  ribosomal protein L5 [Crassostrea gigas]             | CAD91421.1     | 5,00E-25  | 75  | 56/74   | 226 |
| 230 | CL227CONTIG1 | no blast match                                                       |                |           | 0   |         | 301 |
| 231 | CL228CONTIG1 | GB EAW49948.1  KIAA0690, isoform CRA_c [Homo sapiens]                | EAW49948.1     | 8,00E-17  | 68  | 41/60   | 208 |
| 232 | CL229CONTIG1 | GB AAR24460.1  tropomyosin [Nematostella vectensis]                  | AAR24460.1     | 3,00E-14  | 43  | 41/95   | 370 |
| 233 | CL230CONTIG1 | GB AAG30574.1 AF312857_1 latrophilin-related protein [Hydra vulg...  | AAG30574.1     | 1,00E-06  | 57  | 23/40   | 188 |
| 234 | CL231CONTIG1 | REF XP_794884.2  PREDICTED: similar to putative porin precursor ...  | XP_794884.2    | 5,00E-07  | 35  | 28/78   | 233 |
| 235 | CL232CONTIG1 | no blast match                                                       |                |           | 0   |         | 355 |
| 236 | CL233CONTIG1 | GB AAR31143.1  zebra precursor; HyZebra [Hydra magnipapillata]       | AAR31143.1     | 5,00E-39  | 100 | 81/81   | 255 |
| 237 | CL234CONTIG1 | GB ABG46423.1  ribosomal protein S26 [Pectinaria gouldii]            | ABG46423.1     | 3,00E-25  | 91  | 55/60   | 181 |
| 238 | CL235CONTIG1 | no blast match                                                       |                |           | 0   |         | 232 |
| 239 | CL236CONTIG1 | REF XP_788786.2  PREDICTED: similar to matrix metalloproteinase ...  | XP_788786.2    | 2,00E-09  | 56  | 28/50   | 166 |
| 240 | CL237CONTIG1 | REF NP_001089459.1  hypothetical protein LOC734509 [Xenopus laev...  | NP_001089459.1 | 6,00E-33  | 82  | 64/78   | 248 |
| 241 | CL238CONTIG1 | REF XP_395013.2  PREDICTED: similar to GTP-binding protein CG252...  | XP_395013.2    | 7,00E-48  | 81  | 95/116  | 352 |
| 242 | CL239CONTIG1 | no blast match                                                       |                |           | 0   |         | 281 |
| 243 | CL240CONTIG1 | no blast match                                                       |                |           | 0   |         | 281 |
| 244 | CL241CONTIG1 | no blast match                                                       |                |           | 0   |         | 291 |
| 245 | CL242CONTIG1 | no blast match                                                       |                |           | 0   |         | 421 |
| 246 | CL243CONTIG1 | GB EAT35698.1  activin receptor type I, putative [Aedes aegypti]     | EAT35698.1     | 4,00E-36  | 52  | 73/139  | 442 |
| 247 | CL244CONTIG1 | no blast match                                                       |                |           | 0   |         | 307 |
| 248 | CL245CONTIG1 | no blast match                                                       |                |           | 0   |         | 217 |
| 249 | CL246CONTIG1 | REF XP_001364734.1  PREDICTED: similar to glyceraldehyde-3-phosp...  | XP_001364734.1 | 3,00E-21  | 68  | 49/72   | 220 |
| 250 | CL247CONTIG1 | no blast match                                                       |                |           | 0   |         | 220 |
| 251 | CL248CONTIG1 | no blast match                                                       |                |           | 0   |         | 305 |
| 252 | CL249CONTIG1 | GB AAO86696.1  selenoprotein W1 [Danio rerio]                        | AAO86696.1     | 2,00E-15  | 53  | 38/71   | 312 |

|     |              |                                                                                        |                |          |     |         |     |
|-----|--------------|----------------------------------------------------------------------------------------|----------------|----------|-----|---------|-----|
| 253 | CL250CONTIG1 | no blast match                                                                         |                |          | 0   |         | 231 |
| 254 | CL251CONTIG1 | REF XP_310465.2  ENSANGP00000007334 [Anopheles gambiae str. PEST...                    | XP_310465.2    | 3,00E-34 | 92  | 74/80   | 242 |
| 255 | CL252CONTIG1 | no blast match                                                                         |                |          | 0   |         | 371 |
| 256 | CL253CONTIG1 | GB AAN87349.1  14-3-3 protein A [Hydra vulgaris]                                       | AAN87349.1     | 2,00E-20 | 92  | 51/55   | 392 |
| 257 | CL254CONTIG1 | REF NP_001088024.1  hypothetical protein LOC494715 [Xenopus laevis]                    | NP_001088024.1 | 1,00E-40 | 63  | 79/124  | 378 |
| 258 | CL255CONTIG1 | REF NP_997766.1  survival motor neuron domain containing 1 [Drosophila melanogaster]   | NP_997766.1    | 2,00E-13 | 56  | 44/78   | 368 |
| 259 | CL256CONTIG1 | REF XP_001376304.1  PREDICTED: similar to transmembrane protease...                    | XP_001376304.1 | 5,00E-24 | 46  | 55/118  | 379 |
| 260 | CL257CONTIG1 | no blast match                                                                         |                |          | 0   |         | 398 |
| 261 | CL258CONTIG1 | GB AAR09674.1  similar to Drosophila melanogaster RpS25 [Drosophila melanogaster]      | AAR09674.1     | 4,00E-37 | 71  | 83/116  | 415 |
| 262 | CL259CONTIG1 | REF NP_001080783.1  transgelin 2 [Xenopus laevis] >gij 28436827 g...                   | NP_001080783.1 | 4,00E-20 | 43  | 50/116  | 390 |
| 263 | CL260CONTIG1 | REF NP_001085851.1  MGC80911 protein [Xenopus laevis] >gij 491155...                   | NP_001085851.1 | 2,00E-14 | 60  | 36/60   | 307 |
| 264 | CL261CONTIG1 | REF XP_797203.2  PREDICTED: similar to rhamnose-binding lectin (...)                   | XP_797203.2    | 6,00E-17 | 50  | 43/85   | 318 |
| 265 | CL262CONTIG1 | no blast match                                                                         |                |          | 0   |         | 401 |
| 266 | CL263CONTIG1 | EMB CAL36995.1  chitinase 2 [Hydractinia echinata]                                     | CAL36995.1     | 2,00E-68 | 62  | 121/194 | 585 |
| 267 | CL264CONTIG1 | no blast match                                                                         |                |          | 0   |         | 364 |
| 268 | CL265CONTIG1 | REF NP_001011456.1  eukaryotic translation initiation factor 2, ...                    | NP_001011456.1 | 2,00E-57 | 84  | 106/125 | 379 |
| 269 | CL266CONTIG1 | REF XP_643401.1  hypothetical protein DDBDRAFT_0167292 [Dictyostelium discoideum]      | XP_643401.1    | 2,00E-16 | 50  | 37/73   | 246 |
| 270 | CL267CONTIG1 | no blast match                                                                         |                |          | 0   |         | 247 |
| 271 | CL268CONTIG1 | no blast match                                                                         |                |          | 0   |         | 260 |
| 272 | CL269CONTIG1 | no blast match                                                                         |                |          | 0   |         | 236 |
| 273 | CL270CONTIG1 | no blast match                                                                         |                |          | 0   |         | 238 |
| 274 | CL271CONTIG1 | GB ABC25037.1  ribosomal protein S19 [Hydra vulgaris]                                  | ABC25037.1     | 1,00E-38 | 98  | 80/81   | 244 |
| 275 | CL272CONTIG1 | no blast match                                                                         |                |          | 0   |         | 286 |
| 276 | CL273CONTIG1 | REF XP_967161.1  PREDICTED: similar to CG8053-PA, isoform A [Tripterygion reticulatum] | XP_967161.1    | 4,00E-48 | 90  | 90/99   | 347 |
| 277 | CL274CONTIG1 | REF XP_640451.1  hypothetical protein DDBDRAFT_0204239 [Dictyostelium discoideum]      | XP_640451.1    | 3,00E-11 | 75  | 31/41   | 357 |
| 278 | CL275CONTIG1 | no blast match                                                                         |                |          | 0   |         | 330 |
| 279 | CL276CONTIG1 | no blast match                                                                         |                |          | 0   |         | 264 |
| 280 | CL277CONTIG1 | no blast match                                                                         |                |          | 0   |         | 333 |
| 281 | CL278CONTIG1 | no blast match                                                                         |                |          | 0   |         | 347 |
| 282 | CV284052.1   | no blast match                                                                         |                |          | 0   |         | 354 |
| 283 | CV284056.1   | no blast match                                                                         |                |          | 0   |         | 271 |
| 284 | CV284060.1   | GB ABC96783.1  carbonic anhydrase FCA-b [Fungia scutaria]                              | ABC96783.1     | 9,00E-11 | 36  | 40/111  | 368 |
| 285 | CV284061.1   | no blast match                                                                         |                |          | 0   |         | 160 |
| 286 | CV284064.1   | no blast match                                                                         |                |          | 0   |         | 295 |
| 287 | CV284066.1   | no blast match                                                                         |                |          | 0   |         | 267 |
| 288 | CV284069.1   | REF XP_214199.3  PREDICTED: similar to RANBP4 [Rattus norvegicus]                      | XP_214199.3    | 1,00E-09 | 43  | 35/80   | 326 |
| 289 | CV284071.1   | REF XP_418682.1  PREDICTED: similar to MGC83241 protein [Gallus gallus]                | XP_418682.1    | 5,00E-33 | 50  | 67/132  | 545 |
| 290 | CV284085.1   | no blast match                                                                         |                |          | 0   |         | 140 |
| 291 | CV284087.1   | no blast match                                                                         |                |          | 0   |         | 125 |
| 292 | CV284091.1   | no blast match                                                                         |                |          | 0   |         | 349 |
| 293 | CV284092.1   | no blast match                                                                         |                |          | 0   |         | 359 |
| 294 | CV284093.1   | no blast match                                                                         |                |          | 0   |         | 232 |
| 295 | CV284104.1   | no blast match                                                                         |                |          | 0   |         | 111 |
| 296 | CV284106.1   | EMB CAN70956.1  hypothetical protein [Vitis vinifera]                                  | CAN70956.1     | 2,00E-13 | 35  | 37/103  | 467 |
| 297 | CV284110.1   | no blast match                                                                         |                |          | 0   |         | 231 |
| 298 | CV284115.1   | no blast match                                                                         |                |          | 0   |         | 313 |
| 299 | CV284116.1   | REF XP_001333195.1  PREDICTED: similar to Adrm1b protein [Danio rerio]                 | XP_001333195.1 | 2,00E-07 | 52  | 32/61   | 212 |
| 300 | CV284122.1   | REF XP_001178247.1  PREDICTED: hypothetical protein [Strongylocentrotus purpuratus]    | XP_001178247.1 | 4,00E-08 | 47  | 27/57   | 319 |
| 301 | CV284126.1   | no blast match                                                                         |                |          | 0   |         | 515 |
| 302 | CV284127.1   | GB AAO60428.1  chordin-like protein [Hydra magnipapillata]                             | AAO60428.1     | 9,00E-08 | 33  | 32/95   | 371 |
| 303 | CV284136.1   | REF NP_999767.1  metalloproteinase SpAn [Strongylocentrotus purpuratus]                | NP_999767.1    | 1,00E-21 | 44  | 60/136  | 389 |
| 304 | CV284143.1   | REF XP_795093.2  PREDICTED: hypothetical protein [Strongylocentrotus purpuratus]       | XP_795093.2    | 4,00E-13 | 52  | 32/61   | 382 |
| 305 | CV284144.1   | REF XP_972804.1  PREDICTED: similar to CG30185-PA [Tribolium castaneum]                | XP_972804.1    | 2,00E-08 | 30  | 37/123  | 438 |
| 306 | CV284147.1   | no blast match                                                                         |                |          | 0   |         | 248 |
| 307 | CV284149.1   | REF XP_001335539.1  PREDICTED: similar to mannosyl (alpha-1,6)-...                     | XP_001335539.1 | 2,00E-08 | 50  | 27/53   | 313 |
| 308 | CV284150.1   | REF NP_718081.1  zinc-dependent metalloproteinase [Shewanella oneidensis]              | NP_718081.1    | 6,00E-09 | 46  | 26/56   | 312 |
| 309 | CV284155.1   | no blast match                                                                         |                |          | 0   |         | 230 |
| 310 | CV284156.1   | GB ABC25042.1  chitinase [Hydra vulgaris]                                              | ABC25042.1     | 5,00E-22 | 82  | 47/57   | 255 |
| 311 | CV284164.1   | no blast match                                                                         |                |          | 0   |         | 353 |
| 312 | CV284165.1   | REF NP_001069850.1  microsomal glutathione S-transferase 2 [Bos taurus]                | NP_001069850.1 | 1,00E-17 | 50  | 43/86   | 339 |
| 313 | CV284166.1   | no blast match                                                                         |                |          | 0   |         | 174 |
| 314 | CV284167.1   | REF XP_001199439.1  PREDICTED: hypothetical protein [Strongylocentrotus purpuratus]    | XP_001199439.1 | 7,00E-16 | 38  | 41/107  | 332 |
| 315 | CV284171.1   | REF NP_001041438.1  hypothetical protein LOC503325 [Rattus norvegicus]                 | NP_001041438.1 | 7,00E-07 | 39  | 21/53   | 381 |
| 316 | CV284172.1   | no blast match                                                                         |                |          | 0   |         | 291 |
| 317 | CV284175.1   | SP P38977 ANTA_HYDMA Antistatin precursor (ATS) (Blood coagulation factor X)           | P38977         | 1,00E-20 | 69  | 44/63   | 220 |
| 318 | CV284176.1   | no blast match                                                                         |                |          | 0   |         | 287 |
| 319 | CV284178.1   | no blast match                                                                         |                |          | 0   |         | 158 |
| 320 | CV284180.1   | SP P51554 EF1A_HYDAT Elongation factor 1-alpha (EF-1-alpha) >gij ...                   | P51554         | 2,00E-47 | 100 | 91/91   | 362 |
| 321 | CV284181.1   | REF NP_001029440.1  DnaJ (Hsp40) homolog, subfamily B, member 11...                    | NP_001029440.1 | 8,00E-06 | 58  | 23/39   | 505 |
| 322 | CV284182.1   | no blast match                                                                         |                |          | 0   |         | 305 |
| 323 | CV284183.1   | REF NP_001085392.1  MGC79007 protein [Xenopus laevis] >gij 487346...                   | NP_001085392.1 | 2,00E-10 | 62  | 31/50   | 246 |
| 324 | CV284186.1   | REF XP_001306517.1  variable membrane protein precursor, putativ...                    | XP_001306517.1 | 1,00E-06 | 21  | 42/198  | 531 |
| 325 | CV284187.1   | REF XP_551775.2  ENSANGP000000026077 [Anopheles gambiae str. PEST...                   | XP_551775.2    | 2,00E-28 | 56  | 60/107  | 378 |
| 326 | CV284189.1   | REF XP_791196.1  PREDICTED: similar to 3-hydroxyisobutyryl-Coenz...                    | XP_791196.1    | 7,00E-14 | 44  | 37/83   | 249 |
| 327 | CV284191.1   | GB AAT06123.1  fructose-bisphosphate aldolase [Obelia sp. KJP-2004]                    | AAT06123.1     | 4,00E-33 | 83  | 69/83   | 255 |
| 328 | CV284192.1   | GB AAX48900.1  S24 [Suberites domuncula]                                               | AAX48900.1     | 4,00E-11 | 81  | 30/37   | 132 |
| 329 | CV284197.1   | no blast match                                                                         |                |          | 0   |         | 539 |
| 330 | CV284199.1   | no blast match                                                                         |                |          | 0   |         | 165 |
| 331 | CV284200.1   | REF XP_001341283.1  PREDICTED: similar to cysteine-rich motor ne...                    | XP_001341283.1 | 6,00E-07 | 46  | 21/45   | 291 |
| 332 | CV284202.1   | REF NP_001007880.1  shmt2 protein [Xenopus tropicalis] >gij 51259...                   | NP_001007880.1 | 3,00E-34 | 70  | 73/103  | 309 |
| 333 | CV284212.1   | REF YP_054549.1  cytochrome c oxidase subunit III [Squilla mantis]                     | YP_054549.1    | 4,00E-34 | 66  | 74/111  | 334 |
| 334 | CV284216.1   | REF NP_001032653.1  hypothetical protein LOC641566 [Danio rerio]                       | NP_001032653.1 | 2,00E-53 | 83  | 99/118  | 356 |
| 335 | CV284219.1   | no blast match                                                                         |                |          | 0   |         | 129 |
| 336 | CV284222.1   | DBJ BAD92713.1  importin 4 variant [Homo sapiens]                                      | BAD92713.1     | 2,00E-14 | 48  | 30/62   | 327 |
| 337 | CV284228.1   | no blast match                                                                         |                |          | 0   |         | 103 |
| 338 | CV284235.1   | REF XP_312404.2  ENSANGP00000022132 [Anopheles gambiae str. PEST...                    | XP_312404.2    | 5,00E-35 | 68  | 75/110  | 329 |
| 339 | CV284239.1   | no blast match                                                                         |                |          | 0   |         | 443 |
| 340 | CV284251.1   | DBJ BAF65668.1  tubular mastigoneme protein [Ochromonas danica]                        | BAF65668.1     | 8,00E-26 | 66  | 56/84   | 382 |
| 341 | CV284263.1   | no blast match                                                                         |                |          | 0   |         | 194 |
| 342 | CV284267.1   | GB AAR01286.1  elongation factor-2 [Ctenolepisma lineata]                              | AAR01286.1     | 3,00E-26 | 86  | 53/61   | 190 |

|     |            |                                                                     |                |          |     |         |  |     |
|-----|------------|---------------------------------------------------------------------|----------------|----------|-----|---------|--|-----|
| 343 | CV284281.1 | no blast match                                                      |                |          |     | 0       |  | 211 |
| 344 | CV284282.1 | REF XP_394752.2  PREDICTED: similar to Actin-related protein 8 i... | XP_394752.2    | 3,00E-12 | 62  | 31/50   |  | 394 |
| 345 | CV284296.1 | no blast match                                                      |                |          | 0   |         |  | 279 |
| 346 | CV284299.1 | no blast match                                                      |                |          | 0   |         |  | 194 |
| 347 | CV284301.1 | no blast match                                                      |                |          | 0   |         |  | 156 |
| 348 | CV284310.1 | REF XP_001518180.1  PREDICTED: similar to alpha NAC/1.9.2. prote... | XP_001518180.1 | 6,00E-18 | 84  | 45/53   |  | 160 |
| 349 | CV284648.1 | GB AAH06719.1  2900073G15Rik protein [Mus musculus]                 | AAH06719.1     | 6,00E-29 | 76  | 61/80   |  | 433 |
| 350 | CV284649.1 | EMB CAF94178.1  unnamed protein product [Tetraodon nigroviridis]    | CAF94178.1     | 2,00E-37 | 72  | 74/102  |  | 395 |
| 351 | CV284651.1 | REF XP_001342769.1  PREDICTED: hypothetical protein LOC449654 [D... | XP_001342769.1 | 4,00E-14 | 56  | 37/65   |  | 267 |
| 352 | CV284652.1 | no blast match                                                      |                |          | 0   |         |  | 305 |
| 353 | CV284653.1 | EMB CAE57636.1  Hypothetical protein CBG00621 [Caenorhabditis br... | CAE57636.1     | 9,00E-30 | 57  | 61/106  |  | 321 |
| 354 | CV284660.1 | REF XP_865910.1  PREDICTED: similar to Malate dehydrogenase, cyt... | XP_865910.1    | 5,00E-06 | 53  | 26/49   |  | 211 |
| 355 | CV284663.1 | GB ABC25036.1  ribosomal protein S9 [Hydra vulgaris]                | ABC25036.1     | 1,00E-11 | 100 | 32/32   |  | 260 |
| 356 | CV284670.1 | no blast match                                                      |                |          | 0   |         |  | 472 |
| 357 | CV284676.1 | no blast match                                                      |                |          | 0   |         |  | 277 |
| 358 | CV284677.1 | no blast match                                                      |                |          | 0   |         |  | 215 |
| 359 | CV284680.1 | EMB CAF91608.1  unnamed protein product [Tetraodon nigroviridis]    | CAF91608.1     | 3,00E-09 | 56  | 27/48   |  | 147 |
| 360 | CV284682.1 | GB EAT48185.1  platelet-activating factor acetylhydrolase isofo...  | EAT48185.1     | 2,00E-15 | 72  | 36/50   |  | 155 |
| 361 | CV284684.1 | no blast match                                                      |                |          | 0   |         |  | 391 |
| 362 | CV284685.1 | no blast match                                                      |                |          | 0   |         |  | 481 |
| 363 | CV284688.1 | REF NP_001080153.1  actin related protein 2/3 complex, subunit 1... | NP_001080153.1 | 6,00E-65 | 63  | 122/192 |  | 574 |
| 364 | CV284690.1 | no blast match                                                      |                |          | 0   |         |  | 452 |
| 365 | CV284698.1 | no blast match                                                      |                |          | 0   |         |  | 256 |
| 366 | CV284703.1 | no blast match                                                      |                |          | 0   |         |  | 249 |
| 367 | CV284705.1 | GB AAH41538.1  LOC398543 protein [Xenopus laevis]                   | AAH41538.1     | 3,00E-09 | 35  | 37/104  |  | 378 |
| 368 | CV284706.1 | no blast match                                                      |                |          | 0   |         |  | 282 |
| 369 | CV284707.1 | EMB CAC81066.1  putative cyclosporin A-binding protein [Picea ab... | CAC81066.1     | 1,00E-25 | 86  | 53/61   |  | 187 |
| 370 | CV284708.1 | no blast match                                                      |                |          | 0   |         |  | 271 |
| 371 | CV284712.1 | REF XP_001189047.1  PREDICTED: similar to rhamnose-binding lecti... | XP_001189047.1 | 2,00E-15 | 50  | 43/85   |  | 259 |
| 372 | CV284713.1 | no blast match                                                      |                |          | 0   |         |  | 144 |
| 373 | CV284717.1 | REF XP_001198770.1  PREDICTED: hypothetical protein, partial [St... | XP_001198770.1 | 7,00E-11 | 58  | 35/60   |  | 201 |
| 374 | CV284718.1 | EMB CAJ33888.1  putative serine protease inhibitor [Hydra vulgaris] | CAJ33888.1     | 9,00E-11 | 76  | 30/39   |  | 190 |
| 375 | CV284721.1 | REF XP_783617.2  PREDICTED: similar to membrane alanine aminopep... | XP_783617.2    | 3,00E-14 | 35  | 39/109  |  | 328 |
| 376 | CV284734.1 | GB AAR31143.1  zebra precursor, HyZebra [Hydra magnipapillata]      | AAR31143.1     | 9,00E-07 | 38  | 17/44   |  | 343 |
| 377 | CV284741.1 | no blast match                                                      |                |          | 0   |         |  | 300 |
| 378 | CV284745.1 | REF NP_001084775.1  hypothetical protein LOC431811 [Xenopus laev... | NP_001084775.1 | 1,00E-30 | 80  | 62/77   |  | 277 |
| 379 | CV284746.1 | no blast match                                                      |                |          | 0   |         |  | 384 |
| 380 | CV284751.1 | no blast match                                                      |                |          | 0   |         |  | 111 |
| 381 | CV284756.1 | SP Q08699 RS14_PODCA 40S ribosomal protein S14 >gil396252 emb CA... | Q08699         | 5,00E-61 | 94  | 119/126 |  | 410 |
| 382 | CV284757.1 | EMB CAJ33888.1  putative serine protease inhibitor [Hydra vulgaris] | CAJ33888.1     | 4,00E-12 | 85  | 30/35   |  | 396 |
| 383 | CV284762.1 | no blast match                                                      |                |          | 0   |         |  | 184 |
| 384 | CV284763.1 | EMB CAG07935.1  unnamed protein product [Tetraodon nigroviridis]    | CAG07935.1     | 9,00E-08 | 40  | 26/64   |  | 280 |
| 385 | CV284764.1 | GB AAI30057.1  LOC495430 protein [Xenopus laevis]                   | AAI30057.1     | 9,00E-27 | 58  | 55/94   |  | 308 |
| 386 | CV284766.1 | GB ABQ22499.1  vacuolar ATP synthase 16 kDa proteolipid subunit...  | ABQ22499.1     | 9,00E-16 | 93  | 44/47   |  | 192 |
| 387 | CV284767.1 | REF XP_696748.2  PREDICTED: hypothetical protein [Danio rerio]      | XP_696748.2    | 6,00E-34 | 62  | 61/97   |  | 293 |
| 388 | CV284769.1 | no blast match                                                      |                |          | 0   |         |  | 339 |
| 389 | CV284771.1 | GB AAX48842.1  L10a [Suberites domuncula]                           | AAX48842.1     | 1,00E-19 | 77  | 47/61   |  | 184 |
| 390 | CV284772.1 | no blast match                                                      |                |          | 0   |         |  | 375 |
| 391 | CV284781.1 | no blast match                                                      |                |          | 0   |         |  | 339 |
| 392 | CV284787.1 | no blast match                                                      |                |          | 0   |         |  | 150 |
| 393 | CV284792.1 | no blast match                                                      |                |          | 0   |         |  | 462 |
| 394 | CV284796.1 | no blast match                                                      |                |          | 0   |         |  | 180 |
| 395 | CV284797.1 | no blast match                                                      |                |          | 0   |         |  | 239 |
| 396 | CV284798.1 | no blast match                                                      |                |          | 0   |         |  | 358 |
| 397 | CV284805.1 | GB ABC25033.1  ribosomal protein L35 [Hydra vulgaris]               | ABC25033.1     | 5,00E-12 | 78  | 39/50   |  | 297 |
| 398 | CV284810.1 | no blast match                                                      |                |          | 0   |         |  | 433 |
| 399 | CV284813.1 | DBJ BAB13307.1  vasa-related protein CnVAS1 [Hydra magnipapillata]  | BAB13307.1     | 6,00E-42 | 100 | 87/87   |  | 264 |
| 400 | CV284814.1 | no blast match                                                      |                |          | 0   |         |  | 337 |
| 401 | CV284819.1 | no blast match                                                      |                |          | 0   |         |  | 160 |
| 402 | CV284820.1 | SP P38984 RSSA_CHLVR 40S ribosomal protein SA (p40) (33 kDa lami... | P38984         | 3,00E-79 | 94  | 144/153 |  | 476 |
| 403 | CV284827.1 | REF XP_677983.1  nucleoside diphosphate kinase b; [Plasmodium be... | XP_677983.1    | 4,00E-11 | 71  | 32/45   |  | 227 |
| 404 | CV284828.1 | REF NP_001085935.1  MGC82844 protein [Xenopus laevis] >gil492561... | NP_001085935.1 | 3,00E-06 | 80  | 24/30   |  | 113 |
| 405 | CV284829.1 | REF XP_001491740.1  PREDICTED: similar to DEAH (Asp-Glu-Ala-His)... | XP_001491740.1 | 3,00E-41 | 84  | 83/98   |  | 299 |
| 406 | CV284831.1 | no blast match                                                      |                |          | 0   |         |  | 445 |
| 407 | CV284834.1 | REF NP_001075331.1  ubiquitin [Equus caballus] >gil21070215 gb A... | NP_001075331.1 | 5,00E-19 | 66  | 46/69   |  | 208 |
| 408 | CV284839.1 | no blast match                                                      |                |          | 0   |         |  | 566 |
| 409 | CV284843.1 | REF XP_356642.1  PREDICTED: similar to ribosomal protein L10a [M... | XP_356642.1    | 4,00E-12 | 82  | 39/47   |  | 358 |
| 410 | CV284846.1 | GB EAT46335.1  DEAD box ATP-dependent RNA helicase [Aedes aegypti]  | EAT46335.1     | 4,00E-19 | 56  | 43/76   |  | 404 |
| 411 | CV284848.1 | no blast match                                                      |                |          | 0   |         |  | 228 |
| 412 | CV284855.1 | no blast match                                                      |                |          | 0   |         |  | 122 |
| 413 | CV284856.1 | DBJ BAF45891.1  ribosomal protein S3a [Solea senegalensis]          | BAF45891.1     | 2,00E-10 | 54  | 31/57   |  | 179 |
| 414 | CV284858.1 | REF XP_797404.1  PREDICTED: similar to C20orf18 [Strongylocentro... | XP_797404.1    | 2,00E-06 | 36  | 30/83   |  | 384 |
| 415 | CV284879.1 | PIR JB41132 collagen-related protein 2 - Hydra magnipapillata (f... |                | 4,00E-14 | 100 | 38/38   |  | 123 |
| 416 | CV284880.1 | no blast match                                                      |                |          | 0   |         |  | 145 |
| 417 | CV284885.1 | no blast match                                                      |                |          | 0   |         |  | 120 |
| 418 | CV284894.1 | no blast match                                                      |                |          | 0   |         |  | 111 |
| 419 | CV284914.1 | REF NP_001040276.1  ribosomal protein L7Ae [Bombyx mori] >gil872... | NP_001040276.1 | 9,00E-11 | 82  | 33/40   |  | 123 |
| 420 | CV284922.1 | EMB CAJ33888.1  putative serine protease inhibitor [Hydra vulgaris] | CAJ33888.1     | 3,00E-26 | 72  | 52/72   |  | 217 |
| 421 | CV284943.1 | EMB CAG10369.1  unnamed protein product [Tetraodon nigroviridis]    | CAG10369.1     | 1,00E-11 | 36  | 28/76   |  | 231 |
| 422 | CV284948.1 | no blast match                                                      |                |          | 0   |         |  | 118 |
| 423 | CV284953.1 | no blast match                                                      |                |          | 0   |         |  | 253 |
| 424 | CV284957.1 | EMB CAJ33888.1  putative serine protease inhibitor [Hydra vulgaris] | CAJ33888.1     | 6,00E-50 | 71  | 87/122  |  | 421 |
| 425 | CV284963.1 | no blast match                                                      |                |          | 0   |         |  | 247 |
| 426 | CV284988.1 | REF XP_001371488.1  PREDICTED: hypothetical protein [Monodelphis... | XP_001371488.1 | 9,00E-07 | 51  | 25/49   |  | 191 |
| 427 | CV284996.1 | no blast match                                                      |                |          | 0   |         |  | 113 |
| 428 | CV285005.1 | no blast match                                                      |                |          | 0   |         |  | 429 |
| 429 | CV285012.1 | no blast match                                                      |                |          | 0   |         |  | 500 |
| 430 | CV285022.1 | SP Q98SN8 S61A2_ONCMY Protein transport protein Sec61 subunit al... | Q98SN8         | 2,00E-09 | 90  | 30/33   |  | 100 |
| 431 | CV285030.1 | no blast match                                                      |                |          | 0   |         |  | 187 |
| 432 | CV285046.1 | REF XP_001520202.1  PREDICTED: similar to RBM25 protein [Ornitho... | XP_001520202.1 | 4,00E-11 | 73  | 33/45   |  | 205 |

Table S2  
KIEL 7 library

|     |            |                                                                      |                |          |     |         |     |
|-----|------------|----------------------------------------------------------------------|----------------|----------|-----|---------|-----|
| 433 | CV285047.1 | no blast match                                                       |                |          | 0   |         | 141 |
| 434 | CV285742.1 | REF XP_597181.3  PREDICTED: similar to vacuolar proton pump 116 ...  | XP_597181.3    | 2,00E-39 | 75  | 77/102  | 310 |
| 435 | CV285754.1 | no blast match                                                       |                |          | 0   |         | 199 |
| 436 | CV285766.1 | no blast match                                                       |                |          | 0   |         | 153 |
| 437 | CV285771.1 | no blast match                                                       |                |          | 0   |         | 398 |
| 438 | CV285792.1 | REF NP_733249.1  Heterogeneous nuclear ribonucleoprotein at 98DE...  | NP_733249.1    | 3,00E-08 | 40  | 32/80   | 310 |
| 439 | CV285804.1 | no blast match                                                       |                |          | 0   |         | 157 |
| 440 | CV285805.1 | no blast match                                                       |                |          | 0   |         | 277 |
| 441 | CV285815.1 | GB AAX48838.1  L7a [Suberites domuncula]                             | AAX48838.1     | 5,00E-15 | 71  | 42/59   | 194 |
| 442 | CV285823.1 | REF XP_001197762.1  PREDICTED: similar to NAD(P)H:quinone oxidor...  | XP_001197762.1 | 1,00E-20 | 37  | 56/150  | 530 |
| 443 | CV285824.1 | GB AAX09926.1  putative tyrosine-rich heat shock protein [Aureli...  | AAX09926.1     | 8,00E-15 | 63  | 33/52   | 178 |
| 444 | CV285825.1 | no blast match                                                       |                |          | 0   |         | 242 |
| 445 | CV285826.1 | no blast match                                                       |                |          | 0   |         | 361 |
| 446 | CV285828.1 | REF XP_001203886.1  PREDICTED: similar to Conserved oligomeric G...  | XP_001203886.1 | 2,00E-23 | 63  | 58/91   | 294 |
| 447 | CV285829.1 | REF ZP_01774245.1  conserved hypothetical protein [Geobacter bem...  | ZP_01774245.1  | 4,00E-15 | 42  | 72/170  | 816 |
| 448 | CV285834.1 | EMBL CAG02225.1  unnamed protein product [Tetraodon nigroviridis]    | CAG02225.1     | 2,00E-47 | 73  | 88/120  | 390 |
| 449 | CV285840.1 | no blast match                                                       |                |          | 0   |         | 187 |
| 450 | CV285841.1 | no blast match                                                       |                |          | 0   |         | 375 |
| 451 | CV285844.1 | no blast match                                                       |                |          | 0   |         | 191 |
| 452 | CV285845.1 | no blast match                                                       |                |          | 0   |         | 103 |
| 453 | CV285846.1 | DBJ BAB13308.1  vasa-related protein CnVAS2 [Hydra magnipapillata]   | BAB13308.1     | 3,00E-43 | 96  | 88/91   | 277 |
| 454 | CV285868.1 | GB AAX30301.1  unknown [Schistosoma japonicum]                       | AAX30301.1     | 9,00E-19 | 88  | 44/50   | 215 |
| 455 | CV285881.1 | GB EAT44394.1  oligosaccharyl transferase [Aedes aegypti]            | EAT44394.1     | 4,00E-58 | 88  | 104/117 | 359 |
| 456 | CV285885.1 | no blast match                                                       |                |          | 0   |         | 413 |
| 457 | CV285887.1 | no blast match                                                       |                |          | 0   |         | 291 |
| 458 | CV285892.1 | GB AAY66953.1  ribosomal protein L36 [Ixodes scapularis]             | AAY66953.1     | 2,00E-22 | 69  | 49/71   | 253 |
| 459 | CV285896.1 | no blast match                                                       |                |          | 0   |         | 397 |
| 460 | CV285898.1 | REF XP_966465.1  PREDICTED: similar to CG13391-PA, isoform A [Tr...  | XP_966465.1    | 1,00E-26 | 62  | 59/94   | 284 |
| 461 | CV285908.1 | REF XP_857983.1  PREDICTED: similar to N-acetyltransferase-like ...  | XP_857983.1    | 1,00E-06 | 42  | 32/75   | 324 |
| 462 | CV285912.1 | EMBL CAG08643.1  unnamed protein product [Tetraodon nigroviridis]    | CAG08643.1     | 1,00E-07 | 47  | 39/82   | 570 |
| 463 | CV285920.1 | REF NP_001016282.1  heat shock protein 90kDa alpha (cytosolic), ...  | NP_001016282.1 | 4,00E-27 | 65  | 59/90   | 341 |
| 464 | CV285922.1 | no blast match                                                       |                |          | 0   |         | 126 |
| 465 | CV285934.1 | REF NP_787020.1  NADH dehydrogenase (ubiquinone) 1 alpha subcomp...  | NP_787020.1    | 2,00E-21 | 45  | 49/108  | 604 |
| 466 | CV285937.1 | REF XP_001478155.1  PREDICTED: hypothetical protein [Mus musculus]   | XP_001478155.1 | 2,00E-08 | 33  | 49/146  | 944 |
| 467 | CV285942.1 | GB AAF24991.1  astacin family metalloendopeptidase FARM-1 [Hydra...  | AAF24991.1     | 3,00E-29 | 60  | 60/99   | 326 |
| 468 | CV285945.1 | REF NP_001016978.1  archaia [Xenopus tropicalis] >gij89271953 em...  | NP_001016978.1 | 6,00E-29 | 61  | 57/92   | 278 |
| 469 | CV285947.1 | REF NP_001014734.1  cacophony CG1522-PH, isoform H [Drosophila m...  | NP_001014734.1 | 1,00E-08 | 55  | 32/58   | 229 |
| 470 | CV285951.1 | no blast match                                                       |                |          | 0   |         | 334 |
| 471 | CV285952.1 | no blast match                                                       |                |          | 0   |         | 278 |
| 472 | CV285953.1 | GB ABA42878.1  small heat shock protein [uncultured cnidarian]       | ABA42878.1     | 2,00E-08 | 37  | 33/87   | 353 |
| 473 | CV285956.1 | REF YP_776995.1  hypothetical protein Bamb_5112 [Burkholderia ce...  | YP_776995.1    | 2,00E-25 | 41  | 69/165  | 496 |
| 474 | CV285963.1 | no blast match                                                       |                |          | 0   |         | 233 |
| 475 | CV285977.1 | no blast match                                                       |                |          | 0   |         | 185 |
| 476 | CV285989.1 | GB AAT00507.1  Kazal-like serine protease inhibitor EPI8 [Phytop...  | AAT00507.1     | 3,00E-07 | 43  | 22/51   | 320 |
| 477 | CV285995.1 | GB AAD43811.1 AF159157_1 head-activator binding protein precurs...   | AAD43811.1     | 1,00E-74 | 99  | 117/118 | 435 |
| 478 | CV286004.1 | no blast match                                                       |                |          | 0   |         | 182 |
| 479 | CV286005.1 | REF NP_001016677.1  nuclease sensitive element binding protein 1...  | NP_001016677.1 | 3,00E-17 | 61  | 46/75   | 311 |
| 480 | CV286006.1 | REF XP_001232777.1  PREDICTED: similar to stromelysin-3 [Gallus ...  | XP_001232777.1 | 2,00E-17 | 53  | 51/95   | 287 |
| 481 | CV286009.1 | REF NP_001050950.1  Os03g0690000 [Oryza sativa (japonica cultiva...  | NP_001050950.1 | 3,00E-16 | 75  | 41/54   | 269 |
| 482 | CV286012.1 | REF XP_792994.1  PREDICTED: similar to muscle protein 20-like pr...  | XP_792994.1    | 3,00E-11 | 52  | 37/70   | 223 |
| 483 | CV286014.1 | REF XP_392465.3  PREDICTED: similar to squid CG16901-PC, isoform...  | XP_392465.3    | 1,00E-14 | 35  | 55/155  | 538 |
| 484 | CV286016.1 | REF XP_391917.2  PREDICTED: similar to Adenosylhomocysteinase at...  | XP_391917.2    | 8,00E-23 | 67  | 55/82   | 247 |
| 485 | CV286027.1 | REF XP_512771.2  PREDICTED: similar to calmodulin [Pan troglodytes]  | XP_512771.2    | 3,00E-10 | 88  | 32/36   | 152 |
| 486 | CV286028.1 | no blast match                                                       |                |          | 0   |         | 186 |
| 487 | CV286031.1 | no blast match                                                       |                |          | 0   |         | 614 |
| 488 | CV286033.1 | no blast match                                                       |                |          | 0   |         | 189 |
| 489 | CV286048.1 | SP P26256 ANX12_HYDAT Annexin-B12 (Annexin-12) (Annexin XII) >gi...  | P26256         | 2,00E-49 | 100 | 100/100 | 303 |
| 490 | CV286050.1 | no blast match                                                       |                |          | 0   |         | 118 |
| 491 | CV286051.1 | no blast match                                                       |                |          | 0   |         | 145 |
| 492 | CV286052.1 | REF XP_656030.1  diaphanous protein [Entamoeba histolytica HM-1:...  | XP_656030.1    | 4,00E-08 | 40  | 36/89   | 322 |
| 493 | CV286060.1 | DBJ BAE90280.1  unnamed protein product [Macaca fascicularis]        | BAE90280.1     | 9,00E-35 | 81  | 72/88   | 343 |
| 494 | CV286065.1 | REF XP_612678.3  PREDICTED: hypothetical protein [Bos taurus]        | XP_612678.3    | 7,00E-06 | 92  | 24/26   | 342 |
| 495 | CV286066.1 | GB AAW26622.1  SJCHGC01809 protein [Schistosoma japonicum]           | AAW26622.1     | 1,00E-08 | 41  | 26/62   | 199 |
| 496 | CV286068.1 | REF XP_001373032.1  PREDICTED: hypothetical protein [Monodelphis...  | XP_001373032.1 | 6,00E-25 | 55  | 61/109  | 401 |
| 497 | CV286070.1 | no blast match                                                       |                |          | 0   |         | 163 |
| 498 | CV286071.1 | no blast match                                                       |                |          | 0   |         | 306 |
| 499 | CV286074.1 | EMBL CAK10829.1  novel protein similar to vertebrate CD151 antige... | CAK10829.1     | 5,00E-19 | 38  | 49/126  | 383 |
| 500 | CV286098.1 | no blast match                                                       |                |          | 0   |         | 307 |
| 501 | CV286110.1 | GB EAW96596.1  ovochymase 1, isoform CRA_b [Homo sapiens]            | EAW96596.1     | 3,00E-10 | 47  | 37/78   | 253 |
| 502 | CV286112.1 | REF NP_001069195.1  hypothetical protein LOC515723 [Bos taurus] ...  | NP_001069195.1 | 3,00E-38 | 48  | 72/150  | 487 |
| 503 | CV286115.1 | GB EAW61158.1  polypyrimidine tract binding protein 1, isoform C...  | EAW61158.1     | 6,00E-21 | 52  | 45/86   | 260 |
| 504 | CV286120.1 | GB AAA92361.2  metalloproteinase 1 [Hydra vulgaris]                  | AAA92361.2     | 8,00E-47 | 97  | 89/91   | 274 |
| 505 | CV286125.1 | GB ABL67655.1  putative cyclophilin [Citrus cv. Shiranuhi]           | ABL67655.1     | 7,00E-14 | 72  | 35/48   | 161 |
| 506 | CV286128.1 | REF XP_001353695.1  GA18578-PA [Drosophila pseudoobscura] >gij54...  | XP_001353695.1 | 1,00E-19 | 87  | 48/55   | 169 |
| 507 | CV286129.1 | no blast match                                                       |                |          | 0   |         | 202 |
| 508 | CV286133.1 | no blast match                                                       |                |          | 0   |         | 191 |
| 509 | CV286135.1 | no blast match                                                       |                |          | 0   |         | 296 |
| 510 | CV286138.1 | no blast match                                                       |                |          | 0   |         | 105 |
| 511 | CV286141.1 | no blast match                                                       |                |          | 0   |         | 295 |
| 512 | CV286151.1 | no blast match                                                       |                |          | 0   |         | 120 |
| 513 | CV286156.1 | no blast match                                                       |                |          | 0   |         | 286 |
