# Supplementary material for: A Novel Gene Family Controls Species-Specific Morphological Traits in Hydra
Source: PLoS Biol. 2008 Nov 18;6(11):e278. doi: 10.1371/journal.pbio.0060278 (PMC2586386; doi:10.1371/journal.pbio.0060278)
Supplement: Table S3 — Results of the BLASTN search of H. oligactis clusters and singletons from the Kiel 6 library against all H. magnipapillata ESTs. The cut-off value was set to E < 1e–10. Sequences with E value ≥ 1e–10 were referred to as having no significant similarity among H. magnipapillata ESTs (transcripts of potential H. oligactis-specific genes). (68 KB PDF) [file pbio.0060278.st003.pdf]

**Table S3****Kiel 6 (*Hydra oligactis* specific) SSH library. Results of BLASTN search against *Hydra* ESTs**

Results of the BLASTN search of *H. oligactis* clusters and singletons from Kiel 6 library against all *H. magnipapillata* ESTs. The cut-off value was set to  $E < 1e-10$ . Sequences with  $E \text{ value} \geq 1e-10$  were referred to as having no significant homology among *H. magnipapillata* ESTs (transcripts of potential *Hydra oligactis*-specific genes).

**Pct Idnt**, % identity between sequence in *H. oligactis* SSH library and best BLASTN match from *H. magnipapillata* ESTs

| Name         | Best blast match (with E-value < 1e-10) | Accession number | Expect | Pct Idnt |
|--------------|-----------------------------------------|------------------|--------|----------|
| CL9CONTIG1   | no blast match                          |                  |        | 0        |
| CL34CONTIG1  | no blast match                          |                  |        | 0        |
| CL44CONTIG1  | no blast match                          |                  |        | 0        |
| CL47CONTIG1  | no blast match                          |                  |        | 0        |
| CL51CONTIG1  | no blast match                          |                  |        | 0        |
| CL55CONTIG2  | no blast match                          |                  |        | 0        |
| CL58CONTIG1  | no blast match                          |                  |        | 0        |
| CL68CONTIG1  | no blast match                          |                  |        | 0        |
| CL74CONTIG1  | no blast match                          |                  |        | 0        |
| CL78CONTIG1  | no blast match                          |                  |        | 0        |
| CL93CONTIG1  | no blast match                          |                  |        | 0        |
| CL95CONTIG1  | no blast match                          |                  |        | 0        |
| CL98CONTIG1  | no blast match                          |                  |        | 0        |
| CL106CONTIG1 | no blast match                          |                  |        | 0        |
| CL109CONTIG1 | no blast match                          |                  |        | 0        |
| CL112CONTIG1 | no blast match                          |                  |        | 0        |
| CL117CONTIG1 | no blast match                          |                  |        | 0        |
| CL118CONTIG1 | no blast match                          |                  |        | 0        |
| CL137CONTIG1 | no blast match                          |                  |        | 0        |
| CL150CONTIG1 | no blast match                          |                  |        | 0        |
| CL152CONTIG1 | no blast match                          |                  |        | 0        |
| CL159CONTIG1 | no blast match                          |                  |        | 0        |
| CL164CONTIG1 | no blast match                          |                  |        | 0        |
| CL168CONTIG1 | no blast match                          |                  |        | 0        |
| CL170CONTIG1 | no blast match                          |                  |        | 0        |
| CL171CONTIG1 | no blast match                          |                  |        | 0        |
| CL174CONTIG1 | no blast match                          |                  |        | 0        |
| CL179CONTIG1 | no blast match                          |                  |        | 0        |
| CL183CONTIG1 | no blast match                          |                  |        | 0        |
| CL190CONTIG1 | no blast match                          |                  |        | 0        |
| CL191CONTIG1 | no blast match                          |                  |        | 0        |
| CL196CONTIG1 | no blast match                          |                  |        | 0        |
| CL211CONTIG1 | no blast match                          |                  |        | 0        |
| CL223CONTIG1 | no blast match                          |                  |        | 0        |
| CL225CONTIG1 | no blast match                          |                  |        | 0        |
| CL234CONTIG1 | no blast match                          |                  |        | 0        |
| CL240CONTIG1 | no blast match                          |                  |        | 0        |
| CV284328.1   | no blast match                          |                  |        | 0        |
| CV284335.1   | no blast match                          |                  |        | 0        |
| CV284337.1   | no blast match                          |                  |        | 0        |
| CV284359.1   | no blast match                          |                  |        | 0        |
| CV284419.1   | no blast match                          |                  |        | 0        |
| CV284425.1   | no blast match                          |                  |        | 0        |
| CV284430.1   | no blast match                          |                  |        | 0        |
| CV284439.1   | no blast match                          |                  |        | 0        |
| CV284458.1   | no blast match                          |                  |        | 0        |
| CV284539.1   | no blast match                          |                  |        | 0        |
| CV284555.1   | no blast match                          |                  |        | 0        |
| CV284569.1   | no blast match                          |                  |        | 0        |
| CV284636.1   | no blast match                          |                  |        | 0        |
| CV284638.1   | no blast match                          |                  |        | 0        |
| CV284639.1   | no blast match                          |                  |        | 0        |
| CV285062.1   | no blast match                          |                  |        | 0        |
| CV285070.1   | no blast match                          |                  |        | 0        |
| CV285087.1   | no blast match                          |                  |        | 0        |
| CV285128.1   | no blast match                          |                  |        | 0        |
| CV285163.1   | no blast match                          |                  |        | 0        |
| CV285186.1   | no blast match                          |                  |        | 0        |
| CV285197.1   | no blast match                          |                  |        | 0        |
| CV285198.1   | no blast match                          |                  |        | 0        |
| CV285199.1   | no blast match                          |                  |        | 0        |
| CV285216.1   | no blast match                          |                  |        | 0        |
| CV285237.1   | no blast match                          |                  |        | 0        |
| CV285240.1   | no blast match                          |                  |        | 0        |
| CV285249.1   | no blast match                          |                  |        | 0        |
| CV285253.1   | no blast match                          |                  |        | 0        |
| CV285354.1   | no blast match                          |                  |        | 0        |
| CV285358.1   | no blast match                          |                  |        | 0        |
| CV285375.1   | no blast match                          |                  |        | 0        |
| CV285401.1   | no blast match                          |                  |        | 0        |
| CV285404.1   | no blast match                          |                  |        | 0        |

Table S3  
KIEL 6 library

|              |                                                                     |            |           |    |
|--------------|---------------------------------------------------------------------|------------|-----------|----|
| CV285426.1   | no blast match                                                      |            |           | 0  |
| CV285442.1   | no blast match                                                      |            |           | 0  |
| CV285449.1   | no blast match                                                      |            |           | 0  |
| CV285451.1   | no blast match                                                      |            |           | 0  |
| CV285468.1   | no blast match                                                      |            |           | 0  |
| CV285528.1   | no blast match                                                      |            |           | 0  |
| CV285529.1   | no blast match                                                      |            |           | 0  |
| CV285537.1   | no blast match                                                      |            |           | 0  |
| CV285581.1   | no blast match                                                      |            |           | 0  |
| CV285601.1   | no blast match                                                      |            |           | 0  |
| CV285654.1   | no blast match                                                      |            |           | 0  |
| CV285673.1   | no blast match                                                      |            |           | 0  |
| CV285714.1   | no blast match                                                      |            |           | 0  |
| CV285485.1   | GB CN772184.1 CN772184 tad80g01.x1 Hydra EST Darmstadt I Hydra m... | CN772184.1 | 1,00E-28  | 80 |
| CL16CONTIG1  | GB CN628929.1 CN628929 taf46h12.x1 Hydra EST Darmstadt I Hydra m... | CN628929.1 | 7,00E-34  | 81 |
| CL101CONTIG1 | GB DT617998.1 DT617998 ACAH-aaa33b03.g1 Hydra_EST_UCI-10 Hydra m... | DT617998.1 | 2,00E-28  | 81 |
| CL147CONTIG1 | GB CN768700.1 CN768700 taf18c02.x1 Hydra EST Darmstadt I Hydra m... | CN768700.1 | 3,00E-14  | 81 |
| CL149CONTIG1 | GB BP505420.1 BP505420 BP505420 Hydra magnipapillata cDNA librar... | BP505420.1 | 3,00E-18  | 81 |
| CV285202.1   | GB CD266159.1 CD266159 tab14b07.x1 Hydra EST -III Hydra magnipap... | CD266159.1 | 1,00E-24  | 81 |
| CL57CONTIG1  | GB DN137229.2 DN137229 ACAE-aaa06k17.b3 Hydra EST UCI 5 Hydra ma... | DN137229.2 | 3,00E-36  | 82 |
| CL162CONTIG1 | GB BP522756.1 BP522756 BP522756 Hydra magnipapillata cDNA librar... | BP522756.1 | 3,00E-21  | 82 |
| CV284344.1   | GB CD268186.1 CD268186 tab76g06.x1 Hydra EST -III Hydra magnipap... | CD268186.1 | 4,00E-25  | 82 |
| CV285106.1   | GB CO374774.1 CO374774 tah19a04.y2 Hydra EST -Kiel 5 Hydra magni... | CO374774.1 | 4,00E-44  | 82 |
| CV285472.1   | GB CN560028.1 CN560028 tag35b08.y1 Hydra EST -Kiel 2 Hydra magni... | CN560028.1 | 2,00E-26  | 82 |
| CL20CONTIG1  | GB CV042373.1 CV042373 tai55c03.y2 Hydra EST UCI 5 ALP Hydra mag... | CV042373.1 | 2,00E-23  | 83 |
| CL25CONTIG2  | GB BP518180.1 BP518180 BP518180 Hydra magnipapillata cDNA librar... | BP518180.1 | 4,00E-39  | 83 |
| CL129CONTIG1 | GB CN551817.1 CN551817 tad78g02.x2 Hydra EST Darmstadt I Hydra m... | CN551817.1 | 2,00E-46  | 83 |
| CL210CONTIG1 | GB CB935670.1 CB935670 tab94d08.x1 Hydra EST -III Hydra magnipap... | CB935670.1 | 3,00E-38  | 83 |
| CV284362.1   | GB DN243642.2 DN243642 ACAE-aaa46e05.b1 Hydra EST UCI 5 Hydra ma... | DN243642.2 | 5,00E-59  | 83 |
| CV284600.1   | GB DN814925.2 DN814925 ACAC-aac44f16.g1 Hydra EST UCI 7 Hydra ma... | DN814925.2 | 2,00E-19  | 83 |
| CV285054.1   | GB BP507210.1 BP507210 BP507210 Hydra magnipapillata cDNA librar... | BP507210.1 | 6,00E-55  | 83 |
| CV285458.1   | GB CN625099.1 CN625099 tae66a02.y1 Hydra EST Darmstadt I Hydra m... | CN625099.1 | 1,00E-15  | 83 |
| CL25CONTIG1  | GB BP518180.1 BP518180 BP518180 Hydra magnipapillata cDNA librar... | BP518180.1 | 2,00E-26  | 84 |
| CL30CONTIG1  | GB CV223226.1 CV223226 taj59b11.y1 Hydra EST UCI 6 Hydra magnipa... | CV223226.1 | 2,00E-36  | 84 |
| CL31CONTIG1  | GB BP505951.1 BP505951 BP505951 Hydra magnipapillata cDNA librar... | BP505951.1 | 2,00E-51  | 84 |
| CL70CONTIG1  | GB DT616761.1 DT616761 ACAH-aaa90b08.g1 Hydra_EST_UCI-10 Hydra m... | DT616761.1 | 2,00E-32  | 84 |
| CL102CONTIG1 | GB CD566381.1 CD566381 tac04f05.x1 Hydra EST -III Hydra magnipap... | CD566381.1 | 5,00E-16  | 84 |
| CL124CONTIG1 | GB CN628043.1 CN628043 tae87d09.y1 Hydra EST Darmstadt I Hydra m... | CN628043.1 | 3,00E-23  | 84 |
| CL187CONTIG1 | GB CF778597.1 CF778597 tad19h03.x1 Hydra EST -IV Hydra magnipapi... | CF778597.1 | 4,00E-43  | 84 |
| CL213CONTIG1 | GB CN631613.1 CN631613 taf42c02.y1 Hydra EST Darmstadt I Hydra m... | CN631613.1 | 2,00E-37  | 84 |
| CL217CONTIG1 | GB CN774468.1 CN774468 tae81f08.x1 Hydra EST Darmstadt I Hydra m... | CN774468.1 | 1,00E-16  | 84 |
| CV284397.1   | GB DT617287.1 DT617287 ACAH-aaa48g12.g1 Hydra_EST_UCI-10 Hydra m... | DT617287.1 | 6,00E-77  | 84 |
| CV284607.1   | GB CO376392.1 CO376392 tah34d11.y1 Hydra EST -Kiel 5 Hydra magni... | CO376392.1 | 4,00E-40  | 84 |
| CV285200.1   | GB CB889894.1 CB889894 taa62h04.x1 Hydra EST -III Hydra magnipap... | CB889894.1 | 1,00E-11  | 84 |
| CL18CONTIG1  | GB CN552883.1 CN552883 tae41f09.y1 Hydra EST Darmstadt I Hydra m... | CN552883.1 | 4,00E-84  | 85 |
| CL188CONTIG2 | GB CN552883.1 CN552883 tae41f09.y1 Hydra EST Darmstadt I Hydra m... | CN552883.1 | 2,00E-12  | 85 |
| CL22CONTIG1  | GB CB888887.1 CB888887 taa43b09.x3 Hydra EST -III Hydra magnipap... | CB888887.1 | 4,00E-29  | 85 |
| CL42CONTIG1  | GB CB888788.1 CB888788 taa41f05.x3 Hydra EST -III Hydra magnipap... | CB888788.1 | 1,00E-25  | 85 |
| CL55CONTIG1  | GB CF655458.1 CF655458 tac89f12.y1 Hydra EST -IV Hydra magnipapi... | CF655458.1 | 2,00E-15  | 85 |
| CL71CONTIG1  | GB CB271376.1 CB271376 taa22d03.x2 Hydra EST -II Hydra magnipapi... | CB271376.1 | 9,00E-35  | 85 |
| CL81CONTIG1  | GB CD285656.1 CD285656 tab26d11.x1 Hydra EST -III Hydra magnipap... | CD285656.1 | 1,00E-19  | 85 |
| CL105CONTIG1 | GB CD567489.1 CD567489 tab78c01.x1 Hydra EST -III Hydra magnipap... | CD567489.1 | 4,00E-75  | 85 |
| CL110CONTIG1 | GB CA302256.1 CA302256 taa12d01.y1 Hydra cDNA library Hydra magn... | CA302256.1 | 3,00E-67  | 85 |
| CL130CONTIG1 | GB CN633559.1 CN633559 taf12d03.y1 Hydra EST Darmstadt I Hydra m... | CN633559.1 | 4,00E-31  | 85 |
| CL142CONTIG1 | GB CO372020.1 CO372020 tah15h01.x2 Hydra EST -Kiel 5 Hydra magni... | CO372020.1 | 1,00E-124 | 85 |
| CL193CONTIG1 | GB CD268370.1 CD268370 tab83g12.x1 Hydra EST -III Hydra magnipap... | CD268370.1 | 2,00E-25  | 85 |
| CV284413.1   | GB CD267301.1 CD267301 tab71h04.x1 Hydra EST -III Hydra magnipap... | CD267301.1 | 4,00E-53  | 85 |
| CV284495.1   | GB CA301617.1 CA301617 taa05f09.y1 Hydra cDNA library Hydra magn... | CA301617.1 | 2,00E-45  | 85 |
| CV284543.1   | GB BP518093.1 BP518093 BP518093 Hydra magnipapillata cDNA librar... | BP518093.1 | 1,00E-74  | 85 |
| CV284552.1   | GB BP512568.1 BP512568 BP512568 Hydra magnipapillata cDNA librar... | BP512568.1 | 7,00E-67  | 85 |
| CV285099.1   | GB CB888772.1 CB888772 taa41d04.x3 Hydra EST -III Hydra magnipap... | CB888772.1 | 3,00E-14  | 85 |
| CV285147.1   | GB CN628311.1 CN628311 tae94e07.x1 Hydra EST Darmstadt I Hydra m... | CN628311.1 | 2,00E-36  | 85 |
| CV285179.1   | GB CB073137.1 CB073137 taa28g09.y1 Hydra EST -II Hydra magnipapi... | CB073137.1 | 3,00E-69  | 85 |
| CV285225.1   | GB BP509924.1 BP509924 BP509924 Hydra magnipapillata cDNA librar... | BP509924.1 | 2,00E-93  | 85 |
| CV285255.1   | GB BP514276.1 BP514276 BP514276 Hydra magnipapillata cDNA librar... | BP514276.1 | 2,00E-36  | 85 |
| CV285344.1   | GB CX054754.1 CX054754 taj05e02.x2 Hydra EST UCI 5 ALP Hydra mag... | CX054754.1 | 9,00E-68  | 85 |
| CV285416.1   | GB BP517561.1 BP517561 BP517561 Hydra magnipapillata cDNA librar... | BP517561.1 | 7,00E-67  | 85 |
| CV285448.1   | GB DT607170.1 DT607170 ACAG-aaa53h04.g1 Hydra_EST_UCI-9 Hydra ma... | DT607170.1 | 3,00E-98  | 85 |
| CV285636.1   | GB BP510951.1 BP510951 BP510951 Hydra magnipapillata cDNA librar... | BP510951.1 | 5,00E-26  | 85 |
| CL59CONTIG1  | GB CN552569.1 CN552569 tae20h09.y1 Hydra EST Darmstadt I Hydra m... | CN552569.1 | 1,00E-77  | 86 |
| CL62CONTIG1  | GB CN552014.1 CN552014 tae18d06.x1 Hydra EST Darmstadt I Hydra m... | CN552014.1 | 3,00E-54  | 86 |
| CL67CONTIG1  | GB CF653876.1 CF653876 tac77e07.y1 Hydra EST -IV Hydra magnipapi... | CF653876.1 | 1,00E-36  | 86 |
| CL116CONTIG1 | GB BP507389.1 BP507389 BP507389 Hydra magnipapillata cDNA librar... | BP507389.1 | 1,00E-84  | 86 |
| CL133CONTIG1 | GB CA301714.1 CA301714 taa07a10.y1 Hydra cDNA library Hydra magn... | CA301714.1 | 8,00E-33  | 86 |
| CL135CONTIG1 | GB BP522679.1 BP522679 BP522679 Hydra magnipapillata cDNA librar... | BP522679.1 | 3,00E-21  | 86 |
| CL178CONTIG1 | GB CD567717.1 CD567717 tab81c08.x1 Hydra EST -III Hydra magnipap... | CD567717.1 | 6,00E-34  | 86 |
| CV284326.1   | GB CX833966.2 CX833966 ACAC-aaa64g06.g1 Hydra EST UCI 7 Hydra ma... | CX833966.2 | 1,00E-87  | 86 |
| CV284349.1   | GB CB271348.1 CB271348 taa21g08.x2 Hydra EST -II Hydra magnipapi... | CB271348.1 | 1,00E-112 | 86 |
| CV284427.1   | GB DN244722.2 DN244722 ACAE-aaa46m03.b1 Hydra EST UCI 5 Hydra ma... | DN244722.2 | 1,00E-31  | 86 |
| CV284512.1   | GB CV863275.2 CV863275 ACAB-aaa09c07.g1 Hydra UCI6- barcoded EST... | CV863275.2 | 8,00E-70  | 86 |
| CV284532.1   | GB CN552516.1 CN552516 tae20c11.y1 Hydra EST Darmstadt I Hydra m... | CN552516.1 | 9,00E-63  | 86 |
| CV284599.1   | GB CN561990.1 CN561990 tag27g01.x1 Hydra EST -Kiel 2 Hydra magni... | CN561990.1 | 6,00E-64  | 86 |
| CV285057.1   | GB DN242121.2 DN242121 ACAD-aaa14c16.g1 Hydra_EST_UCI-8 Hydra ma... | DN242121.2 | 4,00E-65  | 86 |

Table S3  
KIEL 6 library

|              |                                                                     |            |           |    |
|--------------|---------------------------------------------------------------------|------------|-----------|----|
| CV285094.1   | GB BP505262.1 BP505262 BP505262 Hydra magnipapillata cDNA libr...   | BP505262.1 | 3,00E-69  | 86 |
| CV285126.1   | GB CN551939.1 CN551939 tae17e08.x1 Hydra EST Darmstadt I Hydra m... | CN551939.1 | 3,00E-70  | 86 |
| CV285138.1   | GB CB888510.1 CB888510 taa77e06.x1 Hydra EST -III Hydra magnipap... | CB888510.1 | 5,00E-44  | 86 |
| CV285165.1   | GB BP504763.1 BP504763 BP504763 Hydra magnipapillata cDNA libr...   | BP504763.1 | 3,00E-21  | 86 |
| CV285213.1   | GB CV184773.1 CV184773 taj06b02.y1 Hydra EST UCI 5 ALP Hydra mag... | CV184773.1 | 3,00E-63  | 86 |
| CV285222.1   | GB CA302368.1 CA302368 taa14a11.y1 Hydra cDNA library Hydra magn... | CA302368.1 | 2,00E-64  | 86 |
| CV285411.1   | GB CB889053.1 CB889053 taa45e11.x1 Hydra EST -III Hydra magnipap... | CB889053.1 | 2,00E-54  | 86 |
| CV285632.1   | GB DR435210.1 DR435210 ACAB-aaa27a08.g1 Hydra UCI6- barcoded EST... | DR435210.1 | 4,00E-22  | 86 |
| CL5CONTIG1   | GB CN623264.1 CN623264 tae08h09.x1 Hydra EST Darmstadt I Hydra m... | CN623264.1 | 1,00E-28  | 87 |
| CL26CONTIG1  | GB CA302757.1 CA302757 taa01c04.x1 Hydra cDNA library Hydra magn... | CA302757.1 | 1,00E-111 | 87 |
| CL27CONTIG1  | GB BP511210.1 BP511210 BP511210 Hydra magnipapillata cDNA libr...   | BP511210.1 | 2,00E-64  | 87 |
| CL28CONTIG1  | GB CF656681.1 CF656681 tac67b05.x1 Hydra EST -IV Hydra magnipapi... | CF656681.1 | 2,00E-89  | 87 |
| CL82CONTIG1  | GB BP509924.1 BP509924 BP509924 Hydra magnipapillata cDNA libr...   | BP509924.1 | 2,00E-43  | 87 |
| CL86CONTIG1  | GB CV863794.2 CV863794 ACAB-aaa12d05.g1 Hydra UCI6- barcoded EST... | CV863794.2 | 1,00E-48  | 87 |
| CL90CONTIG1  | GB CX834146.2 CX834146 ACAC-aaa77f03.g1 Hydra EST UCI 7 Hydra ma... | CX834146.2 | 6,00E-39  | 87 |
| CL108CONTIG1 | GB DN636637.2 DN636637 ACAC-aab47n19.g1 Hydra EST UCI 7 Hydra ma... | DN636637.2 | 3,00E-88  | 87 |
| CL140CONTIG1 | GB CB888945.1 CB888945 taa44a07.x3 Hydra EST -III Hydra magnipap... | CB888945.1 | 9,00E-66  | 87 |
| CL145CONTIG1 | GB CA302180.1 CA302180 taa11c04.y1 Hydra cDNA library Hydra magn... | CA302180.1 | 9,00E-40  | 87 |
| CL169CONTIG1 | GB BP515977.1 BP515977 BP515977 Hydra magnipapillata cDNA libr...   | BP515977.1 | 4,00E-42  | 87 |
| CL180CONTIG1 | GB CN772532.1 CN772532 tad82h02.y1 Hydra EST Darmstadt I Hydra m... | CN772532.1 | 2,00E-73  | 87 |
| CL182CONTIG1 | GB CD567323.1 CD567323 tab51c12.x1 Hydra EST -III Hydra magnipap... | CD567323.1 | 4,00E-28  | 87 |
| CL189CONTIG1 | GB CB887977.1 CB887977 taa85e09.x1 Hydra EST -III Hydra magnipap... | CB887977.1 | 8,00E-52  | 87 |
| CL201CONTIG1 | GB DR435252.1 DR435252 ACAB-aaa27e08.g1 Hydra UCI6- barcoded EST... | DR435252.1 | 1,00E-106 | 87 |
| CL204CONTIG1 | GB CO374411.1 CO374411 tah16c05.x2 Hydra EST -Kiel 5 Hydra magni... | CO374411.1 | 3,00E-81  | 87 |
| CL218CONTIG1 | GB DN137134.2 DN137134 ACAB-aaa81n04.g1 Hydra UCI6- barcoded EST... | DN137134.2 | 2,00E-64  | 87 |
| CL229CONTIG1 | GB DN138057.2 DN138057 ACAC-aaa12d01.b3 Hydra EST UCI 5 Hydra ma... | DN138057.2 | 3,00E-38  | 87 |
| CL233CONTIG1 | GB CX771156.2 CX771156 ACAD-aab35j07.b1 Hydra_EST_UCI-8 Hydra ma... | CX771156.2 | 9,00E-47  | 87 |
| CV284408.1   | GB BP516354.1 BP516354 tae98a10.x1 Hydra EST Darmstadt I Hydra m... | CN626380.1 | 1,00E-37  | 87 |
| CV284455.1   | GB CA302201.1 CA302201 taa11e05.y1 Hydra cDNA library Hydra magn... | CA302201.1 | 7,00E-73  | 87 |
| CV284548.1   | GB CN552370.1 CN552370 tae18f04.y1 Hydra EST Darmstadt I Hydra m... | CN552370.1 | 1,00E-106 | 87 |
| CV285129.1   | GB CB889628.1 CB889628 taa39b06.x3 Hydra EST -III Hydra magnipap... | CB889628.1 | 1,00E-55  | 87 |
| CV285148.1   | GB CN556658.1 CN556658 tae39d12.x1 Hydra EST Darmstadt I Hydra m... | CN556658.1 | 2,00E-28  | 87 |
| CV285229.1   | GB CV514446.1 CV514446 taj61b03.x2 Hydra EST UCI 6 Hydra magnipa... | CV514446.1 | 2,00E-48  | 87 |
| CV285463.1   | GB BP506085.1 BP506085 BP506085 Hydra magnipapillata cDNA libr...   | BP506085.1 | 1,00E-33  | 87 |
| CV285551.1   | GB BP518451.1 BP518451 BP518451 Hydra magnipapillata cDNA libr...   | BP518451.1 | 7,00E-11  | 87 |
| CV285642.1   | GB CF656881.1 CF656881 tac69h10.x1 Hydra EST -IV Hydra magnipapi... | CF656881.1 | 1,00E-143 | 87 |
| CL4CONTIG1   | GB BP509943.1 BP509943 BP509943 Hydra magnipapillata cDNA libr...   | BP509943.1 | 3,00E-47  | 88 |
| CL13CONTIG1  | GB BP514687.1 BP514687 BP514687 Hydra magnipapillata cDNA libr...   | BP514687.1 | 4,00E-67  | 88 |
| CL21CONTIG1  | GB CB073911.1 CB073911 taa21h09.y1 Hydra EST -II Hydra magnipapi... | CB073911.1 | 7,00E-76  | 88 |
| CL38CONTIG1  | GB BP505453.1 BP505453 BP505453 Hydra magnipapillata cDNA libr...   | BP505453.1 | 1,00E-115 | 88 |
| CL65CONTIG1  | GB CB889122.1 CB889122 taa46f09.x1 Hydra EST -III Hydra magnipap... | CB889122.1 | 2,00E-54  | 88 |
| CL75CONTIG1  | GB CF601357.1 CF601357 tac36c08.y1 Hydra EST -IV Hydra magnipapi... | CF601357.1 | 4,00E-58  | 88 |
| CL91CONTIG1  | GB DT610598.1 DT610598 ACAG-aab13d12.g1 Hydra_EST_UCI-9 Hydra ma... | DT610598.1 | 2,00E-72  | 88 |
| CL104CONTIG1 | GB DN813419.2 DN813419 ACAC-aac49c09.g1 Hydra EST UCI 7 Hydra ma... | DN813419.2 | 1,00E-103 | 88 |
| CL113CONTIG1 | GB CF674092.1 CF674092 tad01h11.x1 Hydra EST -IV Hydra magnipapi... | CF674092.1 | 8,00E-41  | 88 |
| CL123CONTIG1 | GB BP516354.1 BP516354 BP516354 Hydra magnipapillata cDNA libr...   | BP516354.1 | 1,00E-165 | 88 |
| CL125CONTIG1 | GB CN554301.1 CN554301 tae35d05.y1 Hydra EST Darmstadt I Hydra m... | CN554301.1 | 6,00E-33  | 88 |
| CL126CONTIG1 | GB CA301791.1 CA301791 taa08b03.y1 Hydra cDNA library Hydra magn... | CA301791.1 | 2,00E-42  | 88 |
| CL127CONTIG1 | GB BP506640.1 BP506640 BP506640 Hydra magnipapillata cDNA libr...   | BP506640.1 | 2,00E-70  | 88 |
| CL172CONTIG1 | GB CN551870.1 CN551870 tad79f09.x2 Hydra EST Darmstadt I Hydra m... | CN551870.1 | 1,00E-86  | 88 |
| CL185CONTIG1 | GB CA303257.1 CA303257 taa05g04.x1 Hydra cDNA library Hydra magn... | CA303257.1 | 2,00E-54  | 88 |
| CL188CONTIG1 | GB CD266535.1 CD266535 tab19g05.x1 Hydra EST -III Hydra magnipap... | CD266535.1 | 1,00E-55  | 88 |
| CL207CONTIG1 | GB CF674033.1 CF674033 tad01a06.x1 Hydra EST -IV Hydra magnipapi... | CF674033.1 | 6,00E-13  | 88 |
| CL231CONTIG1 | GB CB073712.1 CB073712 taa20c08.y1 Hydra EST -II Hydra magnipapi... | CB073712.1 | 1,00E-15  | 88 |
| CL232CONTIG1 | GB CN624739.1 CN624739 tae65d12.x1 Hydra EST Darmstadt I Hydra m... | CN624739.1 | 1,00E-42  | 88 |
| CL237CONTIG1 | GB CB272074.1 CB272074 taa30e07.x2 Hydra EST -II Hydra magnipapi... | CB272074.1 | 1,00E-21  | 88 |
| CL239CONTIG1 | GB CN774472.1 CN774472 tae81g01.x1 Hydra EST Darmstadt I Hydra m... | CN774472.1 | 3,00E-23  | 88 |
| CV284394.1   | GB CD567720.1 CD567720 tab81c11.x1 Hydra EST -III Hydra magnipap... | CD567720.1 | 4,00E-81  | 88 |
| CV284409.1   | GB CB888612.1 CB888612 taa79a10.x1 Hydra EST -III Hydra magnipap... | CB888612.1 | 6,00E-55  | 88 |
| CV284438.1   | GB CF653876.1 CF653876 tac77e07.y1 Hydra EST -IV Hydra magnipapi... | CF653876.1 | 1,00E-77  | 88 |
| CV284480.1   | GB CF778958.1 CF778958 tad24h07.x1 Hydra EST -IV Hydra magnipapi... | CF778958.1 | 7,00E-42  | 88 |
| CV284585.1   | GB CF654579.1 CF654579 tac83d09.y1 Hydra EST -IV Hydra magnipapi... | CF654579.1 | 1,00E-165 | 88 |
| CV285078.1   | GB CA302244.1 CA302244 taa12b06.y1 Hydra cDNA library Hydra magn... | CA302244.1 | 4,00E-17  | 88 |
| CV285108.1   | GB CN552933.1 CN552933 tae42c02.y1 Hydra EST Darmstadt I Hydra m... | CN552933.1 | 1,00E-105 | 88 |
| CV285137.1   | GB BP504854.1 BP504854 BP504854 Hydra magnipapillata cDNA libr...   | BP504854.1 | 1,00E-133 | 88 |
| CV285309.1   | GB CO537847.1 CO537847 tah79d03.y1 Hydra EST UCI 5 Hydra magnipa... | CO537847.1 | 1,00E-74  | 88 |
| CV285348.1   | GB CN552100.1 CN552100 tae19d10.x1 Hydra EST Darmstadt I Hydra m... | CN552100.1 | 1,00E-32  | 88 |
| CV285701.1   | GB CO374929.1 CO374929 tah25c05.x1 Hydra EST -Kiel 5 Hydra magni... | CO374929.1 | 2,00E-20  | 88 |
| CL19CONTIG1  | GB CN625966.1 CN625966 tae53c12.y1 Hydra EST Darmstadt I Hydra m... | CN625966.1 | 4,00E-77  | 89 |
| CL35CONTIG1  | GB CD268002.1 CD268002 tab13f10.x1 Hydra EST -III Hydra magnipap... | CD268002.1 | 7,00E-60  | 89 |
| CL63CONTIG1  | GB CB889756.1 CB889756 taa40h03.x3 Hydra EST -III Hydra magnipap... | CB889756.1 | 1,00E-36  | 89 |
| CL64CONTIG1  | GB CA302441.1 CA302441 taa15a10.y1 Hydra cDNA library Hydra magn... | CA302441.1 | 2,00E-69  | 89 |
| CL96CONTIG1  | GB BP508041.1 BP508041 BP508041 Hydra magnipapillata cDNA libr...   | BP508041.1 | 1,00E-115 | 89 |
| CL99CONTIG1  | GB CO371949.1 CO371949 tah14g10.x2 Hydra EST -Kiel 5 Hydra magni... | CO371949.1 | 1,00E-138 | 89 |
| CL131CONTIG1 | GB CN628840.1 CN628840 tae96f11.y1 Hydra EST Darmstadt I Hydra m... | CN628840.1 | 1,00E-174 | 89 |
| CL138CONTIG1 | GB CX832420.2 CX832420 ACAC-aaa35f03.g1 Hydra EST UCI 7 Hydra ma... | CX832420.2 | 6,00E-51  | 89 |
| CL144CONTIG1 | GB CA302769.1 CA302769 taa01e03.x1 Hydra cDNA library Hydra magn... | CA302769.1 | 1,00E-133 | 89 |
| CL151CONTIG1 | GB BP506847.1 BP506847 BP506847 Hydra magnipapillata cDNA libr...   | BP506847.1 | 3,00E-43  | 89 |
| CL153CONTIG1 | GB BP508518.1 BP508518 BP508518 Hydra magnipapillata cDNA libr...   | BP508518.1 | 4,00E-69  | 89 |
| CL154CONTIG1 | GB CN772339.1 CN772339 tad80c06.y1 Hydra EST Darmstadt I Hydra m... | CN772339.1 | 4,00E-99  | 89 |
| CL203CONTIG1 | GB CA302481.1 CA302481 taa15f07.y1 Hydra cDNA library Hydra magn... | CA302481.1 | 4,00E-97  | 89 |
| CL219CONTIG1 | GB CF653876.1 CF653876 tac77e07.y1 Hydra EST -IV Hydra magnipapi... | CF653876.1 | 1,00E-70  | 89 |
| CL238CONTIG1 | GB CN551548.1 CN551548 tad74c11.x2 Hydra EST Darmstadt I Hydra m... | CN551548.1 | 2,00E-32  | 89 |

Table S3  
KIEL 6 library

|              |                                                                     |            |           |    |
|--------------|---------------------------------------------------------------------|------------|-----------|----|
| CV284329.1   | GB CO537307.1 CO537307 tah69e11.x1 Hydra EST UCI 5 Hydra magnipa... | CO537307.1 | 2,00E-40  | 89 |
| CV284347.1   | GB DN811598.2 DN811598 ACAC-aab42g04.g1 Hydra EST UCI 7 Hydra ma... | DN811598.2 | 1,00E-101 | 89 |
| CV284358.1   | GB CD268647.1 CD268647 taa98a07.x1 Hydra EST -III Hydra magnipap... | CD268647.1 | 1,00E-77  | 89 |
| CV284360.1   | GB BP519387.1 BP519387 BP519387 Hydra magnipapillata cDNA libr...   | BP519387.1 | 2,00E-98  | 89 |
| CV284414.1   | GB CB271664.1 CB271664 taa20b01.x2 Hydra EST -II Hydra magnipapi... | CB271664.1 | 1,00E-119 | 89 |
| CV284474.1   | GB CB888747.1 CB888747 taa41a08.x3 Hydra EST -III Hydra magnipap... | CB888747.1 | 6,00E-45  | 89 |
| CV284502.1   | GB CB073950.1 CB073950 taa22e10.y1 Hydra EST -II Hydra magnipapi... | CB073950.1 | 4,00E-38  | 89 |
| CV284508.1   | GB CO745725.1 CO745725 tah87h10.x1 Hydra EST UCI 5 Hydra magnipa... | CO745725.1 | 1,00E-104 | 89 |
| CV284521.1   | GB CF657943.1 CF657943 tac78b08.x1 Hydra EST -IV Hydra magnipapi... | CF657943.1 | 9,00E-51  | 89 |
| CV284553.1   | GB CD680270.1 CD680270 tac20a08.y1 Hydra EST -IV Hydra magnipapi... | CD680270.1 | 4,00E-78  | 89 |
| CV285111.1   | GB CN626657.1 CN626657 tae98b05.y1 Hydra EST Darmstadt I Hydra m... | CN626657.1 | 6,00E-59  | 89 |
| CV285146.1   | GB CN559738.1 CN559738 tag30h08.y1 Hydra EST -Kiel 2 Hydra magni... | CN559738.1 | 4,00E-39  | 89 |
| CV285239.1   | GB CB888710.1 CB888710 taa80e07.x1 Hydra EST -III Hydra magnipap... | CB888710.1 | 2,00E-85  | 89 |
| CV285268.1   | GB CF654214.1 CF654214 tac82a01.x1 Hydra EST -IV Hydra magnipapi... | CF654214.1 | 1,00E-123 | 89 |
| CV285313.1   | GB CA302984.1 CA302984 taa01f02.y1 Hydra cDNA library Hydra magn... | CA302984.1 | 4,00E-87  | 89 |
| CV285486.1   | GB CA302981.1 CA302981 taa01e11.y1 Hydra cDNA library Hydra magn... | CA302981.1 | 1,00E-104 | 89 |
| CV285522.1   | GB CB888652.1 CB888652 taa79f11.x1 Hydra EST -III Hydra magnipap... | CB888652.1 | 1,00E-54  | 89 |
| CV285629.1   | GB DN603585.2 DN603585 ACAC-aac12p24.g1 Hydra EST UCI 7 Hydra ma... | DN603585.2 | 1,00E-79  | 89 |
| CV285644.1   | GB CN551380.1 CN551380 tad72a06.x2 Hydra EST Darmstadt I Hydra m... | CN551380.1 | 8,00E-13  | 89 |
| CV285713.1   | GB CF655237.1 CF655237 tac86g03.y1 Hydra EST -IV Hydra magnipapi... | CF655237.1 | 2,00E-88  | 89 |
| CL8CONTIG1   | GB CA301602.1 CA301602 taa05e01.y1 Hydra cDNA library Hydra magn... | CA301602.1 | 1,00E-120 | 90 |
| CL15CONTIG1  | GB CF777577.1 CF777577 tad12g02.x1 Hydra EST -IV Hydra magnipapi... | CF777577.1 | 0         | 90 |
| CL33CONTIG1  | GB CV185198.1 CV185198 taj10b03.y1 Hydra EST UCI 5 ALP Hydra mag... | CV185198.1 | 0         | 90 |
| CL36CONTIG1  | GB CA302368.1 CA302368 taa14a11.y1 Hydra cDNA library Hydra magn... | CA302368.1 | 1,00E-100 | 90 |
| CL43CONTIG1  | GB CA303111.1 CA303111 taa03d01.y1 Hydra cDNA library Hydra magn... | CA303111.1 | 1,00E-139 | 90 |
| CL48CONTIG1  | GB CN631025.1 CN631025 taf50e07.y1 Hydra EST Darmstadt I Hydra m... | CN631025.1 | 3,00E-54  | 90 |
| CL61CONTIG1  | GB BP516406.1 BP516406 BP516406 Hydra magnipapillata cDNA libr...   | BP516406.1 | 3,00E-81  | 90 |
| CL72CONTIG1  | GB CA301700.1 CA301700 taa06h02.y1 Hydra cDNA library Hydra magn... | CA301700.1 | 1,00E-99  | 90 |
| CL83CONTIG1  | GB CV463900.1 CV463900 taj32g02.y1 Hydra EST UCI 5 ALP Hydra mag... | CV463900.1 | 4,00E-77  | 90 |
| CL84CONTIG1  | GB CN552824.1 CN552824 tae41a05.y1 Hydra EST Darmstadt I Hydra m... | CN552824.1 | 1,00E-108 | 90 |
| CL97CONTIG1  | GB CD285672.1 CD285672 tab26f09.x1 Hydra EST -III Hydra magnipap... | CD285672.1 | 1,00E-121 | 90 |
| CL103CONTIG1 | GB CN623355.1 CN623355 tae06a07.y1 Hydra EST Darmstadt I Hydra m... | CN623355.1 | 2,00E-12  | 90 |
| CL111CONTIG1 | GB CD268634.1 CD268634 taa96h05.x1 Hydra EST -III Hydra magnipap... | CD268634.1 | 1,00E-149 | 90 |
| CL134CONTIG1 | GB CA302600.1 CA302600 taa13e05.x1 Hydra cDNA library Hydra magn... | CA302600.1 | 1,00E-115 | 90 |
| CL139CONTIG1 | GB DN602704.2 DN602704 ACAB-aab00b07.g1 Hydra UCI6- barcoded EST... | DN602704.2 | 1,00E-168 | 90 |
| CL161CONTIG1 | GB DN604257.2 DN604257 ACAC-aab80n10.g1 Hydra EST UCI 7 Hydra ma... | DN604257.2 | 0         | 90 |
| CL166CONTIG1 | GB CA301640.1 CA301640 taa06a10.y1 Hydra cDNA library Hydra magn... | CA301640.1 | 1,00E-41  | 90 |
| CL176CONTIG1 | GB CB073034.1 CB073034 taa27c06.y1 Hydra EST -II Hydra magnipapi... | CB073034.1 | 6,00E-54  | 90 |
| CL173CONTIG1 | GB BP512038.1 BP512038 BP512038 Hydra magnipapillata cDNA libr...   | BP512038.1 | 2,00E-27  | 90 |
| CL176CONTIG1 | GB CD606933.1 CD606933 tac22c05.x1 Hydra EST -IV Hydra magnipapi... | CD606933.1 | 9,00E-72  | 90 |
| CL192CONTIG1 | GB CX832124.2 CX832124 ACAC-aaa49a03.g1 Hydra EST UCI 7 Hydra ma... | CX832124.2 | 1,00E-111 | 90 |
| CL197CONTIG1 | GB DR435312.1 DR435312 ACAB-aaa28e01.g1 Hydra UCI6- barcoded EST... | DR435312.1 | 9,00E-63  | 90 |
| CL200CONTIG1 | GB CV514347.1 CV514347 taj58a08.x2 Hydra EST UCI 6 Hydra magnipa... | CV514347.1 | 1,00E-123 | 90 |
| CL214CONTIG1 | GB CN774120.1 CN774120 taf58e03.y2 Hydra EST Darmstadt I Hydra m... | CN774120.1 | 1,00E-15  | 90 |
| CV284342.1   | GB CX832269.2 CX832269 ACAC-aaa17e04.g1 Hydra EST UCI 7 Hydra ma... | CX832269.2 | 7,00E-45  | 90 |
| CV284356.1   | GB CA301883.1 CA301883 taa09e11.y1 Hydra cDNA library Hydra magn... | CA301883.1 | 1,00E-117 | 90 |
| CV284370.1   | GB CN552624.1 CN552624 tae41e10.x1 Hydra EST Darmstadt I Hydra m... | CN552624.1 | 1,00E-26  | 90 |
| CV284385.1   | GB BP508644.1 BP508644 BP508644 Hydra magnipapillata cDNA libr...   | BP508644.1 | 2,00E-47  | 90 |
| CV284396.1   | GB CA302368.1 CA302368 taa14a11.y1 Hydra cDNA library Hydra magn... | CA302368.1 | 2,00E-33  | 90 |
| CV284470.1   | GB BP510630.1 BP510630 BP510630 Hydra magnipapillata cDNA libr...   | BP510630.1 | 6,00E-73  | 90 |
| CV284488.1   | GB CV659889.1 CV659889 tak19g10.y1 Hydra EST UCI 6 Hydra magnipa... | CV659889.1 | 3,00E-60  | 90 |
| CV284597.1   | GB CV565070.1 CV565070 taj71b10.y1 Hydra EST UCI 6 Hydra magnipa... | CV565070.1 | 1,00E-43  | 90 |
| CV285092.1   | GB CN768851.1 CN768851 taf20b08.x1 Hydra EST Darmstadt I Hydra m... | CN768851.1 | 4,00E-90  | 90 |
| CV285173.1   | GB CB888492.1 CB888492 taa77c02.x1 Hydra EST -III Hydra magnipap... | CB888492.1 | 7,00E-44  | 90 |
| CV285187.1   | GB CN630900.1 CN630900 taf53a02.x1 Hydra EST Darmstadt I Hydra m... | CN630900.1 | 2,00E-26  | 90 |
| CV285242.1   | GB BP508809.1 BP508809 BP508809 Hydra magnipapillata cDNA libr...   | BP508809.1 | 1,00E-74  | 90 |
| CV285419.1   | GB CF657773.1 CF657773 tac75f06.x1 Hydra EST -IV Hydra magnipapi... | CF657773.1 | 2,00E-57  | 90 |
| CV285462.1   | GB CN558940.1 CN558940 tad77h06.y1 Hydra EST Darmstadt I Hydra m... | CN558940.1 | 1,00E-131 | 90 |
| CV285523.1   | GB CB271959.1 CB271959 taa28f09.x3 Hydra EST -II Hydra magnipapi... | CB271959.1 | 6,00E-70  | 90 |
| CV285594.1   | GB CN632490.1 CN632490 taf02c09.x1 Hydra EST Darmstadt I Hydra m... | CN632490.1 | 0         | 90 |
| CV285653.1   | GB CF655927.1 CF655927 tac49d11.y1 Hydra EST -IV Hydra magnipapi... | CF655927.1 | 1,00E-154 | 90 |
| CV285684.1   | GB BP517656.1 BP517656 BP517656 Hydra magnipapillata cDNA libr...   | BP517656.1 | 1,00E-142 | 90 |
| CL1CONTIG1   | GB CD266973.1 CD266973 tab06e10.x1 Hydra EST -III Hydra magnipap... | CD266973.1 | 1,00E-172 | 91 |
| CL2CONTIG1   | GB CN622838.1 CN622838 tad96c06.x1 Hydra EST Darmstadt I Hydra m... | CN622838.1 | 2,00E-46  | 91 |
| CL37CONTIG1  | GB DT617203.1 DT617203 ACAH-aaa47e03.g1 Hydra_EST_UCI-10 Hydra m... | DT617203.1 | 1,00E-95  | 91 |
| CL52CONTIG1  | GB CB073034.1 CB073034 taa27c06.y1 Hydra EST -II Hydra magnipapi... | CB073034.1 | 6,00E-73  | 91 |
| CL54CONTIG1  | GB CD567616.1 CD567616 tab79h05.x1 Hydra EST -III Hydra magnipap... | CD567616.1 | 1,00E-148 | 91 |
| CL89CONTIG1  | GB CB888636.1 CB888636 taa79d12.x1 Hydra EST -III Hydra magnipap... | CB888636.1 | 2,00E-80  | 91 |
| CL119CONTIG1 | GB CN553590.1 CN553590 tae26d09.y1 Hydra EST Darmstadt I Hydra m... | CN553590.1 | 1,00E-62  | 91 |
| CL121CONTIG1 | GB BP510682.1 BP510682 BP510682 Hydra magnipapillata cDNA libr...   | BP510682.1 | 1,00E-131 | 91 |
| CL156CONTIG1 | GB CV181119.1 CV181119 tai73c08.x1 Hydra EST UCI 5 ALP Hydra mag... | CV181119.1 | 0         | 91 |
| CL215CONTIG1 | GB CB888166.1 CB888166 taa88c07.x1 Hydra EST -III Hydra magnipap... | CB888166.1 | 5,00E-52  | 91 |
| CV284316.1   | GB CN556646.1 CN556646 tae39c05.x1 Hydra EST Darmstadt I Hydra m... | CN556646.1 | 1,00E-133 | 91 |
| CV284323.1   | GB CX830338.2 CX830338 ACAC-aaa23b01.g1 Hydra EST UCI 7 Hydra ma... | CX830338.2 | 5,00E-73  | 91 |
| CV284324.1   | GB BP506492.1 BP506492 BP506492 Hydra magnipapillata cDNA libr...   | BP506492.1 | 5,00E-80  | 91 |
| CV284353.1   | GB CB889824.1 CB889824 taa61h04.x1 Hydra EST -III Hydra magnipap... | CB889824.1 | 8,00E-86  | 91 |
| CV284453.1   | GB CV184859.1 CV184859 taj07e09.y1 Hydra EST UCI 5 ALP Hydra mag... | CV184859.1 | 1,00E-176 | 91 |
| CV284464.1   | GB DN242497.2 DN242497 ACAD-aaa62o18.g1 Hydra_EST_UCI-8 Hydra ma... | DN242497.2 | 1,00E-157 | 91 |
| CV284487.1   | GB CN772064.1 CN772064 tad94h02.y1 Hydra EST Darmstadt I Hydra m... | CN772064.1 | 1,00E-101 | 91 |
| CV284523.1   | GB CN552141.1 CN552141 tae20a03.y1 Hydra EST Darmstadt I Hydra m... | CN552141.1 | 1,00E-30  | 91 |
| CV284537.1   | GB CV514820.1 CV514820 taj63h04.x2 Hydra EST UCI 6 Hydra magnipa... | CV514820.1 | 7,00E-69  | 91 |
| CV284566.1   | GB BP516806.1 BP516806 BP516806 Hydra magnipapillata cDNA libr...   | BP516806.1 | 2,00E-22  | 91 |
| CV285050.1   | GB CN777769.1 CN777769 tad84b04.y2 Hydra EST Darmstadt I Hydra m... | CN777769.1 | 1,00E-119 | 91 |

|              |                                                                     |            |           |    |
|--------------|---------------------------------------------------------------------|------------|-----------|----|
| CV285066.1   | GB DT610319.1 DT610319 ACAG-aaa49c06.g1 Hydra_EST_UCI-9 Hydra ma... | DT610319.1 | 1,00E-167 | 91 |
| CV285084.1   | GB CA302164.1 CA302164 taa11a11.y1 Hydra cDNA library Hydra magn... | CA302164.1 | 5,00E-67  | 91 |
| CV285251.1   | GB CO509638.1 CO509638 tai57b10.x1 Hydra EST UCI 5 ALP Hydra mag... | CO509638.1 | 9,00E-72  | 91 |
| CV285264.1   | GB CO374409.1 CO374409 tah16b12.x2 Hydra EST -Kiel 5 Hydra magni... | CO374409.1 | 1,00E-22  | 91 |
| CV285266.1   | GB BP518675.1 BP518675 BP518675 Hydra magnipapillata cDNA librar... | BP518675.1 | 4,00E-59  | 91 |
| CV285270.1   | GB DN245619.2 DN245619 ACAE-aaa28i03.b1 Hydra EST UCI 5 Hydra ma... | DN245619.2 | 1,00E-106 | 91 |
| CV285371.1   | GB CD566338.1 CD566338 tac04a08.x1 Hydra EST -III Hydra magnipap... | CD566338.1 | 1,00E-38  | 91 |
| CV285502.1   | GB CO376150.1 CO376150 tah35b10.x1 Hydra EST -Kiel 5 Hydra magni... | CO376150.1 | 2,00E-13  | 91 |
| CV285507.1   | GB CV514602.1 CV514602 taj67h12.y1 Hydra EST UCI 6 Hydra magnipa... | CV514602.1 | 1,00E-110 | 91 |
| CV285546.1   | GB CD680489.1 CD680489 tab54a01.x1 Hydra EST -III Hydra magnipap... | CD680489.1 | 5,00E-75  | 91 |
| CV285722.1   | GB CB272068.1 CB272068 taa30d10.x2 Hydra EST -II Hydra magnipapi... | CB272068.1 | 6,00E-73  | 91 |
| CL6CONTIG1   | GB BP509264.1 BP509264 BP509264 Hydra magnipapillata cDNA librar... | BP509264.1 | 1,00E-124 | 92 |
| CL12CONTIG1  | GB BP508959.1 BP508959 BP508959 Hydra magnipapillata cDNA librar... | BP508959.1 | 5,00E-89  | 92 |
| CL17CONTIG1  | GB CB888612.1 CB888612 taa79a10.x1 Hydra EST -III Hydra magnipap... | CB888612.1 | 1,00E-169 | 92 |
| CL24CONTIG1  | GB CN774768.1 CN774768 tae73g05.y1 Hydra EST Darmstadt I Hydra m... | CN774768.1 | 3,00E-94  | 92 |
| CL29CONTIG1  | GB CV565246.1 CV565246 taj73f04.y1 Hydra EST UCI 6 Hydra magnipa... | CV565246.1 | 3,00E-55  | 92 |
| CL45CONTIG1  | GB CB073332.1 CB073332 taa31e01.y1 Hydra EST -II Hydra magnipapi... | CB073332.1 | 1,00E-115 | 92 |
| CL53CONTIG1  | GB CN774922.1 CN774922 tae75e04.y1 Hydra EST Darmstadt I Hydra m... | CN774922.1 | 1,00E-160 | 92 |
| CL56CONTIG1  | GB CN557797.1 CN557797 tae47d09.x1 Hydra EST Darmstadt I Hydra m... | CN557797.1 | 3,00E-63  | 92 |
| CL66CONTIG1  | GB CA302647.1 CA302647 taa14f08.x1 Hydra cDNA library Hydra magn... | CA302647.1 | 6,00E-73  | 92 |
| CL73CONTIG1  | GB BP506573.1 BP506573 BP506573 Hydra magnipapillata cDNA librar... | BP506573.1 | 4,00E-77  | 92 |
| CL100CONTIG1 | GB CB888639.1 CB888639 taa79e04.x1 Hydra EST -III Hydra magnipap... | CB888639.1 | 1,00E-139 | 92 |
| CL107CONTIG1 | GB CV151480.1 CV151480 tai69h06.x2 Hydra EST UCI 5 ALP Hydra mag... | CV151480.1 | 1,00E-111 | 92 |
| CL114CONTIG1 | GB CV863817.2 CV863817 ACAB-aaa12f07.g1 Hydra UCI6- barcoded EST... | CV863817.2 | 1,00E-159 | 92 |
| CL122CONTIG1 | GB BP520757.1 BP520757 BP520757 Hydra magnipapillata cDNA librar... | BP520757.1 | 4,00E-77  | 92 |
| CL128CONTIG1 | GB CB271252.1 CB271252 taa17b12.x2 Hydra EST -II Hydra magnipapi... | CB271252.1 | 1,00E-100 | 92 |
| CL141CONTIG1 | GB CN770372.1 CN770372 tae69c08.x1 Hydra EST Darmstadt I Hydra m... | CN770372.1 | 1,00E-108 | 92 |
| CL146CONTIG1 | GB CD268504.1 CD268504 taa93g10.x1 Hydra EST -III Hydra magnipap... | CD268504.1 | 2,00E-34  | 92 |
| CL157CONTIG1 | GB CA303015.1 CA303015 taa02a04.y1 Hydra cDNA library Hydra magn... | CA303015.1 | 1,00E-136 | 92 |
| CL163CONTIG1 | GB CD681237.1 CD681237 tac23f06.y1 Hydra EST -IV Hydra magnipapi... | CD681237.1 | 1,00E-142 | 92 |
| CL165CONTIG1 | GB CV465165.1 CV465165 taj23b07.x1 Hydra EST UCI 5 ALP Hydra mag... | CV465165.1 | 0         | 92 |
| CL184CONTIG1 | GB BP515497.1 BP515497 BP515497 Hydra magnipapillata cDNA librar... | BP515497.1 | 1,00E-79  | 92 |
| CL199CONTIG1 | GB CN632535.1 CN632535 taf02h06.x1 Hydra EST Darmstadt I Hydra m... | CN632535.1 | 3,00E-62  | 92 |
| CL202CONTIG1 | GB CD266172.1 CD266172 tab14d01.x1 Hydra EST -III Hydra magnipap... | CD266172.1 | 5,00E-65  | 92 |
| CL209CONTIG1 | GB CA302543.1 CA302543 taa16e04.y1 Hydra cDNA library Hydra magn... | CA302543.1 | 1,00E-148 | 92 |
| CL220CONTIG1 | GB CN627638.1 CN627638 tae86g02.x1 Hydra EST Darmstadt I Hydra m... | CN627638.1 | 1,00E-101 | 92 |
| CL224CONTIG1 | GB CD567612.1 CD567612 tab79g12.x1 Hydra EST -III Hydra magnipap... | CD567612.1 | 1,00E-141 | 92 |
| CL226CONTIG1 | GB CB890627.1 CB890627 taa75f09.x1 Hydra EST -III Hydra magnipap... | CB890627.1 | 1,00E-120 | 92 |
| CL235CONTIG1 | GB CF654425.1 CF654425 tac81b07.y1 Hydra EST -IV Hydra magnipapi... | CF654425.1 | 1,00E-111 | 92 |
| CV284315.1   | GB BP506412.1 BP506412 BP506412 Hydra magnipapillata cDNA librar... | BP506412.1 | 1,00E-103 | 92 |
| CV284320.1   | GB CO373915.1 CO373915 tah20a02.x2 Hydra EST -Kiel 5 Hydra magni... | CO373915.1 | 3,00E-93  | 92 |
| CV284381.1   | GB DN813514.2 DN813514 ACAC-aac50k24.g1 Hydra EST UCI 7 Hydra ma... | DN813514.2 | 3,00E-89  | 92 |
| CV284417.1   | GB CA302044.1 CA302044 taa09d10.y1 Hydra cDNA library Hydra magn... | CA302044.1 | 7,00E-88  | 92 |
| CV284633.1   | GB CB072984.1 CB072984 taa26e11.y1 Hydra EST -II Hydra magnipapi... | CB072984.1 | 8,00E-21  | 92 |
| CV285067.1   | GB CO372030.1 CO372030 tah15h11.x2 Hydra EST -Kiel 5 Hydra magni... | CO372030.1 | 2,00E-17  | 92 |
| CV285131.1   | GB DT610033.1 DT610033 ACAG-aaa58h06.g1 Hydra_EST_UCI-9 Hydra ma... | DT610033.1 | 1,00E-113 | 92 |
| CV285177.1   | GB CV182751.1 CV182751 tai87h08.y1 Hydra EST UCI 5 ALP Hydra mag... | CV182751.1 | 1,00E-154 | 92 |
| CV285244.1   | GB CB073850.1 CB073850 taa21b11.y1 Hydra EST -II Hydra magnipapi... | CB073850.1 | 2,00E-55  | 92 |
| CV285254.1   | GB CD266940.1 CD266940 tab06b05.x1 Hydra EST -III Hydra magnipap... | CD266940.1 | 1,00E-57  | 92 |
| CV285257.1   | GB BP505798.1 BP505798 BP505798 Hydra magnipapillata cDNA librar... | BP505798.1 | 1,00E-135 | 92 |
| CV285466.1   | GB CV464828.1 CV464828 taj26e10.y1 Hydra EST UCI 5 ALP Hydra mag... | CV464828.1 | 0         | 92 |
| CV285628.1   | GB DN603328.2 DN603328 ACAC-aac09g21.g1 Hydra EST UCI 7 Hydra ma... | DN603328.2 | 0         | 92 |
| CV285637.1   | GB CA302590.1 CA302590 taa13c10.x1 Hydra cDNA library Hydra magn... | CA302590.1 | 1,00E-22  | 92 |
| CV285707.1   | GB DT616439.1 DT616439 ACAH-aaa14f12.g1 Hydra_EST_UCI-10 Hydra m... | DT616439.1 | 1,00E-165 | 92 |
| CL32CONTIG1  | GB CO375019.1 CO375019 tah26e08.x1 Hydra EST -Kiel 5 Hydra magni... | CO375019.1 | 1,00E-136 | 93 |
| CL39CONTIG1  | GB CV042287.1 CV042287 tai54b04.y2 Hydra EST UCI 5 ALP Hydra mag... | CV042287.1 | 0         | 93 |
| CL40CONTIG1  | GB BP508232.1 BP508232 BP508232 Hydra magnipapillata cDNA librar... | BP508232.1 | 4,00E-64  | 93 |
| CL60CONTIG1  | GB CO376584.1 CO376584 tah42b03.x1 Hydra EST -Kiel 5 Hydra magni... | CO376584.1 | 1,00E-101 | 93 |
| CL69CONTIG1  | GB CF674708.1 CF674708 tac86a05.x1 Hydra EST -IV Hydra magnipapi... | CF674708.1 | 1,00E-158 | 93 |
| CL76CONTIG1  | GB CA303219.1 CA303219 taa04g05.y1 Hydra cDNA library Hydra magn... | CA303219.1 | 2,00E-89  | 93 |
| CL85CONTIG1  | GB DT615928.1 DT615928 ACAH-aab12c07.g1 Hydra_EST_UCI-10 Hydra m... | DT615928.1 | 4,00E-86  | 93 |
| CL88CONTIG1  | GB CD606798.1 CD606798 tac20a04.x1 Hydra EST -IV Hydra magnipapi... | CD606798.1 | 1,00E-141 | 93 |
| CL92CONTIG1  | GB CB073343.1 CB073343 taa31f03.y1 Hydra EST -II Hydra magnipapi... | CB073343.1 | 1,00E-159 | 93 |
| CL115CONTIG1 | GB CA302093.1 CA302093 taa10b03.y1 Hydra cDNA library Hydra magn... | CA302093.1 | 2,00E-94  | 93 |
| CL148CONTIG1 | GB CA302115.1 CA302115 taa10d09.y1 Hydra cDNA library Hydra magn... | CA302115.1 | 8,00E-49  | 93 |
| CL160CONTIG1 | GB CN558007.1 CN558007 tae46f06.y1 Hydra EST Darmstadt I Hydra m... | CN558007.1 | 1,00E-170 | 93 |
| CL177CONTIG1 | GB BP518542.1 BP518542 BP518542 Hydra magnipapillata cDNA librar... | BP518542.1 | 1,00E-138 | 93 |
| CL194CONTIG1 | GB CB073201.1 CB073201 taa29g07.y1 Hydra EST -II Hydra magnipapi... | CB073201.1 | 1,00E-142 | 93 |
| CL208CONTIG1 | GB CD267611.1 CD267611 tab91e04.x1 Hydra EST -III Hydra magnipap... | CD267611.1 | 1,00E-68  | 93 |
| CL216CONTIG1 | GB CO537490.1 CO537490 tah77h12.x1 Hydra EST UCI 5 Hydra magnipa... | CO537490.1 | 1,00E-103 | 93 |
| CL230CONTIG1 | GB CD268917.1 CD268917 tab23a05.x1 Hydra EST -III Hydra magnipap... | CD268917.1 | 3,00E-64  | 93 |
| CL236CONTIG1 | GB DT612109.1 DT612109 ACAG-aaa73g02.g1 Hydra_EST_UCI-9 Hydra ma... | DT612109.1 | 1,00E-114 | 93 |
| CV284404.1   | GB CB073120.1 CB073120 taa28e10.y1 Hydra EST -II Hydra magnipapi... | CB073120.1 | 2,00E-69  | 93 |
| CV285082.1   | GB CA302579.1 CA302579 taa13b05.x1 Hydra cDNA library Hydra magn... | CA302579.1 | 5,00E-95  | 93 |
| CV285089.1   | GB CA301952.1 CA301952 taa11e06.x1 Hydra cDNA library Hydra magn... | CA301952.1 | 4,00E-92  | 93 |
| CV285117.1   | GB CD268910.1 CD268910 tab22h08.x1 Hydra EST -III Hydra magnipap... | CD268910.1 | 7,00E-66  | 93 |
| CV285119.1   | GB CO377730.1 CO377730 tah58c03.x1 Hydra EST -Kiel 5 Hydra magni... | CO377730.1 | 5,00E-64  | 93 |
| CV285193.1   | GB CD606832.1 CD606832 tac20f09.x1 Hydra EST -IV Hydra magnipapi... | CD606832.1 | 3,00E-11  | 93 |
| CV285378.1   | GB CA301778.1 CA301778 taa07h11.y1 Hydra cDNA library Hydra magn... | CA301778.1 | 6,00E-66  | 93 |
| CV285621.1   | GB CN554588.1 CN554588 tae30h02.x1 Hydra EST Darmstadt I Hydra m... | CN554588.1 | 1,00E-124 | 93 |
| CL7CONTIG1   | GB CF653933.1 CF653933 tac78d03.y1 Hydra EST -IV Hydra magnipapi... | CF653933.1 | 1,00E-120 | 94 |
| CL10CONTIG1  | GB BP505283.1 BP505283 BP505283 Hydra magnipapillata cDNA librar... | BP505283.1 | 3,00E-99  | 94 |
| CL41CONTIG1  | GB CB889752.1 CB889752 taa40g10.x3 Hydra EST -III Hydra magnipap... | CB889752.1 | 5,00E-83  | 94 |

Table S3  
KIEL 6 library

|              |                                                                     |            |           |     |
|--------------|---------------------------------------------------------------------|------------|-----------|-----|
| CL50CONTIG1  | GB CV463937.1 CV463937 taj33c02.y1 Hydra EST UCI 5 ALP Hydra mag... | CV463937.1 | 2,00E-45  | 94  |
| CL77CONTIG1  | GB CB073969.1 CB073969 taa22h03.y1 Hydra EST -II Hydra magnipapi... | CB073969.1 | 5,00E-92  | 94  |
| CL79CONTIG1  | GB CD268953.1 CD268953 tab23g03.x1 Hydra EST -III Hydra magnipap... | CD268953.1 | 9,00E-15  | 94  |
| CL80CONTIG1  | GB CA303163.1 CA303163 taa04a06.y1 Hydra cDNA library Hydra magn... | CA303163.1 | 2,00E-75  | 94  |
| CL175CONTIG1 | GB CA302050.1 CA302050 taa09e04.y1 Hydra cDNA library Hydra magn... | CA302050.1 | 1,00E-98  | 94  |
| CL212CONTIG1 | GB CV182623.1 CV182623 tai86b12.y1 Hydra EST UCI 5 ALP Hydra mag... | CV182623.1 | 1,00E-89  | 94  |
| CL221CONTIG1 | GB CD267642.1 CD267642 tab92b05.x1 Hydra EST -III Hydra magnipap... | CD267642.1 | 1,00E-139 | 94  |
| CL228CONTIG1 | GB CA302590.1 CA302590 taa13c10.x1 Hydra cDNA library Hydra magn... | CA302590.1 | 3,00E-90  | 94  |
| CL241CONTIG1 | GB CA303216.1 CA303216 taa04g01.y1 Hydra cDNA library Hydra magn... | CA303216.1 | 4,00E-14  | 94  |
| CV284496.1   | GB CA301765.1 CA301765 taa07g09.y1 Hydra cDNA library Hydra magn... | CA301765.1 | 1,00E-117 | 94  |
| CV285064.1   | GB CB888259.1 CB888259 taa89f11.x1 Hydra EST -III Hydra magnipap... | CB888259.1 | 3,00E-74  | 94  |
| CV285256.1   | GB CD567717.1 CD567717 tab81c08.x1 Hydra EST -III Hydra magnipap... | CD567717.1 | 1,00E-102 | 94  |
| CV285435.1   | GB CV042103.1 CV042103 tai66b12.x1 Hydra EST UCI 5 ALP Hydra mag... | CV042103.1 | 1,00E-109 | 94  |
| CV285464.1   | GB CB888099.1 CB888099 taa87c10.x1 Hydra EST -III Hydra magnipap... | CB888099.1 | 3,00E-27  | 94  |
| CV285597.1   | GB DT605264.1 DT605264 ACAH-aaa06c05.g1 Hydra_EST_UCI-10 Hydra m... | DT605264.1 | 1,00E-151 | 94  |
| CL23CONTIG1  | GB CA301963.1 CA301963 taa11g09.x1 Hydra cDNA library Hydra magn... | CA301963.1 | 2,00E-39  | 95  |
| CL46CONTIG1  | GB CO376856.1 CO376856 tah44a10.x1 Hydra EST -Kiel 5 Hydra magni... | CO376856.1 | 2,00E-65  | 95  |
| CL132CONTIG1 | GB BP504792.1 BP504792 BP504792 Hydra magnipapillata cDNA librar... | BP504792.1 | 5,00E-21  | 95  |
| CL158CONTIG1 | GB BP504674.1 BP504674 BP504674 Hydra magnipapillata cDNA librar... | BP504674.1 | 1,00E-70  | 95  |
| CV284393.1   | GB BP505024.1 BP505024 BP505024 Hydra magnipapillata cDNA librar... | BP505024.1 | 5,00E-71  | 95  |
| CV285157.1   | GB CB072632.1 CB072632 taa25a04.y1 Hydra EST -II Hydra magnipapi... | CB072632.1 | 1,00E-101 | 95  |
| CV285370.1   | GB CB888893.1 CB888893 taa43c04.x3 Hydra EST -III Hydra magnipap... | CB888893.1 | 2,00E-79  | 95  |
| CL14CONTIG1  | GB CB888746.1 CB888746 taa41a05.x3 Hydra EST -III Hydra magnipap... | CB888746.1 | 0         | 96  |
| CL49CONTIG1  | GB CF656403.1 CF656403 tac54a06.y1 Hydra EST -IV Hydra magnipapi... | CF656403.1 | 2,00E-24  | 96  |
| CL87CONTIG1  | GB CN626309.1 CN626309 tae97c03.x1 Hydra EST Darmstadt I Hydra m... | CN626309.1 | 1,00E-175 | 96  |
| CL198CONTIG1 | GB CA301982.1 CA301982 taa12c04.x1 Hydra cDNA library Hydra magn... | CA301982.1 | 1,00E-117 | 96  |
| CL206CONTIG1 | GB CN776141.1 CN776141 tae77h01.y1 Hydra EST Darmstadt I Hydra m... | CN776141.1 | 1,00E-123 | 96  |
| CL222CONTIG1 | GB DT614996.1 DT614996 ACAH-aaa13d05.g1 Hydra_EST_UCI-10 Hydra m... | DT614996.1 | 1,00E-114 | 96  |
| CL227CONTIG1 | GB CF657083.1 CF657083 tac68f10.y1 Hydra EST -IV Hydra magnipapi... | CF657083.1 | 7,00E-91  | 96  |
| CV284352.1   | GB CN553162.1 CN553162 tae25c08.x1 Hydra EST Darmstadt I Hydra m... | CN553162.1 | 1,00E-40  | 96  |
| CV285152.1   | GB CB073174.1 CB073174 taa29d06.y1 Hydra EST -II Hydra magnipapi... | CB073174.1 | 3,00E-71  | 96  |
| CV285420.1   | GB CN775969.1 CN775969 tae79g05.x1 Hydra EST Darmstadt I Hydra m... | CN775969.1 | 3,00E-94  | 96  |
| CV285525.1   | GB CA301771.1 CA301771 taa07h04.y1 Hydra cDNA library Hydra magn... | CA301771.1 | 2,00E-62  | 96  |
| CL94CONTIG1  | GB CA303335.1 CA303335 taa07e07.x1 Hydra cDNA library Hydra magn... | CA303335.1 | 4,00E-60  | 98  |
| CL120CONTIG1 | GB DN248282.2 DN248282 ACAE-aaa25b10.b1 Hydra EST UCI 5 Hydra ma... | DN248282.2 | 3,00E-19  | 98  |
| CV285385.1   | GB CV887927.1 CV887927 tak92c10.y1 Hydra EST UCI 6 Hydra magnipa... | CV887927.1 | 8,00E-93  | 98  |
| CV285492.1   | GB CA303158.1 CA303158 taa03h11.y1 Hydra cDNA library Hydra magn... | CA303158.1 | 3,00E-21  | 98  |
| CV285521.1   | GB CV465102.1 CV465102 taj21g05.x1 Hydra EST UCI 5 ALP Hydra mag... | CV465102.1 | 1,00E-160 | 98  |
| CL3CONTIG2   | GB CB889334.1 CB889334 taa34f06.x3 Hydra EST -III Hydra magnipap... | CB889334.1 | 0         | 99  |
| CL3CONTIG3   | GB CF599902.1 CF599902 tac29f09.x1 Hydra EST -IV Hydra magnipapi... | CF599902.1 | 1,00E-179 | 99  |
| CL11CONTIG1  | GB CD565913.1 CD565913 tab87g12.x1 Hydra EST -III Hydra magnipap... | CD565913.1 | 0         | 99  |
| CV285182.1   | GB CA301678.1 CA301678 taa06e12.y1 Hydra cDNA library Hydra magn... | CA301678.1 | 2,00E-58  | 99  |
| CL3CONTIG1   | GB CF655470.1 CF655470 tac89h03.y1 Hydra EST -IV Hydra magnipapi... | CF655470.1 | 1,00E-125 | 100 |
| CL155CONTIG1 | GB CA301882.1 CA301882 taa09e10.x1 Hydra cDNA library Hydra magn... | CA301882.1 | 5,00E-14  | 100 |
